# Supplementary material for: Analysis of Donor Pancreata Defines the Transcriptomic Signature and Microenvironment of Early Neoplastic Lesions
Source: Oxford University Press journal article supplement (doi:10.1158/2159-8290.cd-23-0013), 2023-04-06
Supplement: cd-23-0013_supplementary_tables_suppst1.xlsx [file cd-23-0013_supplementary_tables_suppst1.xlsx]

## Sheet: Supplemental Table 1
Supplemental Table 1) Demographics and clinical data for donor samples
Donor ID	Sex	Race	Lesions	BMI	Weight (Kg)	DM (Y/N)	EtOH Use	Tobacco Use	Sequencing Run
Donor 1	Female	Black	Yes	43.9	112.5	Y (ID)	Occasional	None	3829-EC
Donor 2	Male	Black	No	29.2	87.3	N	Unrecorded	None	Head 3861-EC; Tail 3862-EC
Donor 3	Male	Black	Yes	21.1	59	N	16 drinks per week	50 pack-year, current use
Donor 4	Male	White	No	28.9	84	N	Occasional	Tobacco x 6yrs, unrecorded amount	Head 4160-EC; Tail 4161-EC
Donor 5	Female	White	Yes	32	77	Y	None	None	Head 4346-EC; Tail 4347-EC
Donor 6	Male	White	No	20.6	61.6	N	Rarely	1-2 cigarettes a month	Head 4450-E; Tail 4451-EC
Donor 7	Female	White	Yes	28.8	81.4	N	6 drinks per day	35 pack-year
Donor 8	Male	White	Yes	32.2	107.9	Y (NID)	4 drinks per day	5 pack-year, quit 1991	Head 4637-EC1; Tail 4637-EC2
Donor 9	Male	Black	Yes	26.1	95.3	N	10 drinks per week	None	Head 4741-EC1; Tail 4741-EC2
Donor 10	Male	White	Yes	22.8	78.2	N	6 drinks per month	29 pack-year, current use
Donor 11	Male	White	Yes	28.6	90.5	N	Daily	Daily
Donor 12	Male	Black	No	20.1	61.6	TBD	1 drink, daily	None
Donor 13	Female	White	No	26.4	83.8	N	Daily	Vape
Donor 14	Male	White	Yes	23.2	71	N	Rarely	1pack a day x 15yrs
Donor 15	Female	Not Specified/Unknown	No	51.2	126.1	N	Occasional	less than a pack a day x 19 yrs
Donor 16	Male	Asian	No	24.2	66	N	Occasional	None
Donor 17	Female	White	Yes	19.2	57.6	N	Daily	Yes-amout not specified
Donor 18	Male	Black	No	34.6	103.5	N	Rarely	1pack a day
Donor 19	Female	White	Yes	30.1	92.8	Y	Occasional	None
Donor 20	Male	White	No	35.1	120	N	Occasional	1-2 sigarettes per day
Donor 21	Male	Black	Yes	22.6	69.2	N	Daily, a pint	2 packs a week
Donor 22	Male	White	No	31.2	95.4	Y (NID)	Occasional	less than a pack a day x 11 yrs
Donor 23	Male	White	Yes	32.8	95.9	Y (NID)	2x a month	5 years
Donor 24	Female	White	No	33.7	93	N	A pint a day	Half pack a day
Donor 25	Female	White	Yes	38.6	105.2	Y	Occasional	1-2 cigarettes a yr
Donor 26	Male	White	Yes	30.9	109	N	1 drink daily x 17yrs	1 pack a day x 17 yrs
Donor 27	Male	White	Yes	26.2	80.28	N	3-4 drinks daily	1 pack a day x 56 yrs
Donor 28	Male	Black	Yes	24.8	82.2	N	Occasional	None
Donor 29	Female	White	No	29.9	69	N	1-2 drinks per week	None
Donor 30	Male	Black	Yes	29.8	91.3	N	Occasional	None

## Sheet: Supplemental Table 2
Supplemental Table 2) Putative Ligand-Receptor pairs comparing all cell types from single cell sequencing of tumor samples compared to healthy samples.
ligands	receptors	source	target	lig_diff_p_adj	rec_diff_p_adj	log2_avg_FC_lig	log2_avg_FC_rec
ADAM9	ITGA6	Epithelial	Epithelial	0	1.81256e-206	1.02542	1.08414
ADAM9	ITGA6	Epithelial	CD8	0	2.95925e-05	1.02542	-0.170167
ADAM9	ITGA6	Epithelial	CD4	0	1.73231e-26	1.02542	-0.37345
ADAM9	ITGA6	Epithelial	Granulocyte	0	5.49129e-19	1.02542	-0.23018
ADAM9	ITGA6	Epithelial	Acinar	0	1.23561e-132	1.02542	-0.20964
ADAM9	ITGA6	Epithelial	Macrophage	0	4.83242e-193	1.02542	-0.266594
ADAM9	ITGA6	Epithelial	Endothelial	0	1.14835e-10	1.02542	0.651675
ADAM9	ITGA6	Epithelial	Pericytes	0	3.37222e-43	1.02542	-0.655421
ADAM9	ITGA6	Epithelial	Mast	0	0.00216001	1.02542	-0.0484321
ADAM9	ITGAV	Epithelial	Epithelial	0	5.12409e-210	1.02542	-0.210961
ADAM9	ITGAV	Epithelial	CD8	0	6.67778e-18	1.02542	-0.122785
ADAM9	ITGAV	Epithelial	Granulocyte	0	2.38354e-30	1.02542	-0.402545
ADAM9	ITGAV	Epithelial	Acinar	0	1.93424e-18	1.02542	0.175201
ADAM9	ITGAV	Epithelial	Macrophage	0	7.78039e-303	1.02542	-0.469458
ADAM9	ITGAV	Epithelial	Fibroblast	0	1.66879e-78	1.02542	0.505525
ADAM9	ITGAV	Epithelial	Endothelial	0	0.000369087	1.02542	0.298994
ADAM9	ITGAV	Epithelial	Pericytes	0	6.6043e-67	1.02542	0.939974
ADAM9	ITGAV	Epithelial	Cycling	0	1.4896e-29	1.02542	-0.321895
ADAM9	ITGB1	Epithelial	Epithelial	0	3.15875e-54	1.02542	0.552297
ADAM9	ITGB1	Epithelial	CD8	0	0.0132055	1.02542	0.541011
ADAM9	ITGB1	Epithelial	CD4	0	7.66525e-49	1.02542	1.08703
ADAM9	ITGB1	Epithelial	Granulocyte	0	5.21787e-89	1.02542	-0.981028
ADAM9	ITGB1	Epithelial	Acinar	0	3.99966e-73	1.02542	0.307803
ADAM9	ITGB1	Epithelial	Macrophage	0	7.4765e-110	1.02542	-0.207552
ADAM9	ITGB1	Epithelial	Fibroblast	0	1.11144e-100	1.02542	0.724058
ADAM9	ITGB1	Epithelial	Endothelial	0	6.8745e-22	1.02542	0.822529
ADAM9	ITGB1	Epithelial	B-Cells	0	9.4663e-17	1.02542	-0.118561
ADAM9	ITGB1	Epithelial	Pericytes	0	3.10722e-21	1.02542	0.360213
ADAM9	ITGB5	Epithelial	Epithelial	0	4.36009e-47	1.02542	0.639393
ADAM9	ITGB5	Epithelial	Macrophage	0	9.80092e-154	1.02542	-0.272626
ADAM9	ITGB5	Epithelial	Fibroblast	0	2.51456e-121	1.02542	0.812175
ADAM9	ITGB5	Epithelial	Endothelial	0	0.000931402	1.02542	-0.388296
ADAM9	ITGB5	Epithelial	Cycling	0	0.00019491	1.02542	0.0653627
ADAM9	ITGB5	Epithelial	NK	0	0.000166277	1.02542	-0.0944836
ADAM9	ITGA3	Epithelial	Epithelial	0	7.99582e-229	1.02542	1.04959
ADAM9	ITGA3	Epithelial	Granulocyte	0	6.44539e-18	1.02542	-0.112182
ADAM9	ITGA3	Epithelial	Acinar	0	4.71169e-05	1.02542	0.349836
ADAM9	ITGA3	Epithelial	Macrophage	0	0.000311281	1.02542	-0.00974927
ADAM9	ITGA3	Epithelial	Endothelial	0	1.50054e-07	1.02542	0.169359
ADAM9	ITGA3	Epithelial	Pericytes	0	0.00167954	1.02542	0.188583
ADAM9	ITGA3	Epithelial	NK	0	0.000166277	1.02542	-0.0673099
ANGPTL1	TEK	Epithelial	Pericytes	0	1.16594e-35	-0.328874	-0.297832
ANXA1	FPR1	Epithelial	Granulocyte	0	1.42339e-33	3.08466	1.2567
ANXA1	FPR1	Epithelial	Acinar	0	2.12109e-175	3.08466	1.58954
ANXA1	FPR1	Epithelial	Macrophage	0	6.10818e-99	3.08466	-0.0889884
ANXA1	FPR1	Epithelial	Cycling	0	1.2531e-15	3.08466	-0.16558
ANXA1	FPR2	Epithelial	Granulocyte	0	8.33166e-09	3.08466	1.18962
ANXA1	FPR2	Epithelial	Acinar	0	1.09155e-76	3.08466	0.592288
ANXA1	FPR3	Epithelial	Macrophage	0	4.2452e-91	3.08466	-0.202433
ANXA1	FPR3	Epithelial	Cycling	0	1.56049e-11	3.08466	-0.25753
ANXA1	DYSF	Epithelial	Epithelial	0	8.49786e-12	3.08466	0.00993366
ANXA1	DYSF	Epithelial	Granulocyte	0	0.00424239	3.08466	0.795201
ANXA1	DYSF	Epithelial	Acinar	0	4.86544e-34	3.08466	0.396242
ANXA1	DYSF	Epithelial	Macrophage	0	1.42446e-15	3.08466	0.0220294
ANXA1	DYSF	Epithelial	Endothelial	0	4.84978e-21	3.08466	0.4928
ANXA1	DYSF	Epithelial	Pericytes	0	3.27857e-11	3.08466	-0.0760182
ANXA1	EGFR	Epithelial	Epithelial	0	3.83547e-75	3.08466	-0.022278
ANXA1	EGFR	Epithelial	Granulocyte	0	7.46215e-15	3.08466	-0.150645
ANXA1	EGFR	Epithelial	Acinar	0	2.41989e-55	3.08466	-0.112528
ANXA1	EGFR	Epithelial	Macrophage	0	1.03082e-16	3.08466	-0.0150589
ANXA1	EGFR	Epithelial	Fibroblast	0	1.29059e-185	3.08466	-1.24907
ANXA1	EGFR	Epithelial	Pericytes	0	1.34765e-05	3.08466	-0.210215
AREG	EGFR	Epithelial	Epithelial	0	3.83547e-75	1.69112	-0.022278
AREG	EGFR	Epithelial	Granulocyte	0	7.46215e-15	1.69112	-0.150645
AREG	EGFR	Epithelial	Acinar	0	2.41989e-55	1.69112	-0.112528
AREG	EGFR	Epithelial	Macrophage	0	1.03082e-16	1.69112	-0.0150589
AREG	EGFR	Epithelial	Fibroblast	0	1.29059e-185	1.69112	-1.24907
AREG	EGFR	Epithelial	Pericytes	0	1.34765e-05	1.69112	-0.210215
AREG	ERBB3	Epithelial	Epithelial	0	1.06765e-77	1.69112	0.702453
AREG	ERBB3	Epithelial	Granulocyte	0	1.42599e-69	1.69112	-0.546832
AREG	ERBB3	Epithelial	Acinar	0	1.24988e-74	1.69112	0.111963
AREG	ERBB3	Epithelial	Macrophage	0	1.0845e-18	1.69112	-0.0118556
ARF1	PLD2	Epithelial	Epithelial	0	1.16725e-34	0.955093	-0.0391712
ARF1	PLD2	Epithelial	Acinar	0	1.38775e-13	0.955093	0.0492544
ARF1	PLD2	Epithelial	Macrophage	0	1.19085e-40	0.955093	-0.0807338
ARF1	PLD2	Epithelial	Cycling	0	2.03501e-08	0.955093	-0.0751382
ARF1	CHRM3	Epithelial	Epithelial	0	2.54126e-81	0.955093	-0.0160533
ARF1	CHRM3	Epithelial	Granulocyte	0	3.35068e-33	0.955093	-0.240384
ARF1	CHRM3	Epithelial	Acinar	0	2.17678e-107	0.955093	-0.452505
ARF1	CHRM3	Epithelial	Macrophage	0	1.75078e-12	0.955093	-0.0114027
ARF1	INSR	Epithelial	CD8	0	6.58315e-17	0.955093	-0.104825
ARF1	INSR	Epithelial	Granulocyte	0	2.04187e-87	0.955093	-0.885724
ARF1	INSR	Epithelial	Acinar	0	5.31197e-230	0.955093	-0.862442
ARF1	INSR	Epithelial	Endothelial	0	1.30169e-53	0.955093	1.99095
ARF1	INSR	Epithelial	Pericytes	0	0.00242262	0.955093	-0.291108
ARF1	INSR	Epithelial	Mast	0	0.00069733	0.955093	-0.304723
ARF1	INSR	Epithelial	Cycling	0	9.64093e-15	0.955093	-0.166513
ARF1	INSR	Epithelial	NK	0	0.000166277	0.955093	-0.123659
BMP4	BMPR1A	Epithelial	Epithelial	0	1.29981e-143	0.733684	-0.160628
BMP4	BMPR1A	Epithelial	Acinar	0	9.91106e-20	0.733684	-0.0283262
BMP4	BMPR1A	Epithelial	Cycling	0	0.0123545	0.733684	-0.0320408
BMP4	BMPR1A	Epithelial	Plasma	0	2.80016e-07	0.733684	-0.0095507
BMP4	BMPR1B	Epithelial	Epithelial	0	0	0.733684	-0.161487
BMP4	BMPR1B	Epithelial	Fibroblast	0	3.91464e-47	0.733684	0.154341
BMP4	BMPR1B	Epithelial	Cycling	0	3.08102e-06	0.733684	-0.0358031
BMP4	BMPR2	Epithelial	Epithelial	0	0.000221682	0.733684	0.270654
BMP4	BMPR2	Epithelial	Granulocyte	0	5.42851e-14	0.733684	-0.347993
BMP4	BMPR2	Epithelial	Acinar	0	3.0953e-37	0.733684	0.0462386
BMP4	BMPR2	Epithelial	Macrophage	0	1.74144e-139	0.733684	-0.221181
BMP4	BMPR2	Epithelial	Fibroblast	0	4.84215e-55	0.733684	0.477772
BMP4	BMPR2	Epithelial	Endothelial	0	1.84512e-06	0.733684	0.50489
BMP4	BMPR2	Epithelial	Cycling	0	0.00167208	0.733684	-0.0635535
C3	C3AR1	Epithelial	Granulocyte	0	4.46647e-50	-1.32876	-1.0614
C3	C3AR1	Epithelial	Macrophage	0	0	-1.32876	-0.640566
C3	C3AR1	Epithelial	Cycling	0	1.10673e-23	-1.32876	-0.384564
C3	C3AR1	Granulocyte	Granulocyte	0	4.46647e-50	-2.19983	-1.0614
C3	C3AR1	Granulocyte	Macrophage	0	0	-2.19983	-0.640566
C3	C3AR1	Granulocyte	Cycling	0	1.10673e-23	-2.19983	-0.384564
C3	ITGAX	Epithelial	Granulocyte	0	2.0318e-17	-1.32876	1.19363
C3	ITGAX	Epithelial	Acinar	0	0	-1.32876	2.32686
C3	ITGAX	Epithelial	Cycling	0	3.67442e-08	-1.32876	-0.0697774
C3	ITGAX	Granulocyte	Granulocyte	0	2.0318e-17	-2.19983	1.19363
C3	ITGAX	Granulocyte	Acinar	0	0	-2.19983	2.32686
C3	ITGAX	Granulocyte	Cycling	0	3.67442e-08	-2.19983	-0.0697774
C3	ITGB2	Epithelial	CD8	0	4.44859e-05	-1.32876	0.545658
C3	ITGB2	Epithelial	Acinar	0	1.45726e-05	-1.32876	0.542202
C3	ITGB2	Epithelial	Macrophage	0	7.63401e-100	-1.32876	-0.233667
C3	ITGB2	Epithelial	Fibroblast	0	1.41187e-07	-1.32876	0.119113
C3	ITGB2	Epithelial	Cycling	0	7.42316e-12	-1.32876	-0.608555
C3	ITGB2	Epithelial	Plasma	0	2.10606e-14	-1.32876	-0.0663268
C3	ITGB2	Granulocyte	CD8	0	4.44859e-05	-2.19983	0.545658
C3	ITGB2	Granulocyte	Acinar	0	1.45726e-05	-2.19983	0.542202
C3	ITGB2	Granulocyte	Macrophage	0	7.63401e-100	-2.19983	-0.233667
C3	ITGB2	Granulocyte	Fibroblast	0	1.41187e-07	-2.19983	0.119113
C3	ITGB2	Granulocyte	Cycling	0	7.42316e-12	-2.19983	-0.608555
C3	ITGB2	Granulocyte	Plasma	0	2.10606e-14	-2.19983	-0.0663268
C3	LRP1	Epithelial	Epithelial	0	1.99124e-148	-1.32876	0.475578
C3	LRP1	Epithelial	CD8	0	4.54939e-09	-1.32876	-0.0610558
C3	LRP1	Epithelial	Granulocyte	0	1.48994e-08	-1.32876	-0.276267
C3	LRP1	Epithelial	Macrophage	0	0	-1.32876	-0.548958
C3	LRP1	Epithelial	Fibroblast	0	7.27225e-24	-1.32876	-0.488639
C3	LRP1	Epithelial	Cycling	0	4.47323e-09	-1.32876	-0.412677
C3	LRP1	Epithelial	NK	0	0.0411012	-1.32876	-0.0933615
C3	LRP1	Granulocyte	Epithelial	0	1.99124e-148	-2.19983	0.475578
C3	LRP1	Granulocyte	CD8	0	4.54939e-09	-2.19983	-0.0610558
C3	LRP1	Granulocyte	Granulocyte	0	1.48994e-08	-2.19983	-0.276267
C3	LRP1	Granulocyte	Macrophage	0	0	-2.19983	-0.548958
C3	LRP1	Granulocyte	Fibroblast	0	7.27225e-24	-2.19983	-0.488639
C3	LRP1	Granulocyte	Cycling	0	4.47323e-09	-2.19983	-0.412677
C3	LRP1	Granulocyte	NK	0	0.0411012	-2.19983	-0.0933615
C3	C5AR2	Epithelial	Acinar	0	5.78171e-150	-1.32876	0.924307
C3	C5AR2	Epithelial	Macrophage	0	9.38062e-33	-1.32876	-0.100159
C3	C5AR2	Granulocyte	Acinar	0	5.78171e-150	-2.19983	0.924307
C3	C5AR2	Granulocyte	Macrophage	0	9.38062e-33	-2.19983	-0.100159
C3	CD19	Epithelial	Macrophage	0	0.000109744	-1.32876	-0.00895565
C3	CD19	Epithelial	B-Cells	0	4.83199e-06	-1.32876	0.425689
C3	CD19	Granulocyte	Macrophage	0	0.000109744	-2.19983	-0.00895565
C3	CD19	Granulocyte	B-Cells	0	4.83199e-06	-2.19983	0.425689
C3	CD46	Epithelial	Epithelial	0	6.47465e-07	-1.32876	0.412758
C3	CD46	Epithelial	CD4	0	9.75507e-06	-1.32876	-0.149818
C3	CD46	Epithelial	Granulocyte	0	8.40501e-05	-1.32876	0.825494
C3	CD46	Epithelial	Acinar	0	3.51722e-45	-1.32876	0.727867
C3	CD46	Epithelial	Macrophage	0	2.94765e-91	-1.32876	-0.0816048
C3	CD46	Epithelial	B-Cells	0	9.62545e-18	-1.32876	-0.325363
C3	CD46	Epithelial	Cycling	0	0.000436759	-1.32876	0.110196
C3	CD46	Epithelial	Plasma	0	1.10994e-10	-1.32876	-0.472687
C3	CD46	Granulocyte	Epithelial	0	6.47465e-07	-2.19983	0.412758
C3	CD46	Granulocyte	CD4	0	9.75507e-06	-2.19983	-0.149818
C3	CD46	Granulocyte	Granulocyte	0	8.40501e-05	-2.19983	0.825494
C3	CD46	Granulocyte	Acinar	0	3.51722e-45	-2.19983	0.727867
C3	CD46	Granulocyte	Macrophage	0	2.94765e-91	-2.19983	-0.0816048
C3	CD46	Granulocyte	B-Cells	0	9.62545e-18	-2.19983	-0.325363
C3	CD46	Granulocyte	Cycling	0	0.000436759	-2.19983	0.110196
C3	CD46	Granulocyte	Plasma	0	1.10994e-10	-2.19983	-0.472687
C3	CR1	Epithelial	CD8	0	3.67988e-07	-1.32876	-0.0442761
C3	CR1	Epithelial	CD4	0	1.07912e-11	-1.32876	-0.0726509
C3	CR1	Epithelial	Acinar	0	1.867e-61	-1.32876	0.653828
C3	CR1	Granulocyte	CD8	0	3.67988e-07	-2.19983	-0.0442761
C3	CR1	Granulocyte	CD4	0	1.07912e-11	-2.19983	-0.0726509
C3	CR1	Granulocyte	Acinar	0	1.867e-61	-2.19983	0.653828
C3	ITGAM	Epithelial	Epithelial	0	3.9642e-25	-1.32876	-0.00829537
C3	ITGAM	Epithelial	Acinar	0	3.86608e-51	-1.32876	0.89095
C3	ITGAM	Epithelial	Macrophage	0	5.86353e-07	-1.32876	0.215435
C3	ITGAM	Epithelial	Cycling	0	1.17388e-21	-1.32876	-0.212935
C3	ITGAM	Granulocyte	Epithelial	0	3.9642e-25	-2.19983	-0.00829537
C3	ITGAM	Granulocyte	Acinar	0	3.86608e-51	-2.19983	0.89095
C3	ITGAM	Granulocyte	Macrophage	0	5.86353e-07	-2.19983	0.215435
C3	ITGAM	Granulocyte	Cycling	0	1.17388e-21	-2.19983	-0.212935
CCK	CCKBR	Epithelial	Acinar	0	4.38431e-07	0.456566	-0.0342363
CCL2	ACKR2	Epithelial	Epithelial	0	0.012877	-2.73992	0.00737904
CCL2	CCR1	Epithelial	Granulocyte	0	0.00134946	-2.73992	0.912562
CCL2	CCR1	Epithelial	Acinar	0	2.5484e-42	-2.73992	0.624598
CCL2	CCR1	Epithelial	Macrophage	0	1.17391e-112	-2.73992	-0.167999
CCL2	CCR1	Epithelial	Fibroblast	0	2.04056e-52	-2.73992	-0.215499
CCL2	CCR1	Epithelial	Cycling	0	1.15735e-10	-2.73992	-0.2239
CCL2	CCR2	Epithelial	Granulocyte	0	7.3136e-15	-2.73992	-0.0655415
CCL2	CCR2	Epithelial	Macrophage	0	4.74146e-116	-2.73992	-0.17759
CCL2	CCR2	Epithelial	Cycling	0	6.62444e-07	-2.73992	-0.114769
CCL2	CCR3	Epithelial	Acinar	0	4.83503e-26	-2.73992	0.15839
CCL2	CCR3	Epithelial	Mast	0	0.000401283	-2.73992	-0.306043
CCL2	CCR4	Epithelial	CD4	0	3.00447e-17	-2.73992	0.33144
CCL2	CCR4	Epithelial	Acinar	0	1.30654e-05	-2.73992	0.0509255
CCL2	CCR5	Epithelial	Macrophage	0	4.57552e-95	-2.73992	-0.143646
CCL2	CCR5	Epithelial	Cycling	0	0.00546272	-2.73992	-0.022634
CCL2	CCR5	Epithelial	Plasma	0	1.78033e-05	-2.73992	-0.00279562
CCL2	ACKR1	Epithelial	Endothelial	0	1.10032e-10	-2.73992	0.600822
CCL2	ACKR1	Epithelial	Pericytes	0	0.00142579	-2.73992	-0.728622
CCL2	ACKR4	Epithelial	Epithelial	0	1.53238e-31	-2.73992	0.0725698
CCL2	ACKR4	Epithelial	Acinar	0	2.24033e-09	-2.73992	-0.00470508
CCL2	CCR10	Epithelial	Epithelial	0	7.36811e-11	-2.73992	-0.00795189
CCL2	CCR10	Epithelial	Macrophage	0	3.64906e-21	-2.73992	-0.0240488
CCL2	CCR10	Epithelial	Fibroblast	0	0.000990659	-2.73992	-0.00179232
CD24	SELP	Epithelial	Endothelial	0	9.67689e-29	-0.428663	1.05612
CD24	SELP	Granulocyte	Endothelial	0	9.67689e-29	-2.49925	1.05612
CD55	ADGRE5	Epithelial	Epithelial	0	4.74128e-70	2.84978	0.293917
CD55	ADGRE5	Epithelial	Granulocyte	0	5.95588e-15	2.84978	1.11739
CD55	ADGRE5	Epithelial	Macrophage	0	0.000131712	2.84978	0.196942
CD55	ADGRE5	Epithelial	Fibroblast	0	1.99574e-34	2.84978	-0.251341
CD55	ADGRE5	Epithelial	B-Cells	0	1.65145e-08	2.84978	-0.166197
CD55	ADGRE5	Epithelial	Plasma	0	5.53228e-77	2.84978	-0.146055
CD55	CR1	Epithelial	CD8	0	3.67988e-07	2.84978	-0.0442761
CD55	CR1	Epithelial	CD4	0	1.07912e-11	2.84978	-0.0726509
CD55	CR1	Epithelial	Acinar	0	1.867e-61	2.84978	0.653828
COL18A1	GPC1	Epithelial	Epithelial	0	0.000432424	-1.97116	0.138874
COL18A1	GPC1	Epithelial	Granulocyte	0	0.011637	-1.97116	-0.0170515
COL18A1	GPC1	Epithelial	Acinar	0	6.36811e-26	-1.97116	0.025549
COL18A1	GPC1	Epithelial	Fibroblast	0	6.51354e-70	-1.97116	0.416915
COL18A1	GPC1	Epithelial	Pericytes	0	4.54408e-18	-1.97116	0.311319
COL18A1	ITGA5	Epithelial	Epithelial	0	0	-1.97116	-0.162179
COL18A1	ITGA5	Epithelial	Acinar	0	6.25867e-13	-1.97116	0.858009
COL18A1	ITGA5	Epithelial	Macrophage	0	6.97981e-79	-1.97116	-0.126124
COL18A1	ITGA5	Epithelial	Endothelial	0	2.3746e-48	-1.97116	1.06539
COL18A1	ITGA5	Epithelial	Cycling	0	1.27181e-24	-1.97116	-0.228415
COL18A1	ITGB1	Epithelial	Epithelial	0	3.15875e-54	-1.97116	0.552297
COL18A1	ITGB1	Epithelial	CD8	0	0.0132055	-1.97116	0.541011
COL18A1	ITGB1	Epithelial	CD4	0	7.66525e-49	-1.97116	1.08703
COL18A1	ITGB1	Epithelial	Granulocyte	0	5.21787e-89	-1.97116	-0.981028
COL18A1	ITGB1	Epithelial	Acinar	0	3.99966e-73	-1.97116	0.307803
COL18A1	ITGB1	Epithelial	Macrophage	0	7.4765e-110	-1.97116	-0.207552
COL18A1	ITGB1	Epithelial	Fibroblast	0	1.11144e-100	-1.97116	0.724058
COL18A1	ITGB1	Epithelial	Endothelial	0	6.8745e-22	-1.97116	0.822529
COL18A1	ITGB1	Epithelial	B-Cells	0	9.4663e-17	-1.97116	-0.118561
COL18A1	ITGB1	Epithelial	Pericytes	0	3.10722e-21	-1.97116	0.360213
COL18A1	GPC4	Epithelial	Epithelial	0	3.88492e-34	-1.97116	-0.00622333
COL18A1	GPC4	Epithelial	Acinar	0	3.9284e-34	-1.97116	-0.0418342
COL18A1	GPC4	Epithelial	Mast	0	0.00216001	-1.97116	-0.0490771
COL18A1	KDR	Epithelial	Granulocyte	0	1.03512e-08	-1.97116	-0.134935
COL18A1	KDR	Epithelial	Pericytes	0	8.22889e-47	-1.97116	-0.973168
COL18A1	KDR	Epithelial	NK	0	0.000166277	-1.97116	-0.270649
COL1A1	DDR1	Fibroblast	Epithelial	0	1.93137e-37	3.40824	0.0944046
COL1A1	DDR1	Fibroblast	Granulocyte	0	4.91559e-24	3.40824	-0.24638
COL1A1	DDR1	Fibroblast	Acinar	0	4.56989e-53	3.40824	-0.0504608
COL1A1	DDR1	Fibroblast	Pericytes	0	0.00484717	3.40824	0.0631909
COL1A1	DDR1	Fibroblast	Cycling	0	0.000284406	3.40824	-0.0746372
COL1A1	DDR2	Fibroblast	Acinar	0	3.64769e-06	3.40824	-0.0825654
COL1A1	DDR2	Fibroblast	Macrophage	0	2.43097e-05	3.40824	-0.0092581
COL1A1	DDR2	Fibroblast	Fibroblast	0	3.11134e-53	3.40824	0.280774
COL1A1	DDR2	Fibroblast	Pericytes	0	1.10569e-14	3.40824	0.33162
COL1A1	ITGA11	Fibroblast	Fibroblast	0	2.29304e-132	3.40824	0.744751
COL1A1	ITGA11	Fibroblast	Pericytes	0	1.70635e-14	3.40824	0.190604
COL1A1	ITGA2	Fibroblast	Epithelial	0	0	3.40824	1.51184
COL1A1	ITGA2	Fibroblast	CD8	0	0.001315	3.40824	-0.0424823
COL1A1	ITGA2	Fibroblast	Granulocyte	0	1.26442e-05	3.40824	-0.105921
COL1A1	ITGA2	Fibroblast	Fibroblast	0	1.09254e-49	3.40824	0.292511
COL1A1	ITGA2	Fibroblast	Endothelial	0	2.74857e-49	3.40824	0.623198
COL1A1	ITGB1	Fibroblast	Epithelial	0	3.15875e-54	3.40824	0.552297
COL1A1	ITGB1	Fibroblast	CD8	0	0.0132055	3.40824	0.541011
COL1A1	ITGB1	Fibroblast	CD4	0	7.66525e-49	3.40824	1.08703
COL1A1	ITGB1	Fibroblast	Granulocyte	0	5.21787e-89	3.40824	-0.981028
COL1A1	ITGB1	Fibroblast	Acinar	0	3.99966e-73	3.40824	0.307803
COL1A1	ITGB1	Fibroblast	Macrophage	0	7.4765e-110	3.40824	-0.207552
COL1A1	ITGB1	Fibroblast	Fibroblast	0	1.11144e-100	3.40824	0.724058
COL1A1	ITGB1	Fibroblast	Endothelial	0	6.8745e-22	3.40824	0.822529
COL1A1	ITGB1	Fibroblast	B-Cells	0	9.4663e-17	3.40824	-0.118561
COL1A1	ITGB1	Fibroblast	Pericytes	0	3.10722e-21	3.40824	0.360213
COL1A1	CD36	Fibroblast	Epithelial	0	0.00280973	3.40824	-0.059447
COL1A1	CD36	Fibroblast	CD4	0	0.0217507	3.40824	-0.118653
COL1A1	CD36	Fibroblast	Granulocyte	0	1.71159e-26	3.40824	-0.326375
COL1A1	CD36	Fibroblast	Macrophage	0	7.77383e-11	3.40824	0.359012
COL1A1	CD36	Fibroblast	Fibroblast	0	1.53056e-10	3.40824	-0.641524
COL1A1	CD36	Fibroblast	Endothelial	0	5.44668e-61	3.40824	-1.57348
COL1A1	CD36	Fibroblast	Pericytes	0	1.63477e-83	3.40824	-3.00413
COL1A1	CD36	Fibroblast	Cycling	0	1.75634e-07	3.40824	-0.229692
COL1A1	CD36	Fibroblast	NK	0	3.092e-07	3.40824	-0.809006
COL1A1	CD44	Fibroblast	Epithelial	0	5.21275e-124	3.40824	-0.169094
COL1A1	CD44	Fibroblast	CD8	0	1.74454e-19	3.40824	0.512652
COL1A1	CD44	Fibroblast	CD4	0	1.30883e-18	3.40824	0.511945
COL1A1	CD44	Fibroblast	Acinar	0	1.6862e-41	3.40824	0.663397
COL1A1	CD44	Fibroblast	Macrophage	0	1.2466e-64	3.40824	0.786408
COL1A1	CD44	Fibroblast	Fibroblast	0	4.87529e-23	3.40824	-0.734852
COL1A1	CD44	Fibroblast	Pericytes	0	3.40416e-13	3.40824	0.406512
COL1A1	CD44	Fibroblast	Mast	0	1.43683e-15	3.40824	0.858086
COL1A1	CD44	Fibroblast	Cycling	0	0.0208429	3.40824	0.0151378
COL1A1	CD93	Fibroblast	CD8	0	6.91724e-06	3.40824	-0.0438169
COL1A1	CD93	Fibroblast	Acinar	0	1.22953e-60	3.40824	1.00255
COL1A1	CD93	Fibroblast	Macrophage	0	3.55082e-135	3.40824	-0.246845
COL1A1	CD93	Fibroblast	Endothelial	0	1.89637e-43	3.40824	1.01974
COL1A1	CD93	Fibroblast	Pericytes	0	6.63421e-47	3.40824	-0.847037
COL1A1	CD93	Fibroblast	Cycling	0	5.09373e-23	3.40824	-0.432069
COL1A1	CD93	Fibroblast	NK	0	1.8931e-05	3.40824	-0.167809
COL1A1	ITGA5	Fibroblast	Epithelial	0	0	3.40824	-0.162179
COL1A1	ITGA5	Fibroblast	Acinar	0	6.25867e-13	3.40824	0.858009
COL1A1	ITGA5	Fibroblast	Macrophage	0	6.97981e-79	3.40824	-0.126124
COL1A1	ITGA5	Fibroblast	Endothelial	0	2.3746e-48	3.40824	1.06539
COL1A1	ITGA5	Fibroblast	Cycling	0	1.27181e-24	3.40824	-0.228415
COL1A1	TMPRSS6	Fibroblast	Epithelial	0	2.2994e-10	3.40824	0.0111924
COL4A1	ITGA1	Epithelial	Epithelial	0	2.92103e-168	-0.280288	0.296371
COL4A1	ITGA1	Epithelial	CD8	0	2.87087e-05	-0.280288	0.411396
COL4A1	ITGA1	Epithelial	Macrophage	0	9.37225e-06	-0.280288	-0.0154248
COL4A1	ITGA1	Epithelial	Fibroblast	0	6.49626e-116	-0.280288	0.898987
COL4A1	ITGA1	Epithelial	Pericytes	0	8.59805e-17	-0.280288	0.450837
COL4A1	ITGA1	Epithelial	Cycling	0	4.83249e-07	-0.280288	0.501826
COL4A1	ITGB1	Epithelial	Epithelial	0	3.15875e-54	-0.280288	0.552297
COL4A1	ITGB1	Epithelial	CD8	0	0.0132055	-0.280288	0.541011
COL4A1	ITGB1	Epithelial	CD4	0	7.66525e-49	-0.280288	1.08703
COL4A1	ITGB1	Epithelial	Granulocyte	0	5.21787e-89	-0.280288	-0.981028
COL4A1	ITGB1	Epithelial	Acinar	0	3.99966e-73	-0.280288	0.307803
COL4A1	ITGB1	Epithelial	Macrophage	0	7.4765e-110	-0.280288	-0.207552
COL4A1	ITGB1	Epithelial	Fibroblast	0	1.11144e-100	-0.280288	0.724058
COL4A1	ITGB1	Epithelial	Endothelial	0	6.8745e-22	-0.280288	0.822529
COL4A1	ITGB1	Epithelial	B-Cells	0	9.4663e-17	-0.280288	-0.118561
COL4A1	ITGB1	Epithelial	Pericytes	0	3.10722e-21	-0.280288	0.360213
COL4A1	CD93	Epithelial	CD8	0	6.91724e-06	-0.280288	-0.0438169
COL4A1	CD93	Epithelial	Acinar	0	1.22953e-60	-0.280288	1.00255
COL4A1	CD93	Epithelial	Macrophage	0	3.55082e-135	-0.280288	-0.246845
COL4A1	CD93	Epithelial	Endothelial	0	1.89637e-43	-0.280288	1.01974
COL4A1	CD93	Epithelial	Pericytes	0	6.63421e-47	-0.280288	-0.847037
COL4A1	CD93	Epithelial	Cycling	0	5.09373e-23	-0.280288	-0.432069
COL4A1	CD93	Epithelial	NK	0	1.8931e-05	-0.280288	-0.167809
COL4A1	ITGAV	Epithelial	Epithelial	0	5.12409e-210	-0.280288	-0.210961
COL4A1	ITGAV	Epithelial	CD8	0	6.67778e-18	-0.280288	-0.122785
COL4A1	ITGAV	Epithelial	Granulocyte	0	2.38354e-30	-0.280288	-0.402545
COL4A1	ITGAV	Epithelial	Acinar	0	1.93424e-18	-0.280288	0.175201
COL4A1	ITGAV	Epithelial	Macrophage	0	7.78039e-303	-0.280288	-0.469458
COL4A1	ITGAV	Epithelial	Fibroblast	0	1.66879e-78	-0.280288	0.505525
COL4A1	ITGAV	Epithelial	Endothelial	0	0.000369087	-0.280288	0.298994
COL4A1	ITGAV	Epithelial	Pericytes	0	6.6043e-67	-0.280288	0.939974
COL4A1	ITGAV	Epithelial	Cycling	0	1.4896e-29	-0.280288	-0.321895
CCN2	ITGAM	Epithelial	Epithelial	0	3.9642e-25	-2.46834	-0.00829537
CCN2	ITGAM	Epithelial	Acinar	0	3.86608e-51	-2.46834	0.89095
CCN2	ITGAM	Epithelial	Macrophage	0	5.86353e-07	-2.46834	0.215435
CCN2	ITGAM	Epithelial	Cycling	0	1.17388e-21	-2.46834	-0.212935
CCN2	ITGB2	Epithelial	CD8	0	4.44859e-05	-2.46834	0.545658
CCN2	ITGB2	Epithelial	Acinar	0	1.45726e-05	-2.46834	0.542202
CCN2	ITGB2	Epithelial	Macrophage	0	7.63401e-100	-2.46834	-0.233667
CCN2	ITGB2	Epithelial	Fibroblast	0	1.41187e-07	-2.46834	0.119113
CCN2	ITGB2	Epithelial	Cycling	0	7.42316e-12	-2.46834	-0.608555
CCN2	ITGB2	Epithelial	Plasma	0	2.10606e-14	-2.46834	-0.0663268
CCN2	LRP6	Epithelial	Epithelial	0	1.68785e-200	-2.46834	-0.150105
CCN2	LRP6	Epithelial	CD4	0	0.000477955	-2.46834	-0.0197302
CCN2	LRP6	Epithelial	Granulocyte	0	2.58065e-18	-2.46834	-0.181177
CCN2	LRP6	Epithelial	Acinar	0	1.94612e-59	-2.46834	-0.15918
CCN2	LRP6	Epithelial	Fibroblast	0	8.03492e-06	-2.46834	0.0779095
CCN2	LRP6	Epithelial	Endothelial	0	1.26092e-31	-2.46834	0.449149
CCN2	ERBB4	Epithelial	Epithelial	0	0	-2.46834	-0.216762
CCN2	ERBB4	Epithelial	Acinar	0	0.00425845	-2.46834	-0.0159809
CCN2	ERBB4	Epithelial	Cycling	0	1.4908e-13	-2.46834	-0.0577671
CCN2	ITGA5	Epithelial	Epithelial	0	0	-2.46834	-0.162179
CCN2	ITGA5	Epithelial	Acinar	0	6.25867e-13	-2.46834	0.858009
CCN2	ITGA5	Epithelial	Macrophage	0	6.97981e-79	-2.46834	-0.126124
CCN2	ITGA5	Epithelial	Endothelial	0	2.3746e-48	-2.46834	1.06539
CCN2	ITGA5	Epithelial	Cycling	0	1.27181e-24	-2.46834	-0.228415
CCN2	LRP1	Epithelial	Epithelial	0	1.99124e-148	-2.46834	0.475578
CCN2	LRP1	Epithelial	CD8	0	4.54939e-09	-2.46834	-0.0610558
CCN2	LRP1	Epithelial	Granulocyte	0	1.48994e-08	-2.46834	-0.276267
CCN2	LRP1	Epithelial	Macrophage	0	0	-2.46834	-0.548958
CCN2	LRP1	Epithelial	Fibroblast	0	7.27225e-24	-2.46834	-0.488639
CCN2	LRP1	Epithelial	Cycling	0	4.47323e-09	-2.46834	-0.412677
CCN2	LRP1	Epithelial	NK	0	0.0411012	-2.46834	-0.0933615
CCN2	NTRK1	Epithelial	Fibroblast	0	4.71872e-25	-2.46834	-0.104366
CCN2	NTRK1	Epithelial	Mast	0	9.96305e-10	-2.46834	0.644834
CXCL12	ACKR3	Epithelial	Acinar	0	2.8107e-43	-0.158334	-0.0458291
CXCL12	ACKR3	Epithelial	Macrophage	0	1.10444e-23	-0.158334	0.151259
CXCL12	ACKR3	Epithelial	Fibroblast	0	2.78269e-20	-0.158334	-0.399387
CXCL12	ACKR3	Epithelial	Endothelial	0	1.41885e-41	-0.158334	0.321789
CXCL12	CXCR3	Epithelial	Epithelial	0	3.53821e-31	-0.158334	0.032591
CXCL12	CXCR3	Epithelial	CD4	0	1.29021e-05	-0.158334	0.256938
CXCL12	CXCR3	Epithelial	Plasma	0	0.0125753	-0.158334	-0.00568041
CXCL12	CXCR4	Epithelial	Epithelial	0	0.000121241	-0.158334	0.202302
CXCL12	CXCR4	Epithelial	CD8	0	2.90307e-57	-0.158334	0.825534
CXCL12	CXCR4	Epithelial	CD4	0	2.08823e-55	-0.158334	0.980764
CXCL12	CXCR4	Epithelial	Acinar	0	0	-0.158334	2.86465
CXCL12	CXCR4	Epithelial	Macrophage	0	2.57198e-12	-0.158334	0.624931
CXCL12	CXCR4	Epithelial	Fibroblast	0	0.0147191	-0.158334	-0.160083
CXCL12	CXCR4	Epithelial	B-Cells	0	3.36631e-67	-0.158334	0.938636
CXCL12	CXCR4	Epithelial	Mast	0	5.72597e-27	-0.158334	-2.12022
CXCL12	CXCR4	Epithelial	Plasma	0	4.77979e-88	-0.158334	-0.755055
CXCL12	CD4	Epithelial	CD4	0	4.75056e-22	-0.158334	0.521973
CXCL12	CD4	Epithelial	Granulocyte	0	5.45433e-09	-0.158334	-0.0884505
CXCL12	CD4	Epithelial	Macrophage	0	1.27588e-07	-0.158334	0.17311
CXCL12	CD4	Epithelial	Cycling	0	1.85086e-07	-0.158334	-0.0809527
CXCL12	ITGB1	Epithelial	Epithelial	0	3.15875e-54	-0.158334	0.552297
CXCL12	ITGB1	Epithelial	CD8	0	0.0132055	-0.158334	0.541011
CXCL12	ITGB1	Epithelial	CD4	0	7.66525e-49	-0.158334	1.08703
CXCL12	ITGB1	Epithelial	Granulocyte	0	5.21787e-89	-0.158334	-0.981028
CXCL12	ITGB1	Epithelial	Acinar	0	3.99966e-73	-0.158334	0.307803
CXCL12	ITGB1	Epithelial	Macrophage	0	7.4765e-110	-0.158334	-0.207552
CXCL12	ITGB1	Epithelial	Fibroblast	0	1.11144e-100	-0.158334	0.724058
CXCL12	ITGB1	Epithelial	Endothelial	0	6.8745e-22	-0.158334	0.822529
CXCL12	ITGB1	Epithelial	B-Cells	0	9.4663e-17	-0.158334	-0.118561
CXCL12	ITGB1	Epithelial	Pericytes	0	3.10722e-21	-0.158334	0.360213
CXCL2	CXCR1	Epithelial	Granulocyte	0	9.29864e-26	-1.03197	1.63613
CXCL2	CXCR1	Epithelial	Acinar	0	1.48924e-89	-1.03197	0.608633
CXCL2	CXCR2	Epithelial	Granulocyte	0	2.84451e-59	-1.03197	2.64226
CXCL2	CXCR2	Epithelial	Acinar	0	8.67029e-206	-1.03197	1.30837
CXCL2	CXCR2	Epithelial	Macrophage	0	9.48033e-23	-1.03197	0.0249365
CCN1	ITGA5	Epithelial	Epithelial	0	0	-1.49499	-0.162179
CCN1	ITGA5	Epithelial	Acinar	0	6.25867e-13	-1.49499	0.858009
CCN1	ITGA5	Epithelial	Macrophage	0	6.97981e-79	-1.49499	-0.126124
CCN1	ITGA5	Epithelial	Endothelial	0	2.3746e-48	-1.49499	1.06539
CCN1	ITGA5	Epithelial	Cycling	0	1.27181e-24	-1.49499	-0.228415
CCN1	ITGAM	Epithelial	Epithelial	0	3.9642e-25	-1.49499	-0.00829537
CCN1	ITGAM	Epithelial	Acinar	0	3.86608e-51	-1.49499	0.89095
CCN1	ITGAM	Epithelial	Macrophage	0	5.86353e-07	-1.49499	0.215435
CCN1	ITGAM	Epithelial	Cycling	0	1.17388e-21	-1.49499	-0.212935
CCN1	ITGB2	Epithelial	CD8	0	4.44859e-05	-1.49499	0.545658
CCN1	ITGB2	Epithelial	Acinar	0	1.45726e-05	-1.49499	0.542202
CCN1	ITGB2	Epithelial	Macrophage	0	7.63401e-100	-1.49499	-0.233667
CCN1	ITGB2	Epithelial	Fibroblast	0	1.41187e-07	-1.49499	0.119113
CCN1	ITGB2	Epithelial	Cycling	0	7.42316e-12	-1.49499	-0.608555
CCN1	ITGB2	Epithelial	Plasma	0	2.10606e-14	-1.49499	-0.0663268
CCN1	ITGB3	Epithelial	Epithelial	0	2.0559e-09	-1.49499	0.00834496
CCN1	ITGB3	Epithelial	Fibroblast	0	1.77126e-17	-1.49499	-0.198842
CCN1	ITGB3	Epithelial	Endothelial	0	0.00462729	-1.49499	0.0993298
CCN1	ITGB3	Epithelial	Pericytes	0	2.02529e-07	-1.49499	0.136001
CCN1	ITGAV	Epithelial	Epithelial	0	5.12409e-210	-1.49499	-0.210961
CCN1	ITGAV	Epithelial	CD8	0	6.67778e-18	-1.49499	-0.122785
CCN1	ITGAV	Epithelial	Granulocyte	0	2.38354e-30	-1.49499	-0.402545
CCN1	ITGAV	Epithelial	Acinar	0	1.93424e-18	-1.49499	0.175201
CCN1	ITGAV	Epithelial	Macrophage	0	7.78039e-303	-1.49499	-0.469458
CCN1	ITGAV	Epithelial	Fibroblast	0	1.66879e-78	-1.49499	0.505525
CCN1	ITGAV	Epithelial	Endothelial	0	0.000369087	-1.49499	0.298994
CCN1	ITGAV	Epithelial	Pericytes	0	6.6043e-67	-1.49499	0.939974
CCN1	ITGAV	Epithelial	Cycling	0	1.4896e-29	-1.49499	-0.321895
CCN1	ITGB5	Epithelial	Epithelial	0	4.36009e-47	-1.49499	0.639393
CCN1	ITGB5	Epithelial	Macrophage	0	9.80092e-154	-1.49499	-0.272626
CCN1	ITGB5	Epithelial	Fibroblast	0	2.51456e-121	-1.49499	0.812175
CCN1	ITGB5	Epithelial	Endothelial	0	0.000931402	-1.49499	-0.388296
CCN1	ITGB5	Epithelial	Cycling	0	0.00019491	-1.49499	0.0653627
CCN1	ITGB5	Epithelial	NK	0	0.000166277	-1.49499	-0.0944836
DKK1	KREMEN1	Epithelial	Epithelial	0	1.29188e-90	1.50855	-0.0652069
DKK1	KREMEN1	Epithelial	Acinar	0	0.00162301	1.50855	0.28057
DKK1	KREMEN1	Epithelial	Macrophage	0	6.80613e-05	1.50855	0.046879
DKK1	KREMEN1	Epithelial	Mast	0	0.0309538	1.50855	0.306262
DKK1	KREMEN2	Epithelial	Epithelial	0	4.02157e-134	1.50855	0.134129
DKK1	KREMEN2	Epithelial	B-Cells	0	0.00011518	1.50855	-0.10346
DKK1	LRP6	Epithelial	Epithelial	0	1.68785e-200	1.50855	-0.150105
DKK1	LRP6	Epithelial	Granulocyte	0	2.58065e-18	1.50855	-0.181177
DKK1	LRP6	Epithelial	Acinar	0	1.94612e-59	1.50855	-0.15918
DKK1	LRP6	Epithelial	Fibroblast	0	8.03492e-06	1.50855	0.0779095
DKK1	LRP6	Epithelial	Endothelial	0	1.26092e-31	1.50855	0.449149
DKK1	LRP5	Epithelial	Acinar	0	2.46375e-30	1.50855	0.102283
DKK1	LRP5	Epithelial	Fibroblast	0	2.0063e-13	1.50855	0.0188952
DKK1	LRP5	Epithelial	Pericytes	0	0.000185426	1.50855	-0.0446293
DKK1	LRP5	Epithelial	Plasma	0	5.9729e-07	1.50855	-0.0109131
EDN3	EDNRB	Epithelial	Granulocyte	0	0.0162562	-0.243918	-0.0105498
EDN3	EDNRB	Epithelial	Macrophage	0	3.39906e-155	-0.243918	-0.189065
EDN3	EDNRB	Epithelial	Fibroblast	0	0	-0.243918	-2.61572
EDN3	EDNRB	Epithelial	Pericytes	0	1.59256e-36	-0.243918	-1.07797
EDN3	EDNRA	Epithelial	Epithelial	0	0.000377282	-0.243918	0.0147765
EDN3	EDNRA	Epithelial	Fibroblast	0	9.91277e-184	-0.243918	0.75359
EFNA5	EPHA2	Epithelial	Epithelial	0	8.21587e-11	0.626588	0.359746
EFNA5	EPHA2	Epithelial	Pericytes	0	4.48694e-17	0.626588	-0.270829
EFNA5	EPHA3	Epithelial	Fibroblast	0	1.17421e-38	0.626588	0.490664
EFNA5	EPHA3	Epithelial	Pericytes	0	0.00116764	0.626588	-0.128546
EFNA5	EPHA4	Epithelial	Epithelial	0	0	0.626588	0.283743
EFNA5	EPHA4	Epithelial	Granulocyte	0	0.0162562	0.626588	-0.032181
EFNA5	EPHA4	Epithelial	Acinar	0	4.38269e-40	0.626588	0.113943
EFNA5	EPHA4	Epithelial	Fibroblast	0	0.000644362	0.626588	-0.0327982
EFNA5	EPHA4	Epithelial	Pericytes	0	2.48768e-16	0.626588	-0.167133
EFNA5	EPHA4	Epithelial	Cycling	0	0.00235353	0.626588	0.0623996
EFNA5	EPHA8	Epithelial	Acinar	0	2.00914e-05	0.626588	-0.0143797
EFNA5	EPHB2	Epithelial	Epithelial	0	3.83302e-65	0.626588	-0.0743228
EFNA5	EPHB2	Epithelial	Granulocyte	0	1.03512e-08	0.626588	-0.177298
EFNA5	EPHB2	Epithelial	Acinar	0	0.00278655	0.626588	-0.019966
EFNA5	EPHB2	Epithelial	Macrophage	0	5.58246e-66	0.626588	-0.122817
EFNA5	EPHB2	Epithelial	Fibroblast	0	2.64753e-15	0.626588	0.04912
EFNA5	EPHB2	Epithelial	Cycling	0	3.11038e-05	0.626588	-0.0789522
EFNA5	EPHB1	Epithelial	Acinar	0	3.4389e-74	0.626588	0.454492
EFNA5	EPHB1	Epithelial	Fibroblast	0	1.62303e-21	0.626588	-0.0762808
EFNA5	EPHB1	Epithelial	Endothelial	0	3.43456e-49	0.626588	0.128143
EFNA5	EPHB6	Epithelial	Epithelial	0	0	0.626588	-0.953099
EFNA5	EPHB6	Epithelial	Acinar	0	5.65861e-12	0.626588	0.198451
EFNA5	EPHB6	Epithelial	Macrophage	0	1.80225e-32	0.626588	-0.0673491
EFNA5	EPHB6	Epithelial	Pericytes	0	2.87322e-20	0.626588	-0.729452
EFNA5	EPHB6	Epithelial	Cycling	0	6.422e-30	0.626588	-0.351755
EFNB1	EPHB1	Epithelial	Acinar	0	3.4389e-74	0.579657	0.454492
EFNB1	EPHB1	Epithelial	Fibroblast	0	1.62303e-21	0.579657	-0.0762808
EFNB1	EPHB1	Epithelial	Endothelial	0	3.43456e-49	0.579657	0.128143
EFNB1	EPHB2	Epithelial	Epithelial	0	3.83302e-65	0.579657	-0.0743228
EFNB1	EPHB2	Epithelial	Granulocyte	0	1.03512e-08	0.579657	-0.177298
EFNB1	EPHB2	Epithelial	Acinar	0	0.00278655	0.579657	-0.019966
EFNB1	EPHB2	Epithelial	Macrophage	0	5.58246e-66	0.579657	-0.122817
EFNB1	EPHB2	Epithelial	Fibroblast	0	2.64753e-15	0.579657	0.04912
EFNB1	EPHB2	Epithelial	Cycling	0	3.11038e-05	0.579657	-0.0789522
EFNB1	EPHB3	Epithelial	Epithelial	0	0.000561038	0.579657	0.0904461
EFNB1	EPHB3	Epithelial	Granulocyte	0	0.0162562	0.579657	-0.0691708
EFNB1	EPHB3	Epithelial	Acinar	0	2.64466e-27	0.579657	-0.057925
EFNB1	EPHB4	Epithelial	Epithelial	0	0.000788958	0.579657	0.209898
EFNB1	EPHB4	Epithelial	Acinar	0	2.82674e-18	0.579657	0.005784
EFNB1	EPHB4	Epithelial	Fibroblast	0	9.97775e-16	0.579657	0.0294783
EFNB1	EPHB4	Epithelial	Pericytes	0	6.78274e-17	0.579657	-0.194703
EFNB1	EPHB4	Epithelial	Plasma	0	0.00126413	0.579657	-0.00897467
EFNB1	EPHB6	Epithelial	Epithelial	0	0	0.579657	-0.953099
EFNB1	EPHB6	Epithelial	Acinar	0	5.65861e-12	0.579657	0.198451
EFNB1	EPHB6	Epithelial	Macrophage	0	1.80225e-32	0.579657	-0.0673491
EFNB1	EPHB6	Epithelial	Pericytes	0	2.87322e-20	0.579657	-0.729452
EFNB1	EPHB6	Epithelial	Cycling	0	6.422e-30	0.579657	-0.351755
EFNB1	ERBB2	Epithelial	Epithelial	0	0.000690817	0.579657	0.218227
EFNB1	ERBB2	Epithelial	Granulocyte	0	7.3797e-09	0.579657	-0.106978
EFNB1	ERBB2	Epithelial	Acinar	0	3.17071e-29	0.579657	0.0451639
EFNB1	ERBB2	Epithelial	Fibroblast	0	5.16074e-24	0.579657	0.101741
EFNB2	EPHA4	Epithelial	Epithelial	0	0	0.806508	0.283743
EFNB2	EPHA4	Epithelial	Granulocyte	0	0.0162562	0.806508	-0.032181
EFNB2	EPHA4	Epithelial	Acinar	0	4.38269e-40	0.806508	0.113943
EFNB2	EPHA4	Epithelial	Fibroblast	0	0.000644362	0.806508	-0.0327982
EFNB2	EPHA4	Epithelial	Pericytes	0	2.48768e-16	0.806508	-0.167133
EFNB2	EPHA4	Epithelial	Cycling	0	0.00235353	0.806508	0.0623996
EFNB2	EPHB1	Epithelial	Acinar	0	3.4389e-74	0.806508	0.454492
EFNB2	EPHB1	Epithelial	Fibroblast	0	1.62303e-21	0.806508	-0.0762808
EFNB2	EPHB1	Epithelial	Endothelial	0	3.43456e-49	0.806508	0.128143
EFNB2	EPHB2	Epithelial	Epithelial	0	3.83302e-65	0.806508	-0.0743228
EFNB2	EPHB2	Epithelial	Granulocyte	0	1.03512e-08	0.806508	-0.177298
EFNB2	EPHB2	Epithelial	Acinar	0	0.00278655	0.806508	-0.019966
EFNB2	EPHB2	Epithelial	Macrophage	0	5.58246e-66	0.806508	-0.122817
EFNB2	EPHB2	Epithelial	Fibroblast	0	2.64753e-15	0.806508	0.04912
EFNB2	EPHB2	Epithelial	Cycling	0	3.11038e-05	0.806508	-0.0789522
EFNB2	EPHB3	Epithelial	Epithelial	0	0.000561038	0.806508	0.0904461
EFNB2	EPHB3	Epithelial	Granulocyte	0	0.0162562	0.806508	-0.0691708
EFNB2	EPHB3	Epithelial	Acinar	0	2.64466e-27	0.806508	-0.057925
EFNB2	EPHB4	Epithelial	Epithelial	0	0.000788958	0.806508	0.209898
EFNB2	EPHB4	Epithelial	Acinar	0	2.82674e-18	0.806508	0.005784
EFNB2	EPHB4	Epithelial	Fibroblast	0	9.97775e-16	0.806508	0.0294783
EFNB2	EPHB4	Epithelial	Pericytes	0	6.78274e-17	0.806508	-0.194703
EFNB2	EPHB4	Epithelial	Plasma	0	0.00126413	0.806508	-0.00897467
EFNB2	EPHB6	Epithelial	Epithelial	0	0	0.806508	-0.953099
EFNB2	EPHB6	Epithelial	Acinar	0	5.65861e-12	0.806508	0.198451
EFNB2	EPHB6	Epithelial	Macrophage	0	1.80225e-32	0.806508	-0.0673491
EFNB2	EPHB6	Epithelial	Pericytes	0	2.87322e-20	0.806508	-0.729452
EFNB2	EPHB6	Epithelial	Cycling	0	6.422e-30	0.806508	-0.351755
EFNB2	EPHA3	Epithelial	Fibroblast	0	1.17421e-38	0.806508	0.490664
EFNB2	EPHA3	Epithelial	Pericytes	0	0.00116764	0.806508	-0.128546
EFNB2	PECAM1	Epithelial	CD8	0	0.000115362	0.806508	-0.105438
EFNB2	PECAM1	Epithelial	Granulocyte	0	0.00137914	0.806508	0.738495
EFNB2	PECAM1	Epithelial	Acinar	0	4.06758e-36	0.806508	0.685653
EFNB2	PECAM1	Epithelial	Macrophage	0	5.01288e-31	0.806508	0.201686
EFNB2	PECAM1	Epithelial	Endothelial	0	6.1931e-16	0.806508	0.489623
EFNB2	PECAM1	Epithelial	Pericytes	0	1.12634e-49	0.806508	-1.28906
EFNB2	PECAM1	Epithelial	Cycling	0	0.0019646	0.806508	-0.10543
EFNB2	RHBDL2	Epithelial	Epithelial	0	4.59511e-253	0.806508	0.249056
EFNB2	RHBDL2	Epithelial	Pericytes	0	0.00504109	0.806508	0.0446818
EFNB2	RHBDL2	Epithelial	Cycling	0	4.38123e-06	0.806508	0.124754
GAS6	AXL	Epithelial	Epithelial	0	1.27973e-185	-0.846896	0.248055
GAS6	AXL	Epithelial	Fibroblast	0	1.85353e-17	-0.846896	0.0975682
GAS6	MERTK	Epithelial	Epithelial	0	4.9439e-32	-0.846896	-0.00477897
GAS6	MERTK	Epithelial	Granulocyte	0	3.92205e-17	-0.846896	-0.273484
GAS6	MERTK	Epithelial	Acinar	0	0.000978376	-0.846896	-0.0918391
GAS6	MERTK	Epithelial	Macrophage	0	0	-0.846896	-0.595212
GAS6	MERTK	Epithelial	Cycling	0	5.18278e-21	-0.846896	-0.216639
GAS6	TYRO3	Epithelial	Epithelial	0	2.36205e-89	-0.846896	-0.0653239
GAS6	TYRO3	Epithelial	Acinar	0	1.27248e-12	-0.846896	0.0124327
HEBP1	FPR3	Epithelial	Macrophage	0	4.2452e-91	-1.00525	-0.202433
HEBP1	FPR3	Epithelial	Cycling	0	1.56049e-11	-1.00525	-0.25753
IL18	IL18R1	Epithelial	Granulocyte	0	8.75417e-112	1.51024	-1.84674
IL18	IL18R1	Epithelial	Acinar	0	0.00210092	1.51024	0.189586
IL18	IL18R1	Epithelial	Macrophage	0	3.27203e-17	1.51024	-0.037316
IL18	IL18R1	Epithelial	Pericytes	0	2.08729e-15	1.51024	-0.086533
IL18	IL18R1	Macrophage	Granulocyte	0	8.75417e-112	-1.09352	-1.84674
IL18	IL18R1	Macrophage	Acinar	0	0.00210092	-1.09352	0.189586
IL18	IL18R1	Macrophage	Macrophage	0	3.27203e-17	-1.09352	-0.037316
IL18	IL18R1	Macrophage	Pericytes	0	2.08729e-15	-1.09352	-0.086533
IL18	IL18RAP	Epithelial	Acinar	0	1.81845e-13	1.51024	0.186511
IL18	IL18RAP	Macrophage	Acinar	0	1.81845e-13	-1.09352	0.186511
CXCL8	CXCR1	Acinar	Granulocyte	0	9.29864e-26	5.0328	1.63613
CXCL8	CXCR1	Acinar	Acinar	0	1.48924e-89	5.0328	0.608633
CXCL8	CXCR2	Acinar	Granulocyte	0	2.84451e-59	5.0328	2.64226
CXCL8	CXCR2	Acinar	Acinar	0	8.67029e-206	5.0328	1.30837
CXCL8	CXCR2	Acinar	Macrophage	0	9.48033e-23	5.0328	0.0249365
CXCL8	ACKR1	Acinar	Endothelial	0	1.10032e-10	5.0328	0.600822
CXCL8	ACKR1	Acinar	Pericytes	0	0.00142579	5.0328	-0.728622
CXCL8	SDC1	Acinar	Epithelial	0	4.00362e-154	5.0328	0.949572
CXCL8	SDC1	Acinar	Fibroblast	0	3.03355e-141	5.0328	0.936202
CXCL8	SDC2	Acinar	Epithelial	0	0	5.0328	-0.579712
CXCL8	SDC2	Acinar	Granulocyte	0	1.267e-21	5.0328	-0.348546
CXCL8	SDC2	Acinar	Acinar	0	2.15164e-127	5.0328	-0.204166
CXCL8	SDC2	Acinar	Pericytes	0	1.11445e-86	5.0328	1.10568
CXCL8	SDC2	Acinar	Cycling	0	1.71993e-53	5.0328	-0.281254
INHBA	ACVR1	Fibroblast	Epithelial	0	3.64027e-41	2.87554	0.15964
INHBA	ACVR1	Fibroblast	Acinar	0	7.29807e-06	2.87554	0.10262
INHBA	ACVR1	Fibroblast	Macrophage	0	3.02271e-07	2.87554	-0.000540812
INHBA	ACVR1	Fibroblast	Fibroblast	0	2.05428e-20	2.87554	0.150789
INHBA	ACVR1	Fibroblast	Endothelial	0	9.76127e-05	2.87554	0.0937761
INHBA	ACVR1	Fibroblast	Plasma	0	1.75431e-05	2.87554	-0.0223901
INHBA	ACVR1B	Fibroblast	Epithelial	0	0	2.87554	-0.313607
INHBA	ACVR1B	Fibroblast	Acinar	0	5.27709e-41	2.87554	0.0285241
INHBA	ACVR1B	Fibroblast	Macrophage	0	0.000805071	2.87554	-0.0117377
INHBA	ACVR1B	Fibroblast	Fibroblast	0	5.52061e-13	2.87554	-0.24215
INHBA	ACVR1B	Fibroblast	Pericytes	0	0.0291925	2.87554	-0.109205
INHBA	ACVR1B	Fibroblast	Cycling	0	1.9868e-05	2.87554	-0.0763245
INHBA	ACVR1B	Fibroblast	Plasma	0	0.00126413	2.87554	-0.00854679
INHBA	ACVR2A	Fibroblast	Epithelial	0	3.17576e-12	2.87554	-0.0136645
INHBA	ACVR2A	Fibroblast	Acinar	0	3.14402e-06	2.87554	0.0173462
INHBA	ACVR2A	Fibroblast	Macrophage	0	1.54976e-10	2.87554	-0.0168772
INHBA	ACVR2A	Fibroblast	Fibroblast	0	0.0433681	2.87554	0.0769823
INHBA	ACVR2A	Fibroblast	Plasma	0	3.64722e-18	2.87554	-0.0411787
INHBA	ACVR2B	Fibroblast	Acinar	0	8.25534e-15	2.87554	-0.0454304
INHBA	ACVR2B	Fibroblast	Fibroblast	0	5.55467e-12	2.87554	0.0718228
INHBA	ACVR2B	Fibroblast	Endothelial	0	1.98708e-12	2.87554	0.189813
INHBA	BAMBI	Fibroblast	Epithelial	0	1.01973e-172	2.87554	-0.183454
INHBA	BAMBI	Fibroblast	Granulocyte	0	0.0162562	2.87554	-0.0578852
INHBA	BAMBI	Fibroblast	Fibroblast	0	2.62308e-19	2.87554	0.0714866
INHBA	BAMBI	Fibroblast	Cycling	0	8.24438e-07	2.87554	-0.106744
INHBA	ENG	Fibroblast	Granulocyte	0	1.31579e-16	2.87554	-0.372953
INHBA	ENG	Fibroblast	Macrophage	0	5.83827e-50	2.87554	-0.103194
INHBA	ENG	Fibroblast	Fibroblast	0	1.08662e-18	2.87554	0.54419
INHBA	ENG	Fibroblast	Endothelial	0	1.00876e-06	2.87554	0.469118
INHBA	ENG	Fibroblast	Cycling	0	7.40766e-14	2.87554	-0.224249
INHBA	TGFBR3	Fibroblast	Epithelial	0	1.50215e-05	2.87554	0.0134957
INHBA	TGFBR3	Fibroblast	CD8	0	2.33439e-11	2.87554	0.330857
INHBA	TGFBR3	Fibroblast	CD4	0	0.00246584	2.87554	0.1052
INHBA	TGFBR3	Fibroblast	Granulocyte	0	7.34442e-09	2.87554	-0.0958395
INHBA	TGFBR3	Fibroblast	Acinar	0	9.54971e-37	2.87554	-0.0673496
INHBA	TGFBR3	Fibroblast	Macrophage	0	8.87103e-11	2.87554	-0.000233262
INHBA	TGFBR3	Fibroblast	Fibroblast	0	6.41895e-228	2.87554	-1.52454
INHBA	TGFBR3	Fibroblast	Pericytes	0	1.36685e-08	2.87554	-0.242203
INS	INSR	Granulocyte	CD8	0	6.58315e-17	-4.72465	-0.104825
INS	INSR	Granulocyte	Granulocyte	0	2.04187e-87	-4.72465	-0.885724
INS	INSR	Granulocyte	Acinar	0	5.31197e-230	-4.72465	-0.862442
INS	INSR	Granulocyte	Endothelial	0	1.30169e-53	-4.72465	1.99095
INS	INSR	Granulocyte	Pericytes	0	0.00242262	-4.72465	-0.291108
INS	INSR	Granulocyte	Mast	0	0.00069733	-4.72465	-0.304723
INS	INSR	Granulocyte	Cycling	0	9.64093e-15	-4.72465	-0.166513
INS	INSR	Granulocyte	NK	0	0.000166277	-4.72465	-0.123659
INS	IGF1R	Granulocyte	Epithelial	0	6.19456e-192	-4.72465	-0.213684
INS	IGF1R	Granulocyte	CD4	0	3.07899e-13	-4.72465	-0.0989912
INS	IGF1R	Granulocyte	Acinar	0	1.70053e-75	-4.72465	0.351443
INS	IGF1R	Granulocyte	Macrophage	0	5.56639e-13	-4.72465	-0.0096433
INS	IGF1R	Granulocyte	Fibroblast	0	3.86389e-46	-4.72465	0.242349
INS	IGF1R	Granulocyte	Cycling	0	1.23002e-08	-4.72465	-0.0963717
LAMB1	ITGA6	Epithelial	Epithelial	0	1.81256e-206	-0.371364	1.08414
LAMB1	ITGA6	Epithelial	CD8	0	2.95925e-05	-0.371364	-0.170167
LAMB1	ITGA6	Epithelial	CD4	0	1.73231e-26	-0.371364	-0.37345
LAMB1	ITGA6	Epithelial	Granulocyte	0	5.49129e-19	-0.371364	-0.23018
LAMB1	ITGA6	Epithelial	Acinar	0	1.23561e-132	-0.371364	-0.20964
LAMB1	ITGA6	Epithelial	Macrophage	0	4.83242e-193	-0.371364	-0.266594
LAMB1	ITGA6	Epithelial	Endothelial	0	1.14835e-10	-0.371364	0.651675
LAMB1	ITGA6	Epithelial	Pericytes	0	3.37222e-43	-0.371364	-0.655421
LAMB1	ITGA6	Epithelial	Mast	0	0.00216001	-0.371364	-0.0484321
LAMB1	ITGB1	Epithelial	Epithelial	0	3.15875e-54	-0.371364	0.552297
LAMB1	ITGB1	Epithelial	CD8	0	0.0132055	-0.371364	0.541011
LAMB1	ITGB1	Epithelial	CD4	0	7.66525e-49	-0.371364	1.08703
LAMB1	ITGB1	Epithelial	Granulocyte	0	5.21787e-89	-0.371364	-0.981028
LAMB1	ITGB1	Epithelial	Acinar	0	3.99966e-73	-0.371364	0.307803
LAMB1	ITGB1	Epithelial	Macrophage	0	7.4765e-110	-0.371364	-0.207552
LAMB1	ITGB1	Epithelial	Fibroblast	0	1.11144e-100	-0.371364	0.724058
LAMB1	ITGB1	Epithelial	Endothelial	0	6.8745e-22	-0.371364	0.822529
LAMB1	ITGB1	Epithelial	B-Cells	0	9.4663e-17	-0.371364	-0.118561
LAMB1	ITGB1	Epithelial	Pericytes	0	3.10722e-21	-0.371364	0.360213
LAMC2	ITGA3	Epithelial	Epithelial	0	7.99582e-229	1.72643	1.04959
LAMC2	ITGA3	Epithelial	Granulocyte	0	6.44539e-18	1.72643	-0.112182
LAMC2	ITGA3	Epithelial	Acinar	0	4.71169e-05	1.72643	0.349836
LAMC2	ITGA3	Epithelial	Macrophage	0	0.000311281	1.72643	-0.00974927
LAMC2	ITGA3	Epithelial	Endothelial	0	1.50054e-07	1.72643	0.169359
LAMC2	ITGA3	Epithelial	Pericytes	0	0.00167954	1.72643	0.188583
LAMC2	ITGA3	Epithelial	NK	0	0.000166277	1.72643	-0.0673099
LAMC2	ITGA6	Epithelial	Epithelial	0	1.81256e-206	1.72643	1.08414
LAMC2	ITGA6	Epithelial	CD8	0	2.95925e-05	1.72643	-0.170167
LAMC2	ITGA6	Epithelial	CD4	0	1.73231e-26	1.72643	-0.37345
LAMC2	ITGA6	Epithelial	Granulocyte	0	5.49129e-19	1.72643	-0.23018
LAMC2	ITGA6	Epithelial	Acinar	0	1.23561e-132	1.72643	-0.20964
LAMC2	ITGA6	Epithelial	Macrophage	0	4.83242e-193	1.72643	-0.266594
LAMC2	ITGA6	Epithelial	Endothelial	0	1.14835e-10	1.72643	0.651675
LAMC2	ITGA6	Epithelial	Pericytes	0	3.37222e-43	1.72643	-0.655421
LAMC2	ITGA6	Epithelial	Mast	0	0.00216001	1.72643	-0.0484321
LAMC2	ITGB1	Epithelial	Epithelial	0	3.15875e-54	1.72643	0.552297
LAMC2	ITGB1	Epithelial	CD8	0	0.0132055	1.72643	0.541011
LAMC2	ITGB1	Epithelial	CD4	0	7.66525e-49	1.72643	1.08703
LAMC2	ITGB1	Epithelial	Granulocyte	0	5.21787e-89	1.72643	-0.981028
LAMC2	ITGB1	Epithelial	Acinar	0	3.99966e-73	1.72643	0.307803
LAMC2	ITGB1	Epithelial	Macrophage	0	7.4765e-110	1.72643	-0.207552
LAMC2	ITGB1	Epithelial	Fibroblast	0	1.11144e-100	1.72643	0.724058
LAMC2	ITGB1	Epithelial	Endothelial	0	6.8745e-22	1.72643	0.822529
LAMC2	ITGB1	Epithelial	B-Cells	0	9.4663e-17	1.72643	-0.118561
LAMC2	ITGB1	Epithelial	Pericytes	0	3.10722e-21	1.72643	0.360213
LAMC2	ITGB4	Epithelial	Epithelial	0	0	1.72643	1.6025
LAMC2	ITGB4	Epithelial	Endothelial	0	9.6259e-09	1.72643	0.481517
LAMC2	ITGB4	Epithelial	Pericytes	0	2.64678e-10	1.72643	-0.00211464
NAMPT	INSR	Fibroblast	CD8	0	6.58315e-17	-2.11829	-0.104825
NAMPT	INSR	Fibroblast	Granulocyte	0	2.04187e-87	-2.11829	-0.885724
NAMPT	INSR	Fibroblast	Acinar	0	5.31197e-230	-2.11829	-0.862442
NAMPT	INSR	Fibroblast	Endothelial	0	1.30169e-53	-2.11829	1.99095
NAMPT	INSR	Fibroblast	Pericytes	0	0.00242262	-2.11829	-0.291108
NAMPT	INSR	Fibroblast	Mast	0	0.00069733	-2.11829	-0.304723
NAMPT	INSR	Fibroblast	Cycling	0	9.64093e-15	-2.11829	-0.166513
NAMPT	INSR	Fibroblast	NK	0	0.000166277	-2.11829	-0.123659
NPNT	ITGA8	Epithelial	Endothelial	0	3.18853e-17	-0.462329	0.245304
NPNT	ITGB1	Epithelial	Epithelial	0	3.15875e-54	-0.462329	0.552297
NPNT	ITGB1	Epithelial	CD8	0	0.0132055	-0.462329	0.541011
NPNT	ITGB1	Epithelial	CD4	0	7.66525e-49	-0.462329	1.08703
NPNT	ITGB1	Epithelial	Granulocyte	0	5.21787e-89	-0.462329	-0.981028
NPNT	ITGB1	Epithelial	Acinar	0	3.99966e-73	-0.462329	0.307803
NPNT	ITGB1	Epithelial	Macrophage	0	7.4765e-110	-0.462329	-0.207552
NPNT	ITGB1	Epithelial	Fibroblast	0	1.11144e-100	-0.462329	0.724058
NPNT	ITGB1	Epithelial	Endothelial	0	6.8745e-22	-0.462329	0.822529
NPNT	ITGB1	Epithelial	B-Cells	0	9.4663e-17	-0.462329	-0.118561
NPNT	ITGB1	Epithelial	Pericytes	0	3.10722e-21	-0.462329	0.360213
NRTN	GFRA1	Epithelial	Epithelial	0	3.24316e-94	-0.188606	-0.020241
NRTN	GFRA1	Epithelial	Granulocyte	0	1.26442e-05	-0.188606	-0.041483
NRTN	GFRA1	Epithelial	Acinar	0	8.79992e-29	-0.188606	-0.107633
NRTN	GFRA1	Epithelial	Fibroblast	0	1.16938e-112	-0.188606	-0.749205
NRTN	GFRA1	Epithelial	Pericytes	0	0.000168063	-0.188606	-0.0856245
NRTN	GFRA2	Epithelial	Macrophage	0	0.0133658	-0.188606	-0.0383947
PDGFC	FLT4	Epithelial	Endothelial	0	0.000515799	-0.487223	0.192258
PDGFC	FLT4	Epithelial	Pericytes	0	3.9109e-21	-0.487223	-0.111999
PDGFC	FLT4	Fibroblast	Endothelial	0	0.000515799	1.428	0.192258
PDGFC	FLT4	Fibroblast	Pericytes	0	3.9109e-21	1.428	-0.111999
PDGFC	KDR	Epithelial	Granulocyte	0	1.03512e-08	-0.487223	-0.134935
PDGFC	KDR	Epithelial	Pericytes	0	8.22889e-47	-0.487223	-0.973168
PDGFC	KDR	Epithelial	NK	0	0.000166277	-0.487223	-0.270649
PDGFC	KDR	Fibroblast	Granulocyte	0	1.03512e-08	1.428	-0.134935
PDGFC	KDR	Fibroblast	Pericytes	0	8.22889e-47	1.428	-0.973168
PDGFC	KDR	Fibroblast	NK	0	0.000166277	1.428	-0.270649
PDGFC	PDGFRA	Epithelial	Epithelial	0	6.5602e-43	-0.487223	0.0417629
PDGFC	PDGFRA	Epithelial	Fibroblast	0	9.72774e-126	-0.487223	-1.47922
PDGFC	PDGFRA	Epithelial	Pericytes	0	3.13006e-09	-0.487223	0.168105
PDGFC	PDGFRA	Fibroblast	Epithelial	0	6.5602e-43	1.428	0.0417629
PDGFC	PDGFRA	Fibroblast	Fibroblast	0	9.72774e-126	1.428	-1.47922
PDGFC	PDGFRA	Fibroblast	Pericytes	0	3.13006e-09	1.428	0.168105
PDGFD	PDGFRB	Epithelial	Pericytes	0	0.00290839	-1.35076	0.229923
PLAT	LRP1	Epithelial	Epithelial	0	1.99124e-148	2.16019	0.475578
PLAT	LRP1	Epithelial	CD8	0	4.54939e-09	2.16019	-0.0610558
PLAT	LRP1	Epithelial	Granulocyte	0	1.48994e-08	2.16019	-0.276267
PLAT	LRP1	Epithelial	Macrophage	0	0	2.16019	-0.548958
PLAT	LRP1	Epithelial	Fibroblast	0	7.27225e-24	2.16019	-0.488639
PLAT	LRP1	Epithelial	Cycling	0	4.47323e-09	2.16019	-0.412677
PLAT	LRP1	Epithelial	NK	0	0.0411012	2.16019	-0.0933615
RGMA	NEO1	Epithelial	Epithelial	0	0	-0.265094	-0.287822
RGMA	NEO1	Epithelial	Acinar	0	3.83044e-27	-0.265094	-0.078798
RGMA	NEO1	Epithelial	Fibroblast	0	8.82569e-61	-0.265094	0.263502
RGMA	NEO1	Epithelial	Pericytes	0	0.0080324	-0.265094	0.150631
RGMA	NEO1	Epithelial	Mast	0	4.27718e-08	-0.265094	-0.223094
RGMA	NEO1	Epithelial	Cycling	0	0.00924711	-0.265094	-0.0963343
RGMA	NEO1	Epithelial	Plasma	0	3.55022e-11	-0.265094	-0.0228834
SEMA3C	NRP2	Epithelial	Epithelial	0	0	0.672035	0.519707
SEMA3C	NRP2	Epithelial	Acinar	0	6.27406e-14	0.672035	0.137129
SEMA3C	NRP2	Epithelial	Fibroblast	0	3.16412e-220	0.672035	0.874384
SEMA3C	NRP2	Epithelial	Endothelial	0	8.34045e-05	0.672035	0.561411
SEMA3C	NRP2	Epithelial	Plasma	0	0.00126413	0.672035	-0.0129276
SEMA3C	NRP1	Epithelial	Epithelial	0	0	0.672035	-0.823164
SEMA3C	NRP1	Epithelial	Acinar	0	3.03869e-08	0.672035	0.049086
SEMA3C	NRP1	Epithelial	Cycling	0	1.56042e-21	0.672035	-0.316068
SEMA3C	PLXND1	Epithelial	Epithelial	0	9.577e-22	0.672035	0.0714054
SEMA3C	PLXND1	Epithelial	CD8	0	1.15261e-06	0.672035	-0.199901
SEMA3C	PLXND1	Epithelial	Granulocyte	0	3.09912e-24	0.672035	-0.230191
SEMA3C	PLXND1	Epithelial	Macrophage	0	9.17056e-292	0.672035	-0.413324
SEMA3C	PLXND1	Epithelial	Endothelial	0	5.27683e-70	0.672035	1.23054
SEMA3C	PLXND1	Epithelial	Cycling	0	5.92897e-14	0.672035	-0.232589
SEMA5A	MET	Epithelial	Epithelial	0	0	-0.207895	1.23366
SEMA5A	MET	Epithelial	Acinar	0	3.12388e-05	-0.207895	0.348485
SEMA5A	MET	Epithelial	Pericytes	0	1.12402e-21	-0.207895	-0.119495
SEMA5A	MET	Epithelial	Cycling	0	3.07355e-06	-0.207895	0.448293
SEMA6D	KDR	Epithelial	Granulocyte	0	1.03512e-08	-0.163303	-0.134935
SEMA6D	KDR	Epithelial	Pericytes	0	8.22889e-47	-0.163303	-0.973168
SEMA6D	KDR	Epithelial	NK	0	0.000166277	-0.163303	-0.270649
SEMA6D	PLXNA1	Epithelial	Epithelial	0	4.78007e-39	-0.163303	0.215749
SEMA6D	PLXNA1	Epithelial	Granulocyte	0	0.00571548	-0.163303	-0.0351335
SEMA6D	PLXNA1	Epithelial	Acinar	0	2.07217e-05	-0.163303	0.0439126
SEMA6D	PLXNA1	Epithelial	Macrophage	0	0.0166738	-0.163303	-0.00243584
SEMA6D	PLXNA1	Epithelial	Endothelial	0	1.74973e-19	-0.163303	0.121833
SEMA6D	TREM2	Epithelial	Granulocyte	0	3.09912e-24	-0.163303	-0.30427
SEMA6D	TREM2	Epithelial	Macrophage	0	1.14134e-123	-0.163303	-0.366187
SEMA6D	TREM2	Epithelial	Cycling	0	1.2982e-26	-0.163303	-0.7292
SEMA6D	TYROBP	Epithelial	Granulocyte	0	6.88262e-21	-0.163303	1.13159
SEMA6D	TYROBP	Epithelial	Acinar	0	5.3467e-11	-0.163303	0.80851
SEMA6D	TYROBP	Epithelial	Cycling	0	1.37194e-12	-0.163303	-0.720341
SERPINA1	LRP1	Epithelial	Epithelial	0	1.99124e-148	-0.62156	0.475578
SERPINA1	LRP1	Epithelial	CD8	0	4.54939e-09	-0.62156	-0.0610558
SERPINA1	LRP1	Epithelial	Granulocyte	0	1.48994e-08	-0.62156	-0.276267
SERPINA1	LRP1	Epithelial	Macrophage	0	0	-0.62156	-0.548958
SERPINA1	LRP1	Epithelial	Fibroblast	0	7.27225e-24	-0.62156	-0.488639
SERPINA1	LRP1	Epithelial	Cycling	0	4.47323e-09	-0.62156	-0.412677
SERPINA1	LRP1	Epithelial	NK	0	0.0411012	-0.62156	-0.0933615
SERPING1	LRP1	Epithelial	Epithelial	0	1.99124e-148	-2.6454	0.475578
SERPING1	LRP1	Epithelial	CD8	0	4.54939e-09	-2.6454	-0.0610558
SERPING1	LRP1	Epithelial	Granulocyte	0	1.48994e-08	-2.6454	-0.276267
SERPING1	LRP1	Epithelial	Macrophage	0	0	-2.6454	-0.548958
SERPING1	LRP1	Epithelial	Fibroblast	0	7.27225e-24	-2.6454	-0.488639
SERPING1	LRP1	Epithelial	Cycling	0	4.47323e-09	-2.6454	-0.412677
SERPING1	LRP1	Epithelial	NK	0	0.0411012	-2.6454	-0.0933615
SERPING1	SELE	Epithelial	Granulocyte	0	0.0162562	-2.6454	-0.0402422
SERPING1	SELP	Epithelial	Endothelial	0	9.67689e-29	-2.6454	1.05612
SPP1	CD44	Epithelial	Epithelial	0	5.21275e-124	-2.43959	-0.169094
SPP1	CD44	Epithelial	CD8	0	1.74454e-19	-2.43959	0.512652
SPP1	CD44	Epithelial	CD4	0	1.30883e-18	-2.43959	0.511945
SPP1	CD44	Epithelial	Acinar	0	1.6862e-41	-2.43959	0.663397
SPP1	CD44	Epithelial	Macrophage	0	1.2466e-64	-2.43959	0.786408
SPP1	CD44	Epithelial	Fibroblast	0	4.87529e-23	-2.43959	-0.734852
SPP1	CD44	Epithelial	Pericytes	0	3.40416e-13	-2.43959	0.406512
SPP1	CD44	Epithelial	Mast	0	1.43683e-15	-2.43959	0.858086
SPP1	CD44	Epithelial	Cycling	0	0.0208429	-2.43959	0.0151378
SPP1	ITGAV	Epithelial	Epithelial	0	5.12409e-210	-2.43959	-0.210961
SPP1	ITGAV	Epithelial	CD8	0	6.67778e-18	-2.43959	-0.122785
SPP1	ITGAV	Epithelial	Granulocyte	0	2.38354e-30	-2.43959	-0.402545
SPP1	ITGAV	Epithelial	Acinar	0	1.93424e-18	-2.43959	0.175201
SPP1	ITGAV	Epithelial	Macrophage	0	7.78039e-303	-2.43959	-0.469458
SPP1	ITGAV	Epithelial	Fibroblast	0	1.66879e-78	-2.43959	0.505525
SPP1	ITGAV	Epithelial	Endothelial	0	0.000369087	-2.43959	0.298994
SPP1	ITGAV	Epithelial	Pericytes	0	6.6043e-67	-2.43959	0.939974
SPP1	ITGAV	Epithelial	Cycling	0	1.4896e-29	-2.43959	-0.321895
SPP1	ITGA4	Epithelial	Epithelial	0	0.000411333	-2.43959	0.0071396
SPP1	ITGA4	Epithelial	CD8	0	0.013142	-2.43959	0.29551
SPP1	ITGA4	Epithelial	CD4	0	1.9479e-10	-2.43959	0.560218
SPP1	ITGA4	Epithelial	Acinar	0	1.52282e-10	-2.43959	0.360247
SPP1	ITGA4	Epithelial	Macrophage	0	1.27267e-156	-2.43959	-0.0212363
SPP1	ITGA4	Epithelial	Fibroblast	0	8.52213e-08	-2.43959	0.047186
SPP1	ITGA4	Epithelial	Plasma	0	6.69632e-17	-2.43959	-0.0366525
SPP1	ITGA5	Epithelial	Epithelial	0	0	-2.43959	-0.162179
SPP1	ITGA5	Epithelial	Acinar	0	6.25867e-13	-2.43959	0.858009
SPP1	ITGA5	Epithelial	Macrophage	0	6.97981e-79	-2.43959	-0.126124
SPP1	ITGA5	Epithelial	Endothelial	0	2.3746e-48	-2.43959	1.06539
SPP1	ITGA5	Epithelial	Cycling	0	1.27181e-24	-2.43959	-0.228415
SPP1	ITGA9	Epithelial	Macrophage	0	2.77903e-212	-2.43959	-0.240045
SPP1	ITGA9	Epithelial	Fibroblast	0	4.79553e-20	-2.43959	0.0746288
SPP1	ITGA9	Epithelial	Pericytes	0	4.52297e-12	-2.43959	-0.0831755
SPP1	ITGA9	Epithelial	Cycling	0	8.24694e-10	-2.43959	-0.0847481
SPP1	ITGB1	Epithelial	Epithelial	0	3.15875e-54	-2.43959	0.552297
SPP1	ITGB1	Epithelial	CD8	0	0.0132055	-2.43959	0.541011
SPP1	ITGB1	Epithelial	CD4	0	7.66525e-49	-2.43959	1.08703
SPP1	ITGB1	Epithelial	Granulocyte	0	5.21787e-89	-2.43959	-0.981028
SPP1	ITGB1	Epithelial	Acinar	0	3.99966e-73	-2.43959	0.307803
SPP1	ITGB1	Epithelial	Macrophage	0	7.4765e-110	-2.43959	-0.207552
SPP1	ITGB1	Epithelial	Fibroblast	0	1.11144e-100	-2.43959	0.724058
SPP1	ITGB1	Epithelial	Endothelial	0	6.8745e-22	-2.43959	0.822529
SPP1	ITGB1	Epithelial	B-Cells	0	9.4663e-17	-2.43959	-0.118561
SPP1	ITGB1	Epithelial	Pericytes	0	3.10722e-21	-2.43959	0.360213
SPP1	S1PR1	Epithelial	CD8	0	5.06468e-05	-2.43959	0.224369
SPP1	S1PR1	Epithelial	Granulocyte	0	6.44539e-18	-2.43959	-0.227394
SPP1	S1PR1	Epithelial	Pericytes	0	1.37329e-45	-2.43959	-0.638367
TGM2	ADGRG1	Epithelial	Epithelial	0	1.76265e-28	1.66862	0.415817
TGM2	ADGRG1	Epithelial	CD8	0	3.03112e-10	1.66862	0.40071
TGM2	ADGRG1	Epithelial	Granulocyte	0	4.31777e-27	1.66862	-0.184436
TGM2	ADGRG1	Epithelial	Acinar	0	1.53249e-59	1.66862	-0.0356028
TGM2	ADGRG1	Epithelial	Macrophage	0	5.45051e-77	1.66862	-0.11444
TGM2	ADGRG1	Epithelial	Pericytes	0	4.67709e-14	1.66862	-0.41948
TGM2	ITGB1	Epithelial	Epithelial	0	3.15875e-54	1.66862	0.552297
TGM2	ITGB1	Epithelial	CD8	0	0.0132055	1.66862	0.541011
TGM2	ITGB1	Epithelial	CD4	0	7.66525e-49	1.66862	1.08703
TGM2	ITGB1	Epithelial	Granulocyte	0	5.21787e-89	1.66862	-0.981028
TGM2	ITGB1	Epithelial	Acinar	0	3.99966e-73	1.66862	0.307803
TGM2	ITGB1	Epithelial	Macrophage	0	7.4765e-110	1.66862	-0.207552
TGM2	ITGB1	Epithelial	Fibroblast	0	1.11144e-100	1.66862	0.724058
TGM2	ITGB1	Epithelial	Endothelial	0	6.8745e-22	1.66862	0.822529
TGM2	ITGB1	Epithelial	B-Cells	0	9.4663e-17	1.66862	-0.118561
TGM2	ITGB1	Epithelial	Pericytes	0	3.10722e-21	1.66862	0.360213
TGM2	ITGB3	Epithelial	Epithelial	0	2.0559e-09	1.66862	0.00834496
TGM2	ITGB3	Epithelial	Fibroblast	0	1.77126e-17	1.66862	-0.198842
TGM2	ITGB3	Epithelial	Endothelial	0	0.00462729	1.66862	0.0993298
TGM2	ITGB3	Epithelial	Pericytes	0	2.02529e-07	1.66862	0.136001
TGM2	SDC4	Epithelial	Epithelial	0	4.69037e-17	1.66862	0.509224
TGM2	SDC4	Epithelial	Granulocyte	0	4.01801e-08	1.66862	-0.188799
TGM2	SDC4	Epithelial	Acinar	0	3.48401e-46	1.66862	0.244596
TGM2	SDC4	Epithelial	Macrophage	0	1.34193e-27	1.66862	0.213748
TGM2	SDC4	Epithelial	Fibroblast	0	3.79815e-143	1.66862	-0.693862
TGM2	SDC4	Epithelial	NK	0	5.86284e-10	1.66862	-0.256696
TNFSF12	TNFRSF12A	Epithelial	Epithelial	0	1.59475e-60	-0.283895	-0.224886
TNFSF12	TNFRSF12A	Epithelial	Granulocyte	0	6.1498e-27	-0.283895	-0.401309
TNFSF12	TNFRSF12A	Epithelial	Acinar	0	1.03321e-15	-0.283895	-0.0383474
TNFSF12	TNFRSF12A	Epithelial	Fibroblast	0	6.3312e-23	-0.283895	0.00695107
TNFSF12	TNFRSF25	Epithelial	Epithelial	0	7.13323e-20	-0.283895	0.0521987
TNFSF12	TNFRSF25	Epithelial	CD8	0	3.06583e-07	-0.283895	0.308965
TNFSF12	TNFRSF25	Epithelial	CD4	0	1.18019e-25	-0.283895	0.604983
TNFSF12	TNFRSF25	Epithelial	Macrophage	0	1.69028e-27	-0.283895	-0.0229687
TNFSF12	TNFRSF25	Epithelial	Endothelial	0	5.81905e-09	-0.283895	0.167324
TNFSF12	TNFRSF25	Epithelial	Pericytes	0	9.95033e-05	-0.283895	-0.0377515
VCAM1	ITGA4	Epithelial	Epithelial	0	0.000411333	-0.501161	0.0071396
VCAM1	ITGA4	Epithelial	CD8	0	0.013142	-0.501161	0.29551
VCAM1	ITGA4	Epithelial	CD4	0	1.9479e-10	-0.501161	0.560218
VCAM1	ITGA4	Epithelial	Acinar	0	1.52282e-10	-0.501161	0.360247
VCAM1	ITGA4	Epithelial	Macrophage	0	1.27267e-156	-0.501161	-0.0212363
VCAM1	ITGA4	Epithelial	Fibroblast	0	8.52213e-08	-0.501161	0.047186
VCAM1	ITGA4	Epithelial	Plasma	0	6.69632e-17	-0.501161	-0.0366525
VCAM1	ITGAD	Epithelial	Acinar	0	1.31306e-05	-0.501161	0.069714
VCAM1	ITGB1	Epithelial	Epithelial	0	3.15875e-54	-0.501161	0.552297
VCAM1	ITGB1	Epithelial	CD8	0	0.0132055	-0.501161	0.541011
VCAM1	ITGB1	Epithelial	CD4	0	7.66525e-49	-0.501161	1.08703
VCAM1	ITGB1	Epithelial	Granulocyte	0	5.21787e-89	-0.501161	-0.981028
VCAM1	ITGB1	Epithelial	Acinar	0	3.99966e-73	-0.501161	0.307803
VCAM1	ITGB1	Epithelial	Macrophage	0	7.4765e-110	-0.501161	-0.207552
VCAM1	ITGB1	Epithelial	Fibroblast	0	1.11144e-100	-0.501161	0.724058
VCAM1	ITGB1	Epithelial	Endothelial	0	6.8745e-22	-0.501161	0.822529
VCAM1	ITGB1	Epithelial	B-Cells	0	9.4663e-17	-0.501161	-0.118561
VCAM1	ITGB1	Epithelial	Pericytes	0	3.10722e-21	-0.501161	0.360213
VCAM1	ITGB2	Epithelial	CD8	0	4.44859e-05	-0.501161	0.545658
VCAM1	ITGB2	Epithelial	Acinar	0	1.45726e-05	-0.501161	0.542202
VCAM1	ITGB2	Epithelial	Macrophage	0	7.63401e-100	-0.501161	-0.233667
VCAM1	ITGB2	Epithelial	Fibroblast	0	1.41187e-07	-0.501161	0.119113
VCAM1	ITGB2	Epithelial	Cycling	0	7.42316e-12	-0.501161	-0.608555
VCAM1	ITGB2	Epithelial	Plasma	0	2.10606e-14	-0.501161	-0.0663268
VCAM1	ITGB7	Epithelial	CD8	0	8.30012e-16	-0.501161	0.4236
VCAM1	ITGB7	Epithelial	CD4	0	6.87747e-20	-0.501161	0.339348
VCAM1	ITGB7	Epithelial	Macrophage	0	5.22074e-29	-0.501161	0.210669
VCAM1	ITGB7	Epithelial	Cycling	0	0.0449845	-0.501161	0.426806
VTN	ITGA5	Epithelial	Epithelial	0	0	-1.06646	-0.162179
VTN	ITGA5	Epithelial	Acinar	0	6.25867e-13	-1.06646	0.858009
VTN	ITGA5	Epithelial	Macrophage	0	6.97981e-79	-1.06646	-0.126124
VTN	ITGA5	Epithelial	Endothelial	0	2.3746e-48	-1.06646	1.06539
VTN	ITGA5	Epithelial	Cycling	0	1.27181e-24	-1.06646	-0.228415
VTN	ITGB3	Epithelial	Epithelial	0	2.0559e-09	-1.06646	0.00834496
VTN	ITGB3	Epithelial	Fibroblast	0	1.77126e-17	-1.06646	-0.198842
VTN	ITGB3	Epithelial	Endothelial	0	0.00462729	-1.06646	0.0993298
VTN	ITGB3	Epithelial	Pericytes	0	2.02529e-07	-1.06646	0.136001
VTN	ITGA8	Epithelial	Endothelial	0	3.18853e-17	-1.06646	0.245304
VTN	ITGAV	Epithelial	Epithelial	0	5.12409e-210	-1.06646	-0.210961
VTN	ITGAV	Epithelial	CD8	0	6.67778e-18	-1.06646	-0.122785
VTN	ITGAV	Epithelial	Granulocyte	0	2.38354e-30	-1.06646	-0.402545
VTN	ITGAV	Epithelial	Acinar	0	1.93424e-18	-1.06646	0.175201
VTN	ITGAV	Epithelial	Macrophage	0	7.78039e-303	-1.06646	-0.469458
VTN	ITGAV	Epithelial	Fibroblast	0	1.66879e-78	-1.06646	0.505525
VTN	ITGAV	Epithelial	Endothelial	0	0.000369087	-1.06646	0.298994
VTN	ITGAV	Epithelial	Pericytes	0	6.6043e-67	-1.06646	0.939974
VTN	ITGAV	Epithelial	Cycling	0	1.4896e-29	-1.06646	-0.321895
VTN	ITGB6	Epithelial	Epithelial	0	2.47404e-239	-1.06646	1.40563
VTN	ITGB6	Epithelial	Cycling	0	0.0281678	-1.06646	0.515915
VTN	PLAUR	Epithelial	Epithelial	0	0	-1.06646	1.27925
VTN	PLAUR	Epithelial	Granulocyte	0	1.02078e-25	-1.06646	1.53765
VTN	PLAUR	Epithelial	Acinar	0	3.13011e-233	-1.06646	1.90858
VTN	PLAUR	Epithelial	Fibroblast	0	2.80123e-05	-1.06646	0.0900659
VTN	PLAUR	Epithelial	Pericytes	0	4.50724e-07	-1.06646	0.00454997
VTN	PVR	Epithelial	Epithelial	0	5.95206e-19	-1.06646	0.213477
VTN	PVR	Epithelial	Granulocyte	0	0.030075	-1.06646	-0.173302
VTN	PVR	Epithelial	Acinar	0	4.41447e-22	-1.06646	-0.128341
VTN	PVR	Epithelial	Fibroblast	0	1.65143e-06	-1.06646	0.00659887
VTN	PVR	Epithelial	Endothelial	0	0.016964	-1.06646	0.118656
VTN	TNFRSF11B	Epithelial	Epithelial	0	5.11409e-19	-1.06646	0.351232
VTN	TNFRSF11B	Epithelial	Fibroblast	0	0.00318907	-1.06646	0.0650777
VTN	TNFRSF11B	Epithelial	Endothelial	0	1.90637e-18	-1.06646	0.18246
VTN	TNFRSF11B	Epithelial	Pericytes	0	6.32699e-24	-1.06646	0.280972
VTN	TNFRSF11B	Epithelial	Plasma	0	0.00126413	-1.06646	-0.0136624
ADAM28	ITGA4	Epithelial	Epithelial	0	0.000411333	0.622455	0.0071396
ADAM28	ITGA4	Epithelial	CD8	0	0.013142	0.622455	0.29551
ADAM28	ITGA4	Epithelial	CD4	0	1.9479e-10	0.622455	0.560218
ADAM28	ITGA4	Epithelial	Acinar	0	1.52282e-10	0.622455	0.360247
ADAM28	ITGA4	Epithelial	Macrophage	0	1.27267e-156	0.622455	-0.0212363
ADAM28	ITGA4	Epithelial	Fibroblast	0	8.52213e-08	0.622455	0.047186
ADAM28	ITGA4	Epithelial	Plasma	0	6.69632e-17	0.622455	-0.0366525
B2M	CD1A	Epithelial	Macrophage	0	2.619e-12	1.36096	0.111851
B2M	CD1B	Epithelial	Macrophage	0	2.63666e-19	1.36096	0.0919284
B2M	HFE	Epithelial	Epithelial	0	2.0885e-35	1.36096	-0.0287922
B2M	HFE	Epithelial	Acinar	0	5.6544e-06	1.36096	-0.0301832
B2M	HLA-F	Epithelial	Epithelial	0	6.04051e-22	1.36096	0.34437
B2M	HLA-F	Epithelial	Acinar	0	1.85849e-24	1.36096	0.845817
B2M	HLA-F	Epithelial	Endothelial	0	4.23735e-35	1.36096	-1.11283
B2M	HLA-F	Epithelial	B-Cells	0	1.24396e-05	1.36096	-0.191982
B2M	LILRB1	Epithelial	Epithelial	0	0.0185548	1.36096	-0.0058109
B2M	LILRB1	Epithelial	Macrophage	0	3.18612e-107	1.36096	-0.139068
B2M	LILRB1	Epithelial	Endothelial	0	0.000467896	1.36096	0.0193139
B2M	LILRB1	Epithelial	Cycling	0	5.4596e-15	1.36096	-0.221917
C4BPA	BMPR2	Epithelial	Epithelial	0	0.000221682	-0.321687	0.270654
C4BPA	BMPR2	Epithelial	Granulocyte	0	5.42851e-14	-0.321687	-0.347993
C4BPA	BMPR2	Epithelial	Acinar	0	3.0953e-37	-0.321687	0.0462386
C4BPA	BMPR2	Epithelial	Macrophage	0	1.74144e-139	-0.321687	-0.221181
C4BPA	BMPR2	Epithelial	Fibroblast	0	4.84215e-55	-0.321687	0.477772
C4BPA	BMPR2	Epithelial	Endothelial	0	1.84512e-06	-0.321687	0.50489
C4BPA	BMPR2	Epithelial	Cycling	0	0.00167208	-0.321687	-0.0635535
C4BPA	CD40	Epithelial	CD8	0	7.25089e-06	-0.321687	-0.0332223
C4BPA	CD40	Epithelial	Granulocyte	0	1.24293e-06	-0.321687	-0.251731
C4BPA	CD40	Epithelial	Acinar	0	1.41203e-32	-0.321687	-0.0270423
C4BPA	CD40	Epithelial	Macrophage	0	6.34563e-176	-0.321687	0.449771
C4BPA	CD40	Epithelial	Fibroblast	0	7.39218e-32	-0.321687	-0.300452
C4BPA	CD40	Epithelial	B-Cells	0	1.80368e-05	-0.321687	0.385189
C4BPA	LRP1	Epithelial	Epithelial	0	1.99124e-148	-0.321687	0.475578
C4BPA	LRP1	Epithelial	CD8	0	4.54939e-09	-0.321687	-0.0610558
C4BPA	LRP1	Epithelial	Granulocyte	0	1.48994e-08	-0.321687	-0.276267
C4BPA	LRP1	Epithelial	Macrophage	0	0	-0.321687	-0.548958
C4BPA	LRP1	Epithelial	Fibroblast	0	7.27225e-24	-0.321687	-0.488639
C4BPA	LRP1	Epithelial	Cycling	0	4.47323e-09	-0.321687	-0.412677
C4BPA	LRP1	Epithelial	NK	0	0.0411012	-0.321687	-0.0933615
CEL	CXCR4	Epithelial	Epithelial	0	0.000121241	-4.34958	0.202302
CEL	CXCR4	Epithelial	CD8	0	2.90307e-57	-4.34958	0.825534
CEL	CXCR4	Epithelial	CD4	0	2.08823e-55	-4.34958	0.980764
CEL	CXCR4	Epithelial	Acinar	0	0	-4.34958	2.86465
CEL	CXCR4	Epithelial	Macrophage	0	2.57198e-12	-4.34958	0.624931
CEL	CXCR4	Epithelial	Fibroblast	0	0.0147191	-4.34958	-0.160083
CEL	CXCR4	Epithelial	B-Cells	0	3.36631e-67	-4.34958	0.938636
CEL	CXCR4	Epithelial	Mast	0	5.72597e-27	-4.34958	-2.12022
CEL	CXCR4	Epithelial	Plasma	0	4.77979e-88	-4.34958	-0.755055
CEL	CXCR4	Granulocyte	Epithelial	0	0.000121241	-5.23778	0.202302
CEL	CXCR4	Granulocyte	CD8	0	2.90307e-57	-5.23778	0.825534
CEL	CXCR4	Granulocyte	CD4	0	2.08823e-55	-5.23778	0.980764
CEL	CXCR4	Granulocyte	Acinar	0	0	-5.23778	2.86465
CEL	CXCR4	Granulocyte	Macrophage	0	2.57198e-12	-5.23778	0.624931
CEL	CXCR4	Granulocyte	Fibroblast	0	0.0147191	-5.23778	-0.160083
CEL	CXCR4	Granulocyte	B-Cells	0	3.36631e-67	-5.23778	0.938636
CEL	CXCR4	Granulocyte	Mast	0	5.72597e-27	-5.23778	-2.12022
CEL	CXCR4	Granulocyte	Plasma	0	4.77979e-88	-5.23778	-0.755055
CEL	CXCR4	Acinar	Epithelial	0	0.000121241	-2.56593	0.202302
CEL	CXCR4	Acinar	CD8	0	2.90307e-57	-2.56593	0.825534
CEL	CXCR4	Acinar	CD4	0	2.08823e-55	-2.56593	0.980764
CEL	CXCR4	Acinar	Acinar	0	0	-2.56593	2.86465
CEL	CXCR4	Acinar	Macrophage	0	2.57198e-12	-2.56593	0.624931
CEL	CXCR4	Acinar	Fibroblast	0	0.0147191	-2.56593	-0.160083
CEL	CXCR4	Acinar	B-Cells	0	3.36631e-67	-2.56593	0.938636
CEL	CXCR4	Acinar	Mast	0	5.72597e-27	-2.56593	-2.12022
CEL	CXCR4	Acinar	Plasma	0	4.77979e-88	-2.56593	-0.755055
COL1A2	CD36	Fibroblast	Epithelial	0	0.00280973	2.6598	-0.059447
COL1A2	CD36	Fibroblast	CD4	0	0.0217507	2.6598	-0.118653
COL1A2	CD36	Fibroblast	Granulocyte	0	1.71159e-26	2.6598	-0.326375
COL1A2	CD36	Fibroblast	Macrophage	0	7.77383e-11	2.6598	0.359012
COL1A2	CD36	Fibroblast	Fibroblast	0	1.53056e-10	2.6598	-0.641524
COL1A2	CD36	Fibroblast	Endothelial	0	5.44668e-61	2.6598	-1.57348
COL1A2	CD36	Fibroblast	Pericytes	0	1.63477e-83	2.6598	-3.00413
COL1A2	CD36	Fibroblast	Cycling	0	1.75634e-07	2.6598	-0.229692
COL1A2	CD36	Fibroblast	NK	0	3.092e-07	2.6598	-0.809006
COL1A2	CD44	Fibroblast	Epithelial	0	5.21275e-124	2.6598	-0.169094
COL1A2	CD44	Fibroblast	CD8	0	1.74454e-19	2.6598	0.512652
COL1A2	CD44	Fibroblast	CD4	0	1.30883e-18	2.6598	0.511945
COL1A2	CD44	Fibroblast	Acinar	0	1.6862e-41	2.6598	0.663397
COL1A2	CD44	Fibroblast	Macrophage	0	1.2466e-64	2.6598	0.786408
COL1A2	CD44	Fibroblast	Fibroblast	0	4.87529e-23	2.6598	-0.734852
COL1A2	CD44	Fibroblast	Pericytes	0	3.40416e-13	2.6598	0.406512
COL1A2	CD44	Fibroblast	Mast	0	1.43683e-15	2.6598	0.858086
COL1A2	CD44	Fibroblast	Cycling	0	0.0208429	2.6598	0.0151378
COL1A2	CD93	Fibroblast	CD8	0	6.91724e-06	2.6598	-0.0438169
COL1A2	CD93	Fibroblast	Acinar	0	1.22953e-60	2.6598	1.00255
COL1A2	CD93	Fibroblast	Macrophage	0	3.55082e-135	2.6598	-0.246845
COL1A2	CD93	Fibroblast	Endothelial	0	1.89637e-43	2.6598	1.01974
COL1A2	CD93	Fibroblast	Pericytes	0	6.63421e-47	2.6598	-0.847037
COL1A2	CD93	Fibroblast	Cycling	0	5.09373e-23	2.6598	-0.432069
COL1A2	CD93	Fibroblast	NK	0	1.8931e-05	2.6598	-0.167809
COL1A2	ITGA2	Fibroblast	Epithelial	0	0	2.6598	1.51184
COL1A2	ITGA2	Fibroblast	CD8	0	0.001315	2.6598	-0.0424823
COL1A2	ITGA2	Fibroblast	Granulocyte	0	1.26442e-05	2.6598	-0.105921
COL1A2	ITGA2	Fibroblast	Fibroblast	0	1.09254e-49	2.6598	0.292511
COL1A2	ITGA2	Fibroblast	Endothelial	0	2.74857e-49	2.6598	0.623198
COL1A2	ITGB3	Fibroblast	Epithelial	0	2.0559e-09	2.6598	0.00834496
COL1A2	ITGB3	Fibroblast	Fibroblast	0	1.77126e-17	2.6598	-0.198842
COL1A2	ITGB3	Fibroblast	Endothelial	0	0.00462729	2.6598	0.0993298
COL1A2	ITGB3	Fibroblast	Pericytes	0	2.02529e-07	2.6598	0.136001
COL3A1	DDR1	Fibroblast	Epithelial	0	1.93137e-37	2.62326	0.0944046
COL3A1	DDR1	Fibroblast	Granulocyte	0	4.91559e-24	2.62326	-0.24638
COL3A1	DDR1	Fibroblast	Acinar	0	4.56989e-53	2.62326	-0.0504608
COL3A1	DDR1	Fibroblast	Pericytes	0	0.00484717	2.62326	0.0631909
COL3A1	DDR1	Fibroblast	Cycling	0	0.000284406	2.62326	-0.0746372
COL3A1	DDR2	Fibroblast	Acinar	0	3.64769e-06	2.62326	-0.0825654
COL3A1	DDR2	Fibroblast	Macrophage	0	2.43097e-05	2.62326	-0.0092581
COL3A1	DDR2	Fibroblast	Fibroblast	0	3.11134e-53	2.62326	0.280774
COL3A1	DDR2	Fibroblast	Pericytes	0	1.10569e-14	2.62326	0.33162
COL4A2	CD93	Epithelial	CD8	0	6.91724e-06	-0.51919	-0.0438169
COL4A2	CD93	Epithelial	Acinar	0	1.22953e-60	-0.51919	1.00255
COL4A2	CD93	Epithelial	Macrophage	0	3.55082e-135	-0.51919	-0.246845
COL4A2	CD93	Epithelial	Endothelial	0	1.89637e-43	-0.51919	1.01974
COL4A2	CD93	Epithelial	Pericytes	0	6.63421e-47	-0.51919	-0.847037
COL4A2	CD93	Epithelial	Cycling	0	5.09373e-23	-0.51919	-0.432069
COL4A2	CD93	Epithelial	NK	0	1.8931e-05	-0.51919	-0.167809
COL8A1	ITGA1	Fibroblast	Epithelial	0	2.92103e-168	2.10751	0.296371
COL8A1	ITGA1	Fibroblast	CD8	0	2.87087e-05	2.10751	0.411396
COL8A1	ITGA1	Fibroblast	Macrophage	0	9.37225e-06	2.10751	-0.0154248
COL8A1	ITGA1	Fibroblast	Fibroblast	0	6.49626e-116	2.10751	0.898987
COL8A1	ITGA1	Fibroblast	Pericytes	0	8.59805e-17	2.10751	0.450837
COL8A1	ITGA1	Fibroblast	Cycling	0	4.83249e-07	2.10751	0.501826
COL8A1	ITGA2	Fibroblast	Epithelial	0	0	2.10751	1.51184
COL8A1	ITGA2	Fibroblast	CD8	0	0.001315	2.10751	-0.0424823
COL8A1	ITGA2	Fibroblast	Granulocyte	0	1.26442e-05	2.10751	-0.105921
COL8A1	ITGA2	Fibroblast	Fibroblast	0	1.09254e-49	2.10751	0.292511
COL8A1	ITGA2	Fibroblast	Endothelial	0	2.74857e-49	2.10751	0.623198
CTHRC1	FZD3	Fibroblast	Epithelial	0	0	3.17288	-0.181448
CTHRC1	FZD3	Fibroblast	CD8	0	3.54235e-09	3.17288	-0.13042
CTHRC1	FZD3	Fibroblast	Granulocyte	0	2.2335e-13	3.17288	-0.164548
CTHRC1	FZD3	Fibroblast	Acinar	0	5.65601e-55	3.17288	-0.155023
CTHRC1	FZD3	Fibroblast	Macrophage	0	1.93411e-13	3.17288	-0.0153685
CTHRC1	FZD3	Fibroblast	Cycling	0	1.05745e-14	3.17288	-0.0792099
CTHRC1	FZD5	Fibroblast	Epithelial	0	1.14509e-225	3.17288	-0.269513
CTHRC1	FZD5	Fibroblast	Granulocyte	0	1.16205e-11	3.17288	-0.167559
CTHRC1	FZD5	Fibroblast	Acinar	0	5.04932e-40	3.17288	0.012045
CTHRC1	FZD5	Fibroblast	Macrophage	0	3.81357e-68	3.17288	-0.0937041
CTHRC1	FZD5	Fibroblast	Pericytes	0	0.0328199	3.17288	0.0190372
CTHRC1	FZD5	Fibroblast	Cycling	0	2.08173e-05	3.17288	-0.0995368
CTHRC1	FZD5	Fibroblast	Plasma	0	0.0233008	3.17288	-0.00893957
CTHRC1	FZD6	Fibroblast	Epithelial	0	5.46488e-169	3.17288	-0.19728
CTHRC1	FZD6	Fibroblast	Granulocyte	0	0.00056156	3.17288	-0.0669801
CTHRC1	FZD6	Fibroblast	Acinar	0	7.66387e-20	3.17288	-0.0434199
CTHRC1	FZD6	Fibroblast	Macrophage	0	3.44881e-06	3.17288	-0.0100801
CTHRC1	FZD6	Fibroblast	Fibroblast	0	6.12476e-105	3.17288	0.242465
CTHRC1	FZD6	Fibroblast	Endothelial	0	4.07596e-07	3.17288	0.402333
DEFB1	CCR6	Epithelial	Epithelial	0	8.95052e-05	-1.21694	0.0228123
DEFB1	CCR6	Epithelial	CD4	0	1.355e-41	-1.21694	0.651017
DEFB1	CCR6	Epithelial	Macrophage	0	5.05365e-77	-1.21694	0.186366
DEFB1	CCR6	Epithelial	Cycling	0	5.47862e-06	-1.21694	0.165574
DEFB1	CCR6	Epithelial	Plasma	0	2.80016e-07	-1.21694	-0.0329877
EFEMP1	EGFR	Epithelial	Epithelial	0	3.83547e-75	-0.188899	-0.022278
EFEMP1	EGFR	Epithelial	Granulocyte	0	7.46215e-15	-0.188899	-0.150645
EFEMP1	EGFR	Epithelial	Acinar	0	2.41989e-55	-0.188899	-0.112528
EFEMP1	EGFR	Epithelial	Macrophage	0	1.03082e-16	-0.188899	-0.0150589
EFEMP1	EGFR	Epithelial	Fibroblast	0	1.29059e-185	-0.188899	-1.24907
EFEMP1	EGFR	Epithelial	Pericytes	0	1.34765e-05	-0.188899	-0.210215
EFEMP2	AQP1	Epithelial	Epithelial	0	0	-0.679918	-2.9413
EFEMP2	AQP1	Epithelial	Granulocyte	0	3.48738e-85	-0.679918	-0.805558
EFEMP2	AQP1	Epithelial	Acinar	0	6.05409e-29	-0.679918	-0.394064
EFEMP2	AQP1	Epithelial	Macrophage	0	0.0163536	-0.679918	-0.0246553
EFEMP2	AQP1	Epithelial	Mast	0	0.00216001	-0.679918	-0.16057
EFEMP2	AQP1	Epithelial	Cycling	0	7.87911e-41	-0.679918	-1.46211
EFEMP2	AQP1	Epithelial	NK	0	0.000166277	-0.679918	-0.580299
EFEMP2	CATSPER1	Epithelial	Epithelial	0	3.97378e-178	-0.679918	0.118252
EFEMP2	CATSPER1	Epithelial	Macrophage	0	3.00103e-117	-0.679918	-0.17186
EFEMP2	CATSPER1	Epithelial	Cycling	0	0.0130105	-0.679918	-0.0590075
EFEMP2	LINGO1	Epithelial	Epithelial	0	6.37664e-57	-0.679918	-0.0193677
EFEMP2	LINGO1	Epithelial	Acinar	0	3.9173e-07	-0.679918	-0.0142384
EFEMP2	LINGO1	Epithelial	Pericytes	0	3.27575e-19	-0.679918	0.389817
EFEMP2	PLSCR4	Epithelial	Epithelial	0	1.5628e-248	-0.679918	-0.211728
EFEMP2	PLSCR4	Epithelial	Granulocyte	0	1.03512e-08	-0.679918	-0.07368
EFEMP2	PLSCR4	Epithelial	Acinar	0	1.03652e-39	-0.679918	-0.0288128
EFEMP2	PLSCR4	Epithelial	Macrophage	0	0.0146004	-0.679918	0.00607576
EFEMP2	PLSCR4	Epithelial	Fibroblast	0	0.000104309	-0.679918	0.114294
EFEMP2	PLSCR4	Epithelial	Endothelial	0	5.68569e-10	-0.679918	-0.454614
EFEMP2	PLSCR4	Epithelial	Cycling	0	0.012627	-0.679918	-0.0852629
HMGB1	SDC1	Macrophage	Epithelial	0	4.00362e-154	-0.526137	0.949572
HMGB1	SDC1	Macrophage	Fibroblast	0	3.03355e-141	-0.526137	0.936202
HMGB1	THBD	Macrophage	Epithelial	0	3.61019e-180	-0.526137	0.191015
HMGB1	THBD	Macrophage	Acinar	0	2.49167e-17	-0.526137	0.517101
HMGB1	THBD	Macrophage	Macrophage	0	3.34485e-12	-0.526137	-0.00665882
HMGB1	THBD	Macrophage	Fibroblast	0	0.0325729	-0.526137	-0.330673
HMGB1	THBD	Macrophage	Endothelial	0	4.25998e-18	-0.526137	-1.04388
HMGB1	THBD	Macrophage	Pericytes	0	1.43312e-50	-0.526137	-0.686558
HMGB1	THBD	Macrophage	NK	0	0.000166277	-0.526137	-0.0673099
IGFBP4	FZD8	Epithelial	Epithelial	0	0	0.983338	-0.265578
IGFBP4	FZD8	Epithelial	Granulocyte	0	1.03512e-08	0.983338	-0.151653
IGFBP4	FZD8	Epithelial	Acinar	0	4.27677e-19	0.983338	-0.0357248
IGFBP4	FZD8	Epithelial	Fibroblast	0	9.47482e-08	0.983338	0.0070723
IGFBP4	FZD8	Epithelial	Pericytes	0	0.000705533	0.983338	-0.0912915
IGFBP4	FZD8	Epithelial	Cycling	0	1.40223e-20	0.983338	-0.162743
IGFBP4	LRP6	Epithelial	Epithelial	0	1.68785e-200	0.983338	-0.150105
IGFBP4	LRP6	Epithelial	CD4	0	0.000477955	0.983338	-0.0197302
IGFBP4	LRP6	Epithelial	Granulocyte	0	2.58065e-18	0.983338	-0.181177
IGFBP4	LRP6	Epithelial	Acinar	0	1.94612e-59	0.983338	-0.15918
IGFBP4	LRP6	Epithelial	Fibroblast	0	8.03492e-06	0.983338	0.0779095
IGFBP4	LRP6	Epithelial	Endothelial	0	1.26092e-31	0.983338	0.449149
LAMA3	SDC2	Epithelial	Epithelial	0	0	1.21357	-0.579712
LAMA3	SDC2	Epithelial	Granulocyte	0	1.267e-21	1.21357	-0.348546
LAMA3	SDC2	Epithelial	Acinar	0	2.15164e-127	1.21357	-0.204166
LAMA3	SDC2	Epithelial	Pericytes	0	1.11445e-86	1.21357	1.10568
LAMA3	SDC2	Epithelial	Cycling	0	1.71993e-53	1.21357	-0.281254
MFGE8	ITGAV	Epithelial	Epithelial	0	5.12409e-210	0.429973	-0.210961
MFGE8	ITGAV	Epithelial	CD8	0	6.67778e-18	0.429973	-0.122785
MFGE8	ITGAV	Epithelial	Granulocyte	0	2.38354e-30	0.429973	-0.402545
MFGE8	ITGAV	Epithelial	Acinar	0	1.93424e-18	0.429973	0.175201
MFGE8	ITGAV	Epithelial	Macrophage	0	7.78039e-303	0.429973	-0.469458
MFGE8	ITGAV	Epithelial	Fibroblast	0	1.66879e-78	0.429973	0.505525
MFGE8	ITGAV	Epithelial	Endothelial	0	0.000369087	0.429973	0.298994
MFGE8	ITGAV	Epithelial	Pericytes	0	6.6043e-67	0.429973	0.939974
MFGE8	ITGAV	Epithelial	Cycling	0	1.4896e-29	0.429973	-0.321895
MFGE8	ITGB3	Epithelial	Epithelial	0	2.0559e-09	0.429973	0.00834496
MFGE8	ITGB3	Epithelial	Fibroblast	0	1.77126e-17	0.429973	-0.198842
MFGE8	ITGB3	Epithelial	Endothelial	0	0.00462729	0.429973	0.0993298
MFGE8	ITGB3	Epithelial	Pericytes	0	2.02529e-07	0.429973	0.136001
MFGE8	PDGFRB	Epithelial	Pericytes	0	0.00290839	0.429973	0.229923
PLA2G10	PLA2R1	Epithelial	Epithelial	0	2.29925e-261	0.61552	0.31124
PLA2G10	PLA2R1	Epithelial	Fibroblast	0	3.71627e-43	0.61552	0.24755
PLA2G10	PLA2R1	Epithelial	Cycling	0	0.00238612	0.61552	0.0418436
RBP4	STRA6	Epithelial	Epithelial	0	9.62205e-98	-0.524396	0.0995628
RBP4	STRA6	Epithelial	Fibroblast	0	3.32447e-106	-0.524396	0.525656
RNASE2	TLR2	Macrophage	Epithelial	0	7.02129e-48	-0.8351	-0.0272731
RNASE2	TLR2	Macrophage	Acinar	0	1.20708e-69	-0.8351	1.3497
RNASE2	TLR2	Macrophage	Macrophage	0	7.34482e-104	-0.8351	-0.115173
RNASE2	TLR2	Macrophage	Mast	0	0.000377025	-0.8351	-0.280745
RNASE2	TLR2	Macrophage	Cycling	0	3.45975e-23	-0.8351	-0.258518
SEMA6A	PLXNA2	Epithelial	Epithelial	0	1.16729e-87	-0.475955	0.266771
SEMA6A	PLXNA2	Epithelial	CD8	0	0.000130811	-0.475955	-0.0436552
SEMA6A	PLXNA2	Epithelial	Acinar	0	3.03182e-114	-0.475955	-0.578723
SEMA6A	PLXNA4	Epithelial	Epithelial	0	1.4818e-30	-0.475955	0.0249807
SEMA6A	PLXNA4	Epithelial	Fibroblast	0	6.98024e-46	-0.475955	-0.392593
SLIT3	ROBO2	Epithelial	Fibroblast	0	1.23642e-47	-0.212389	0.202574
SLIT3	ROBO2	Epithelial	Pericytes	0	7.19872e-12	-0.212389	0.0946752
SPINK1	EGFR	Granulocyte	Epithelial	0	3.83547e-75	-5.71195	-0.022278
SPINK1	EGFR	Granulocyte	Granulocyte	0	7.46215e-15	-5.71195	-0.150645
SPINK1	EGFR	Granulocyte	Acinar	0	2.41989e-55	-5.71195	-0.112528
SPINK1	EGFR	Granulocyte	Macrophage	0	1.03082e-16	-5.71195	-0.0150589
SPINK1	EGFR	Granulocyte	Fibroblast	0	1.29059e-185	-5.71195	-1.24907
SPINK1	EGFR	Granulocyte	Pericytes	0	1.34765e-05	-5.71195	-0.210215
SPINK1	EGFR	Acinar	Epithelial	0	3.83547e-75	-2.36325	-0.022278
SPINK1	EGFR	Acinar	Granulocyte	0	7.46215e-15	-2.36325	-0.150645
SPINK1	EGFR	Acinar	Acinar	0	2.41989e-55	-2.36325	-0.112528
SPINK1	EGFR	Acinar	Macrophage	0	1.03082e-16	-2.36325	-0.0150589
SPINK1	EGFR	Acinar	Fibroblast	0	1.29059e-185	-2.36325	-1.24907
SPINK1	EGFR	Acinar	Pericytes	0	1.34765e-05	-2.36325	-0.210215
TCTN1	TMEM67	Epithelial	Epithelial	0	6.82936e-21	-0.321261	-0.0360033
TCTN1	TMEM67	Epithelial	Acinar	0	1.13245e-09	-0.321261	-0.0624739
TCTN1	TMEM67	Epithelial	Fibroblast	0	5.56028e-06	-0.321261	0.0461124
TIMP1	CD63	Epithelial	CD8	0	8.75958e-24	1.3681	-0.521241
TIMP1	CD63	Epithelial	CD4	0	4.62058e-07	1.3681	-0.238316
TIMP1	CD63	Epithelial	Granulocyte	0	5.82093e-20	1.3681	-0.413563
TIMP1	CD63	Epithelial	Acinar	0	7.06205e-105	1.3681	0.310431
TIMP1	CD63	Epithelial	Macrophage	0	4.61078e-41	1.3681	-0.177087
TIMP1	CD63	Epithelial	Fibroblast	0	6.68587e-34	1.3681	0.313266
TIMP1	CD63	Epithelial	B-Cells	0	8.87028e-10	1.3681	-0.20056
TIMP1	CD63	Epithelial	Mast	0	5.3035e-16	1.3681	0.655694
TIMP1	CD63	Epithelial	Cycling	0	1.66484e-11	1.3681	-0.241596
VIM	CD44	Epithelial	Epithelial	0	5.21275e-124	-0.251085	-0.169094
VIM	CD44	Epithelial	CD8	0	1.74454e-19	-0.251085	0.512652
VIM	CD44	Epithelial	CD4	0	1.30883e-18	-0.251085	0.511945
VIM	CD44	Epithelial	Acinar	0	1.6862e-41	-0.251085	0.663397
VIM	CD44	Epithelial	Macrophage	0	1.2466e-64	-0.251085	0.786408
VIM	CD44	Epithelial	Fibroblast	0	4.87529e-23	-0.251085	-0.734852
VIM	CD44	Epithelial	Pericytes	0	3.40416e-13	-0.251085	0.406512
VIM	CD44	Epithelial	Mast	0	1.43683e-15	-0.251085	0.858086
VIM	CD44	Epithelial	Cycling	0	0.0208429	-0.251085	0.0151378
ZG16B	CXCR4	Epithelial	Epithelial	0	0.000121241	1.35675	0.202302
ZG16B	CXCR4	Epithelial	CD8	0	2.90307e-57	1.35675	0.825534
ZG16B	CXCR4	Epithelial	CD4	0	2.08823e-55	1.35675	0.980764
ZG16B	CXCR4	Epithelial	Acinar	0	0	1.35675	2.86465
ZG16B	CXCR4	Epithelial	Macrophage	0	2.57198e-12	1.35675	0.624931
ZG16B	CXCR4	Epithelial	Fibroblast	0	0.0147191	1.35675	-0.160083
ZG16B	CXCR4	Epithelial	B-Cells	0	3.36631e-67	1.35675	0.938636
ZG16B	CXCR4	Epithelial	Mast	0	5.72597e-27	1.35675	-2.12022
ZG16B	CXCR4	Epithelial	Plasma	0	4.77979e-88	1.35675	-0.755055
ZG16B	TLR2	Epithelial	Epithelial	0	7.02129e-48	1.35675	-0.0272731
ZG16B	TLR2	Epithelial	Acinar	0	1.20708e-69	1.35675	1.3497
ZG16B	TLR2	Epithelial	Macrophage	0	7.34482e-104	1.35675	-0.115173
ZG16B	TLR2	Epithelial	Mast	0	0.000377025	1.35675	-0.280745
ZG16B	TLR2	Epithelial	Cycling	0	3.45975e-23	1.35675	-0.258518
ZG16B	TLR4	Epithelial	Granulocyte	0	0.00417505	1.35675	0.72476
ZG16B	TLR4	Epithelial	Acinar	0	1.42742e-113	1.35675	1.12057
ZG16B	TLR4	Epithelial	Macrophage	0	4.97464e-27	1.35675	0.0358438
ZG16B	TLR4	Epithelial	Endothelial	0	5.17153e-14	1.35675	-0.636187
ZG16B	TLR4	Epithelial	Pericytes	0	1.29352e-41	1.35675	-0.456679
ZG16B	TLR4	Epithelial	Cycling	0	0.00280904	1.35675	-0.124166
ZG16B	TLR5	Epithelial	Epithelial	0	6.07796e-39	1.35675	-0.0322471
ZG16B	TLR5	Epithelial	CD4	0	3.72202e-09	1.35675	-0.0474072
ZG16B	TLR5	Epithelial	Macrophage	0	3.71712e-30	1.35675	-0.0322801
ZG16B	TLR5	Epithelial	Fibroblast	0	0.00970706	1.35675	0.0362496
ZG16B	TLR5	Epithelial	Endothelial	0	7.04794e-13	1.35675	0.0288411
ZG16B	TLR5	Epithelial	Pericytes	0	0.0105819	1.35675	0.0583985
ZG16B	TLR6	Epithelial	Acinar	0	4.17125e-165	1.35675	1.46926
ZG16B	TLR6	Epithelial	Macrophage	0	4.05019e-61	1.35675	-0.0998827
ZG16B	TLR6	Epithelial	Cycling	0	1.48327e-06	1.35675	-0.0864549
FGL1	EGFR	Epithelial	Epithelial	8.2597e-303	3.83547e-75	-0.535935	-0.022278
FGL1	EGFR	Epithelial	Granulocyte	8.2597e-303	7.46215e-15	-0.535935	-0.150645
FGL1	EGFR	Epithelial	Acinar	8.2597e-303	2.41989e-55	-0.535935	-0.112528
FGL1	EGFR	Epithelial	Macrophage	8.2597e-303	1.03082e-16	-0.535935	-0.0150589
FGL1	EGFR	Epithelial	Fibroblast	8.2597e-303	1.29059e-185	-0.535935	-1.24907
FGL1	EGFR	Epithelial	Pericytes	8.2597e-303	1.34765e-05	-0.535935	-0.210215
CNTN4	PTPRG	Epithelial	Epithelial	2.6388e-302	8.05244e-126	-0.134644	-0.140672
CNTN4	PTPRG	Epithelial	Granulocyte	2.6388e-302	0.0115258	-0.134644	-0.130818
CNTN4	PTPRG	Epithelial	Acinar	2.6388e-302	0.000488913	-0.134644	0.0696912
CNTN4	PTPRG	Epithelial	Fibroblast	2.6388e-302	1.76834e-51	-0.134644	-0.66062
CNTN4	PTPRG	Epithelial	Endothelial	2.6388e-302	1.03397e-06	-0.134644	0.447442
ANGPT1	TEK	Epithelial	Pericytes	6.52949e-302	1.16594e-35	-0.194947	-0.297832
ANGPT1	TIE1	Epithelial	Endothelial	6.52949e-302	6.92162e-12	-0.194947	0.480023
ANGPT1	TIE1	Epithelial	Pericytes	6.52949e-302	1.28921e-43	-0.194947	-0.519805
ANGPT1	ITGA5	Epithelial	Epithelial	6.52949e-302	0	-0.194947	-0.162179
ANGPT1	ITGA5	Epithelial	Acinar	6.52949e-302	6.25867e-13	-0.194947	0.858009
ANGPT1	ITGA5	Epithelial	Macrophage	6.52949e-302	6.97981e-79	-0.194947	-0.126124
ANGPT1	ITGA5	Epithelial	Endothelial	6.52949e-302	2.3746e-48	-0.194947	1.06539
ANGPT1	ITGA5	Epithelial	Cycling	6.52949e-302	1.27181e-24	-0.194947	-0.228415
EDIL3	ITGAV	Fibroblast	Epithelial	6.11182e-300	5.12409e-210	1.22931	-0.210961
EDIL3	ITGAV	Fibroblast	CD8	6.11182e-300	6.67778e-18	1.22931	-0.122785
EDIL3	ITGAV	Fibroblast	Granulocyte	6.11182e-300	2.38354e-30	1.22931	-0.402545
EDIL3	ITGAV	Fibroblast	Acinar	6.11182e-300	1.93424e-18	1.22931	0.175201
EDIL3	ITGAV	Fibroblast	Macrophage	6.11182e-300	7.78039e-303	1.22931	-0.469458
EDIL3	ITGAV	Fibroblast	Fibroblast	6.11182e-300	1.66879e-78	1.22931	0.505525
EDIL3	ITGAV	Fibroblast	Endothelial	6.11182e-300	0.000369087	1.22931	0.298994
EDIL3	ITGAV	Fibroblast	Pericytes	6.11182e-300	6.6043e-67	1.22931	0.939974
EDIL3	ITGAV	Fibroblast	Cycling	6.11182e-300	1.4896e-29	1.22931	-0.321895
AFDN	EPHB2	Epithelial	Epithelial	2.38113e-296	3.83302e-65	-0.387217	-0.0743228
AFDN	EPHB2	Epithelial	Granulocyte	2.38113e-296	1.03512e-08	-0.387217	-0.177298
AFDN	EPHB2	Epithelial	Acinar	2.38113e-296	0.00278655	-0.387217	-0.019966
AFDN	EPHB2	Epithelial	Macrophage	2.38113e-296	5.58246e-66	-0.387217	-0.122817
AFDN	EPHB2	Epithelial	Fibroblast	2.38113e-296	2.64753e-15	-0.387217	0.04912
AFDN	EPHB2	Epithelial	Cycling	2.38113e-296	3.11038e-05	-0.387217	-0.0789522
AFDN	EPHB3	Epithelial	Epithelial	2.38113e-296	0.000561038	-0.387217	0.0904461
AFDN	EPHB3	Epithelial	Granulocyte	2.38113e-296	0.0162562	-0.387217	-0.0691708
AFDN	EPHB3	Epithelial	Acinar	2.38113e-296	2.64466e-27	-0.387217	-0.057925
AFDN	EPHB6	Epithelial	Epithelial	2.38113e-296	0	-0.387217	-0.953099
AFDN	EPHB6	Epithelial	Acinar	2.38113e-296	5.65861e-12	-0.387217	0.198451
AFDN	EPHB6	Epithelial	Macrophage	2.38113e-296	1.80225e-32	-0.387217	-0.0673491
AFDN	EPHB6	Epithelial	Pericytes	2.38113e-296	2.87322e-20	-0.387217	-0.729452
AFDN	EPHB6	Epithelial	Cycling	2.38113e-296	6.422e-30	-0.387217	-0.351755
AFDN	F11R	Epithelial	Epithelial	2.38113e-296	5.38788e-264	-0.387217	0.940806
AFDN	F11R	Epithelial	CD8	2.38113e-296	2.05312e-09	-0.387217	-0.117454
AFDN	F11R	Epithelial	CD4	2.38113e-296	8.47329e-12	-0.387217	-0.0723098
AFDN	F11R	Epithelial	Acinar	2.38113e-296	1.44685e-30	-0.387217	0.814722
AFDN	F11R	Epithelial	Macrophage	2.38113e-296	5.22098e-26	-0.387217	-0.0148011
AFDN	F11R	Epithelial	Fibroblast	2.38113e-296	1.22606e-05	-0.387217	-0.0574271
AFDN	F11R	Epithelial	Endothelial	2.38113e-296	1.79752e-06	-0.387217	0.289725
AFDN	F11R	Epithelial	B-Cells	2.38113e-296	6.1145e-08	-0.387217	-0.147523
AFDN	F11R	Epithelial	Pericytes	2.38113e-296	1.0648e-24	-0.387217	-0.141705
AFDN	F11R	Epithelial	Cycling	2.38113e-296	0.00427459	-0.387217	0.127927
AFDN	F11R	Epithelial	Plasma	2.38113e-296	1.17544e-32	-0.387217	-0.0945984
AFDN	F11R	Epithelial	NK	2.38113e-296	0.00218575	-0.387217	-0.413342
AFDN	NRXN2	Epithelial	Pericytes	2.38113e-296	2.10473e-09	-0.387217	0.106061
AFDN	NRXN3	Epithelial	Epithelial	2.38113e-296	2.00904e-159	-0.387217	-0.0680182
AFDN	NRXN3	Epithelial	Acinar	2.38113e-296	0.000241811	-0.387217	-0.0277852
AFDN	NRXN3	Epithelial	Fibroblast	2.38113e-296	2.50087e-13	-0.387217	0.0381179
AFDN	NRXN3	Epithelial	Pericytes	2.38113e-296	1.39616e-08	-0.387217	0.0533291
AFDN	NECTIN1	Epithelial	Epithelial	2.38113e-296	0.000520391	-0.387217	0.113042
AFDN	NECTIN1	Epithelial	Acinar	2.38113e-296	2.56758e-36	-0.387217	-0.0512923
AFDN	NECTIN1	Epithelial	Endothelial	2.38113e-296	0.0101264	-0.387217	0.0406438
AFDN	NECTIN2	Epithelial	Epithelial	2.38113e-296	1.20129e-14	-0.387217	0.0835645
AFDN	NECTIN2	Epithelial	Granulocyte	2.38113e-296	3.65861e-12	-0.387217	-0.247538
AFDN	NECTIN2	Epithelial	Acinar	2.38113e-296	9.67529e-16	-0.387217	0.0613375
AFDN	NECTIN2	Epithelial	Macrophage	2.38113e-296	7.08513e-17	-0.387217	0.173394
AFDN	NECTIN2	Epithelial	Fibroblast	2.38113e-296	7.85271e-51	-0.387217	0.309877
AFDN	NECTIN3	Epithelial	Epithelial	2.38113e-296	7.16754e-06	-0.387217	0.219618
AFDN	NECTIN3	Epithelial	Acinar	2.38113e-296	9.7481e-19	-0.387217	0.113804
AFDN	NECTIN4	Epithelial	Epithelial	2.38113e-296	0	-0.387217	0.683925
MMP2	SDC2	Endothelial	Epithelial	2.46416e-296	0	1.98714	-0.579712
MMP2	SDC2	Endothelial	Granulocyte	2.46416e-296	1.267e-21	1.98714	-0.348546
MMP2	SDC2	Endothelial	Acinar	2.46416e-296	2.15164e-127	1.98714	-0.204166
MMP2	SDC2	Endothelial	Pericytes	2.46416e-296	1.11445e-86	1.98714	1.10568
MMP2	SDC2	Endothelial	Cycling	2.46416e-296	1.71993e-53	1.98714	-0.281254
F12	CD93	Epithelial	CD8	8.90344e-289	6.91724e-06	0.372089	-0.0438169
F12	CD93	Epithelial	Acinar	8.90344e-289	1.22953e-60	0.372089	1.00255
F12	CD93	Epithelial	Macrophage	8.90344e-289	3.55082e-135	0.372089	-0.246845
F12	CD93	Epithelial	Endothelial	8.90344e-289	1.89637e-43	0.372089	1.01974
F12	CD93	Epithelial	Pericytes	8.90344e-289	6.63421e-47	0.372089	-0.847037
F12	CD93	Epithelial	Cycling	8.90344e-289	5.09373e-23	0.372089	-0.432069
F12	CD93	Epithelial	NK	8.90344e-289	1.8931e-05	0.372089	-0.167809
F12	GP1BA	Epithelial	Epithelial	8.90344e-289	5.34776e-06	0.372089	-0.00818038
GNAS	ADORA1	Epithelial	Epithelial	6.52179e-288	0	-0.38708	-0.457403
GNAS	ADORA1	Epithelial	Granulocyte	6.52179e-288	0.00576519	-0.38708	-0.0605156
GNAS	ADORA1	Epithelial	Acinar	6.52179e-288	2.64497e-10	-0.38708	-0.00823767
GNAS	ADORA1	Epithelial	Cycling	6.52179e-288	1.92676e-26	-0.38708	-0.168884
GNAS	ADORA1	Epithelial	Plasma	6.52179e-288	0.00126413	-0.38708	-0.0102219
GNAS	ADRB3	Epithelial	Macrophage	6.52179e-288	8.30345e-34	-0.38708	0.0393
GNAS	AVPR2	Epithelial	Epithelial	6.52179e-288	5.16851e-44	-0.38708	0.0268129
GNAS	AVPR2	Epithelial	Granulocyte	6.52179e-288	0.0162562	-0.38708	-0.0522334
GNAS	AVPR2	Epithelial	Pericytes	6.52179e-288	6.37563e-13	-0.38708	-0.0654798
GNAS	PTGIR	Epithelial	Pericytes	6.52179e-288	7.37674e-15	-0.38708	0.281721
GNAS	VIPR1	Epithelial	Epithelial	6.52179e-288	7.61737e-17	-0.38708	0.0667765
GNAS	VIPR1	Epithelial	Macrophage	6.52179e-288	0.0261965	-0.38708	0.00934667
GNAS	VIPR1	Epithelial	Pericytes	6.52179e-288	7.11029e-51	-0.38708	-0.353601
TNFSF9	TNFRSF9	Epithelial	CD4	5.11367e-287	9.05192e-15	0.360338	0.384683
TNFSF9	TNFRSF9	Epithelial	Macrophage	5.11367e-287	6.47598e-16	0.360338	0.0472314
TNFSF9	TNFRSF9	Epithelial	Fibroblast	5.11367e-287	0.0437428	0.360338	0.0071107
TNFSF9	TRAF2	Epithelial	Fibroblast	5.11367e-287	1.63493e-15	0.360338	0.0450586
PTMA	VIPR1	Epithelial	Epithelial	2.17298e-285	7.61737e-17	0.587212	0.0667765
PTMA	VIPR1	Epithelial	Macrophage	2.17298e-285	0.0261965	0.587212	0.00934667
PTMA	VIPR1	Epithelial	Pericytes	2.17298e-285	7.11029e-51	0.587212	-0.353601
COL5A1	SDC3	Fibroblast	Epithelial	1.34379e-280	2.16541e-29	1.90907	0.00540831
COL5A1	SDC3	Fibroblast	Granulocyte	1.34379e-280	6.84909e-06	1.90907	-0.0686996
COL5A1	SDC3	Fibroblast	Acinar	1.34379e-280	0.00011228	1.90907	0.066749
COL5A1	SDC3	Fibroblast	Macrophage	1.34379e-280	2.20253e-13	1.90907	0.125312
COL5A1	SDC3	Fibroblast	Pericytes	1.34379e-280	2.08564e-24	1.90907	-0.195225
MDK	PTPRZ1	Epithelial	Acinar	4.59796e-280	1.24928e-08	1.38829	-0.0181141
MDK	LRP1	Epithelial	Epithelial	4.59796e-280	1.99124e-148	1.38829	0.475578
MDK	LRP1	Epithelial	CD8	4.59796e-280	4.54939e-09	1.38829	-0.0610558
MDK	LRP1	Epithelial	Granulocyte	4.59796e-280	1.48994e-08	1.38829	-0.276267
MDK	LRP1	Epithelial	Macrophage	4.59796e-280	0	1.38829	-0.548958
MDK	LRP1	Epithelial	Fibroblast	4.59796e-280	7.27225e-24	1.38829	-0.488639
MDK	LRP1	Epithelial	Cycling	4.59796e-280	4.47323e-09	1.38829	-0.412677
MDK	LRP1	Epithelial	NK	4.59796e-280	0.0411012	1.38829	-0.0933615
MDK	SDC1	Epithelial	Epithelial	4.59796e-280	4.00362e-154	1.38829	0.949572
MDK	SDC1	Epithelial	Fibroblast	4.59796e-280	3.03355e-141	1.38829	0.936202
MDK	SDC3	Epithelial	Epithelial	4.59796e-280	2.16541e-29	1.38829	0.00540831
MDK	SDC3	Epithelial	Granulocyte	4.59796e-280	6.84909e-06	1.38829	-0.0686996
MDK	SDC3	Epithelial	Acinar	4.59796e-280	0.00011228	1.38829	0.066749
MDK	SDC3	Epithelial	Macrophage	4.59796e-280	2.20253e-13	1.38829	0.125312
MDK	SDC3	Epithelial	Pericytes	4.59796e-280	2.08564e-24	1.38829	-0.195225
MDK	SDC4	Epithelial	Epithelial	4.59796e-280	4.69037e-17	1.38829	0.509224
MDK	SDC4	Epithelial	Granulocyte	4.59796e-280	4.01801e-08	1.38829	-0.188799
MDK	SDC4	Epithelial	Acinar	4.59796e-280	3.48401e-46	1.38829	0.244596
MDK	SDC4	Epithelial	Macrophage	4.59796e-280	1.34193e-27	1.38829	0.213748
MDK	SDC4	Epithelial	Fibroblast	4.59796e-280	3.79815e-143	1.38829	-0.693862
MDK	SDC4	Epithelial	NK	4.59796e-280	5.86284e-10	1.38829	-0.256696
MDK	TSPAN1	Epithelial	Epithelial	4.59796e-280	0	1.38829	2.00212
MDK	TSPAN1	Epithelial	Acinar	4.59796e-280	6.45036e-22	1.38829	0.377985
MDK	TSPAN1	Epithelial	Cycling	4.59796e-280	8.75226e-18	1.38829	0.701756
MDK	TSPAN1	Epithelial	Plasma	4.59796e-280	3.13009e-18	1.38829	-0.030116
PSAP	GPR37	Epithelial	Epithelial	2.58707e-275	0	-0.387336	-0.216016
PSAP	GPR37	Epithelial	Acinar	2.58707e-275	0.00621977	-0.387336	-0.0105446
PSAP	GPR37L1	Epithelial	Epithelial	2.58707e-275	1.13454e-27	-0.387336	0.0262008
PSAP	LRP1	Epithelial	Epithelial	2.58707e-275	1.99124e-148	-0.387336	0.475578
PSAP	LRP1	Epithelial	CD8	2.58707e-275	4.54939e-09	-0.387336	-0.0610558
PSAP	LRP1	Epithelial	Granulocyte	2.58707e-275	1.48994e-08	-0.387336	-0.276267
PSAP	LRP1	Epithelial	Macrophage	2.58707e-275	0	-0.387336	-0.548958
PSAP	LRP1	Epithelial	Fibroblast	2.58707e-275	7.27225e-24	-0.387336	-0.488639
PSAP	LRP1	Epithelial	Cycling	2.58707e-275	4.47323e-09	-0.387336	-0.412677
PSAP	LRP1	Epithelial	NK	2.58707e-275	0.0411012	-0.387336	-0.0933615
PSAP	CD1B	Epithelial	Macrophage	2.58707e-275	2.63666e-19	-0.387336	0.0919284
PSAP	CELSR1	Epithelial	Epithelial	2.58707e-275	6.53182e-171	-0.387336	0.160721
PSAP	CELSR1	Epithelial	Fibroblast	2.58707e-275	5.43916e-16	-0.387336	0.0410534
PSAP	CELSR1	Epithelial	Endothelial	2.58707e-275	8.56284e-20	-0.387336	0.112698
PSAP	CELSR1	Epithelial	Plasma	2.58707e-275	0.000329039	-0.387336	-0.0161808
CD24	SELP	Acinar	Endothelial	2.32114e-274	9.67689e-29	-1.06518	1.05612
COL11A1	DDR1	Fibroblast	Epithelial	7.97214e-267	1.93137e-37	2.38756	0.0944046
COL11A1	DDR1	Fibroblast	Granulocyte	7.97214e-267	4.91559e-24	2.38756	-0.24638
COL11A1	DDR1	Fibroblast	Acinar	7.97214e-267	4.56989e-53	2.38756	-0.0504608
COL11A1	DDR1	Fibroblast	Pericytes	7.97214e-267	0.00484717	2.38756	0.0631909
COL11A1	DDR1	Fibroblast	Cycling	7.97214e-267	0.000284406	2.38756	-0.0746372
AZGP1	ITGAV	Acinar	Epithelial	1.2883e-266	5.12409e-210	-0.991205	-0.210961
AZGP1	ITGAV	Acinar	CD8	1.2883e-266	6.67778e-18	-0.991205	-0.122785
AZGP1	ITGAV	Acinar	Granulocyte	1.2883e-266	2.38354e-30	-0.991205	-0.402545
AZGP1	ITGAV	Acinar	Acinar	1.2883e-266	1.93424e-18	-0.991205	0.175201
AZGP1	ITGAV	Acinar	Macrophage	1.2883e-266	7.78039e-303	-0.991205	-0.469458
AZGP1	ITGAV	Acinar	Fibroblast	1.2883e-266	1.66879e-78	-0.991205	0.505525
AZGP1	ITGAV	Acinar	Endothelial	1.2883e-266	0.000369087	-0.991205	0.298994
AZGP1	ITGAV	Acinar	Pericytes	1.2883e-266	6.6043e-67	-0.991205	0.939974
AZGP1	ITGAV	Acinar	Cycling	1.2883e-266	1.4896e-29	-0.991205	-0.321895
BGN	TLR2	Fibroblast	Epithelial	1.98018e-265	7.02129e-48	1.50226	-0.0272731
BGN	TLR2	Fibroblast	Acinar	1.98018e-265	1.20708e-69	1.50226	1.3497
BGN	TLR2	Fibroblast	Macrophage	1.98018e-265	7.34482e-104	1.50226	-0.115173
BGN	TLR2	Fibroblast	Mast	1.98018e-265	0.000377025	1.50226	-0.280745
BGN	TLR2	Fibroblast	Cycling	1.98018e-265	3.45975e-23	1.50226	-0.258518
BGN	TLR4	Fibroblast	Granulocyte	1.98018e-265	0.00417505	1.50226	0.72476
BGN	TLR4	Fibroblast	Acinar	1.98018e-265	1.42742e-113	1.50226	1.12057
BGN	TLR4	Fibroblast	Macrophage	1.98018e-265	4.97464e-27	1.50226	0.0358438
BGN	TLR4	Fibroblast	Endothelial	1.98018e-265	5.17153e-14	1.50226	-0.636187
BGN	TLR4	Fibroblast	Pericytes	1.98018e-265	1.29352e-41	1.50226	-0.456679
BGN	TLR4	Fibroblast	Cycling	1.98018e-265	0.00280904	1.50226	-0.124166
CCN3	NOTCH1	Epithelial	Epithelial	6.77047e-264	9.96063e-149	-0.299122	-0.0828877
CCN3	NOTCH1	Epithelial	CD8	6.77047e-264	0.0357353	-0.299122	-0.0577529
CCN3	NOTCH1	Epithelial	CD4	6.77047e-264	1.3004e-36	-0.299122	-0.263532
CCN3	NOTCH1	Epithelial	Granulocyte	6.77047e-264	4.54554e-05	-0.299122	0.947762
CCN3	NOTCH1	Epithelial	Acinar	6.77047e-264	2.21114e-11	-0.299122	0.746129
CCN3	NOTCH1	Epithelial	Macrophage	6.77047e-264	2.46925e-70	-0.299122	-0.0610823
CCN3	NOTCH1	Epithelial	Fibroblast	6.77047e-264	5.47659e-12	-0.299122	0.0277843
CCN3	NOTCH1	Epithelial	Endothelial	6.77047e-264	9.36199e-07	-0.299122	0.427386
CCN3	NOTCH1	Epithelial	Mast	6.77047e-264	0.00381516	-0.299122	-0.229101
CCN3	NOTCH1	Epithelial	Cycling	6.77047e-264	5.96219e-10	-0.299122	-0.0978686
FN1	ITGA2	Fibroblast	Epithelial	4.47255e-262	0	2.77659	1.51184
FN1	ITGA2	Fibroblast	CD8	4.47255e-262	0.001315	2.77659	-0.0424823
FN1	ITGA2	Fibroblast	Granulocyte	4.47255e-262	1.26442e-05	2.77659	-0.105921
FN1	ITGA2	Fibroblast	Fibroblast	4.47255e-262	1.09254e-49	2.77659	0.292511
FN1	ITGA2	Fibroblast	Endothelial	4.47255e-262	2.74857e-49	2.77659	0.623198
FN1	ITGA4	Fibroblast	Epithelial	4.47255e-262	0.000411333	2.77659	0.0071396
FN1	ITGA4	Fibroblast	CD8	4.47255e-262	0.013142	2.77659	0.29551
FN1	ITGA4	Fibroblast	CD4	4.47255e-262	1.9479e-10	2.77659	0.560218
FN1	ITGA4	Fibroblast	Acinar	4.47255e-262	1.52282e-10	2.77659	0.360247
FN1	ITGA4	Fibroblast	Macrophage	4.47255e-262	1.27267e-156	2.77659	-0.0212363
FN1	ITGA4	Fibroblast	Fibroblast	4.47255e-262	8.52213e-08	2.77659	0.047186
FN1	ITGA4	Fibroblast	Plasma	4.47255e-262	6.69632e-17	2.77659	-0.0366525
FN1	ITGA5	Fibroblast	Epithelial	4.47255e-262	0	2.77659	-0.162179
FN1	ITGA5	Fibroblast	Acinar	4.47255e-262	6.25867e-13	2.77659	0.858009
FN1	ITGA5	Fibroblast	Macrophage	4.47255e-262	6.97981e-79	2.77659	-0.126124
FN1	ITGA5	Fibroblast	Endothelial	4.47255e-262	2.3746e-48	2.77659	1.06539
FN1	ITGA5	Fibroblast	Cycling	4.47255e-262	1.27181e-24	2.77659	-0.228415
FN1	ITGA8	Fibroblast	Endothelial	4.47255e-262	3.18853e-17	2.77659	0.245304
FN1	ITGB1	Fibroblast	Epithelial	4.47255e-262	3.15875e-54	2.77659	0.552297
FN1	ITGB1	Fibroblast	CD8	4.47255e-262	0.0132055	2.77659	0.541011
FN1	ITGB1	Fibroblast	CD4	4.47255e-262	7.66525e-49	2.77659	1.08703
FN1	ITGB1	Fibroblast	Granulocyte	4.47255e-262	5.21787e-89	2.77659	-0.981028
FN1	ITGB1	Fibroblast	Acinar	4.47255e-262	3.99966e-73	2.77659	0.307803
FN1	ITGB1	Fibroblast	Macrophage	4.47255e-262	7.4765e-110	2.77659	-0.207552
FN1	ITGB1	Fibroblast	Fibroblast	4.47255e-262	1.11144e-100	2.77659	0.724058
FN1	ITGB1	Fibroblast	Endothelial	4.47255e-262	6.8745e-22	2.77659	0.822529
FN1	ITGB1	Fibroblast	B-Cells	4.47255e-262	9.4663e-17	2.77659	-0.118561
FN1	ITGB1	Fibroblast	Pericytes	4.47255e-262	3.10722e-21	2.77659	0.360213
FN1	ITGB3	Fibroblast	Epithelial	4.47255e-262	2.0559e-09	2.77659	0.00834496
FN1	ITGB3	Fibroblast	Fibroblast	4.47255e-262	1.77126e-17	2.77659	-0.198842
FN1	ITGB3	Fibroblast	Endothelial	4.47255e-262	0.00462729	2.77659	0.0993298
FN1	ITGB3	Fibroblast	Pericytes	4.47255e-262	2.02529e-07	2.77659	0.136001
FN1	ITGB6	Fibroblast	Epithelial	4.47255e-262	2.47404e-239	2.77659	1.40563
FN1	ITGB6	Fibroblast	Cycling	4.47255e-262	0.0281678	2.77659	0.515915
FN1	SDC2	Fibroblast	Epithelial	4.47255e-262	0	2.77659	-0.579712
FN1	SDC2	Fibroblast	Granulocyte	4.47255e-262	1.267e-21	2.77659	-0.348546
FN1	SDC2	Fibroblast	Acinar	4.47255e-262	2.15164e-127	2.77659	-0.204166
FN1	SDC2	Fibroblast	Pericytes	4.47255e-262	1.11445e-86	2.77659	1.10568
FN1	SDC2	Fibroblast	Cycling	4.47255e-262	1.71993e-53	2.77659	-0.281254
FN1	CD44	Fibroblast	Epithelial	4.47255e-262	5.21275e-124	2.77659	-0.169094
FN1	CD44	Fibroblast	CD8	4.47255e-262	1.74454e-19	2.77659	0.512652
FN1	CD44	Fibroblast	CD4	4.47255e-262	1.30883e-18	2.77659	0.511945
FN1	CD44	Fibroblast	Acinar	4.47255e-262	1.6862e-41	2.77659	0.663397
FN1	CD44	Fibroblast	Macrophage	4.47255e-262	1.2466e-64	2.77659	0.786408
FN1	CD44	Fibroblast	Fibroblast	4.47255e-262	4.87529e-23	2.77659	-0.734852
FN1	CD44	Fibroblast	Pericytes	4.47255e-262	3.40416e-13	2.77659	0.406512
FN1	CD44	Fibroblast	Mast	4.47255e-262	1.43683e-15	2.77659	0.858086
FN1	CD44	Fibroblast	Cycling	4.47255e-262	0.0208429	2.77659	0.0151378
FN1	COL13A1	Fibroblast	Fibroblast	4.47255e-262	4.96716e-24	2.77659	0.0876046
FN1	COL13A1	Fibroblast	Endothelial	4.47255e-262	1.05516e-39	2.77659	0.489181
FN1	COL13A1	Fibroblast	Pericytes	4.47255e-262	0.00422208	2.77659	0.0854359
FN1	ITGA3	Fibroblast	Epithelial	4.47255e-262	7.99582e-229	2.77659	1.04959
FN1	ITGA3	Fibroblast	Granulocyte	4.47255e-262	6.44539e-18	2.77659	-0.112182
FN1	ITGA3	Fibroblast	Acinar	4.47255e-262	4.71169e-05	2.77659	0.349836
FN1	ITGA3	Fibroblast	Macrophage	4.47255e-262	0.000311281	2.77659	-0.00974927
FN1	ITGA3	Fibroblast	Endothelial	4.47255e-262	1.50054e-07	2.77659	0.169359
FN1	ITGA3	Fibroblast	Pericytes	4.47255e-262	0.00167954	2.77659	0.188583
FN1	ITGA3	Fibroblast	NK	4.47255e-262	0.000166277	2.77659	-0.0673099
FN1	ITGA9	Fibroblast	Macrophage	4.47255e-262	2.77903e-212	2.77659	-0.240045
FN1	ITGA9	Fibroblast	Fibroblast	4.47255e-262	4.79553e-20	2.77659	0.0746288
FN1	ITGA9	Fibroblast	Pericytes	4.47255e-262	4.52297e-12	2.77659	-0.0831755
FN1	ITGA9	Fibroblast	Cycling	4.47255e-262	8.24694e-10	2.77659	-0.0847481
FN1	ITGAV	Fibroblast	Epithelial	4.47255e-262	5.12409e-210	2.77659	-0.210961
FN1	ITGAV	Fibroblast	CD8	4.47255e-262	6.67778e-18	2.77659	-0.122785
FN1	ITGAV	Fibroblast	Granulocyte	4.47255e-262	2.38354e-30	2.77659	-0.402545
FN1	ITGAV	Fibroblast	Acinar	4.47255e-262	1.93424e-18	2.77659	0.175201
FN1	ITGAV	Fibroblast	Macrophage	4.47255e-262	7.78039e-303	2.77659	-0.469458
FN1	ITGAV	Fibroblast	Fibroblast	4.47255e-262	1.66879e-78	2.77659	0.505525
FN1	ITGAV	Fibroblast	Endothelial	4.47255e-262	0.000369087	2.77659	0.298994
FN1	ITGAV	Fibroblast	Pericytes	4.47255e-262	6.6043e-67	2.77659	0.939974
FN1	ITGAV	Fibroblast	Cycling	4.47255e-262	1.4896e-29	2.77659	-0.321895
FN1	ITGB7	Fibroblast	CD8	4.47255e-262	8.30012e-16	2.77659	0.4236
FN1	ITGB7	Fibroblast	CD4	4.47255e-262	6.87747e-20	2.77659	0.339348
FN1	ITGB7	Fibroblast	Macrophage	4.47255e-262	5.22074e-29	2.77659	0.210669
FN1	ITGB7	Fibroblast	Cycling	4.47255e-262	0.0449845	2.77659	0.426806
FN1	NT5E	Fibroblast	Epithelial	4.47255e-262	0	2.77659	0.490565
FN1	NT5E	Fibroblast	CD4	4.47255e-262	0.00060952	2.77659	-0.0315529
FN1	NT5E	Fibroblast	Acinar	4.47255e-262	2.92382e-15	2.77659	0.107356
FN1	NT5E	Fibroblast	Macrophage	4.47255e-262	3.44579e-23	2.77659	0.118601
FN1	NT5E	Fibroblast	Fibroblast	4.47255e-262	0.00268636	2.77659	-0.196416
FN1	NT5E	Fibroblast	Endothelial	4.47255e-262	3.69603e-19	2.77659	0.328078
FN1	NT5E	Fibroblast	Pericytes	4.47255e-262	2.87693e-14	2.77659	0.294298
FN1	NT5E	Fibroblast	Cycling	4.47255e-262	5.18794e-06	2.77659	0.251603
FN1	PLAUR	Fibroblast	Epithelial	4.47255e-262	0	2.77659	1.27925
FN1	PLAUR	Fibroblast	Granulocyte	4.47255e-262	1.02078e-25	2.77659	1.53765
FN1	PLAUR	Fibroblast	Acinar	4.47255e-262	3.13011e-233	2.77659	1.90858
FN1	PLAUR	Fibroblast	Fibroblast	4.47255e-262	2.80123e-05	2.77659	0.0900659
FN1	PLAUR	Fibroblast	Pericytes	4.47255e-262	4.50724e-07	2.77659	0.00454997
FN1	TMPRSS6	Fibroblast	Epithelial	4.47255e-262	2.2994e-10	2.77659	0.0111924
FN1	TNFRSF11B	Fibroblast	Epithelial	4.47255e-262	5.11409e-19	2.77659	0.351232
FN1	TNFRSF11B	Fibroblast	Fibroblast	4.47255e-262	0.00318907	2.77659	0.0650777
FN1	TNFRSF11B	Fibroblast	Endothelial	4.47255e-262	1.90637e-18	2.77659	0.18246
FN1	TNFRSF11B	Fibroblast	Pericytes	4.47255e-262	6.32699e-24	2.77659	0.280972
FN1	TNFRSF11B	Fibroblast	Plasma	4.47255e-262	0.00126413	2.77659	-0.0136624
SAA1	FPR2	Epithelial	Granulocyte	1.06107e-261	8.33166e-09	1.51806	1.18962
SAA1	FPR2	Epithelial	Acinar	1.06107e-261	1.09155e-76	1.51806	0.592288
SAA1	FPR1	Epithelial	Granulocyte	1.06107e-261	1.42339e-33	1.51806	1.2567
SAA1	FPR1	Epithelial	Acinar	1.06107e-261	2.12109e-175	1.51806	1.58954
SAA1	FPR1	Epithelial	Macrophage	1.06107e-261	6.10818e-99	1.51806	-0.0889884
SAA1	FPR1	Epithelial	Cycling	1.06107e-261	1.2531e-15	1.51806	-0.16558
WNT7A	FZD5	Epithelial	Epithelial	2.7633e-260	1.14509e-225	0.289208	-0.269513
WNT7A	FZD5	Epithelial	Granulocyte	2.7633e-260	1.16205e-11	0.289208	-0.167559
WNT7A	FZD5	Epithelial	Acinar	2.7633e-260	5.04932e-40	0.289208	0.012045
WNT7A	FZD5	Epithelial	Macrophage	2.7633e-260	3.81357e-68	0.289208	-0.0937041
WNT7A	FZD5	Epithelial	Pericytes	2.7633e-260	0.0328199	0.289208	0.0190372
WNT7A	FZD5	Epithelial	Cycling	2.7633e-260	2.08173e-05	0.289208	-0.0995368
WNT7A	FZD10	Epithelial	Fibroblast	2.7633e-260	5.75636e-09	0.289208	-0.0646817
WNT7A	FZD10	Epithelial	Pericytes	2.7633e-260	2.6951e-10	0.289208	0.098814
CXCL5	CXCR1	Epithelial	Granulocyte	1.58673e-254	9.29864e-26	1.34821	1.63613
CXCL5	CXCR1	Epithelial	Acinar	1.58673e-254	1.48924e-89	1.34821	0.608633
CXCL5	CXCR2	Epithelial	Granulocyte	1.58673e-254	2.84451e-59	1.34821	2.64226
CXCL5	CXCR2	Epithelial	Acinar	1.58673e-254	8.67029e-206	1.34821	1.30837
CXCL5	CXCR2	Epithelial	Macrophage	1.58673e-254	9.48033e-23	1.34821	0.0249365
CXCL5	ACKR1	Epithelial	Endothelial	1.58673e-254	1.10032e-10	1.34821	0.600822
CXCL5	ACKR1	Epithelial	Pericytes	1.58673e-254	0.00142579	1.34821	-0.728622
EDIL3	ITGAV	Endothelial	Epithelial	4.11606e-254	5.12409e-210	1.22031	-0.210961
EDIL3	ITGAV	Endothelial	CD8	4.11606e-254	6.67778e-18	1.22031	-0.122785
EDIL3	ITGAV	Endothelial	Granulocyte	4.11606e-254	2.38354e-30	1.22031	-0.402545
EDIL3	ITGAV	Endothelial	Acinar	4.11606e-254	1.93424e-18	1.22031	0.175201
EDIL3	ITGAV	Endothelial	Macrophage	4.11606e-254	7.78039e-303	1.22031	-0.469458
EDIL3	ITGAV	Endothelial	Fibroblast	4.11606e-254	1.66879e-78	1.22031	0.505525
EDIL3	ITGAV	Endothelial	Endothelial	4.11606e-254	0.000369087	1.22031	0.298994
EDIL3	ITGAV	Endothelial	Pericytes	4.11606e-254	6.6043e-67	1.22031	0.939974
EDIL3	ITGAV	Endothelial	Cycling	4.11606e-254	1.4896e-29	1.22031	-0.321895
DEFB1	CCR6	Granulocyte	Epithelial	1.41785e-251	8.95052e-05	-1.63777	0.0228123
DEFB1	CCR6	Granulocyte	CD4	1.41785e-251	1.355e-41	-1.63777	0.651017
DEFB1	CCR6	Granulocyte	Macrophage	1.41785e-251	5.05365e-77	-1.63777	0.186366
DEFB1	CCR6	Granulocyte	Cycling	1.41785e-251	5.47862e-06	-1.63777	0.165574
DEFB1	CCR6	Granulocyte	Plasma	1.41785e-251	2.80016e-07	-1.63777	-0.0329877
LAMB2	RPSA	Epithelial	Epithelial	2.2472e-250	4.15411e-252	-0.214536	-0.278222
LAMB2	RPSA	Epithelial	CD8	2.2472e-250	5.06606e-06	-0.214536	-0.121241
LAMB2	RPSA	Epithelial	CD4	2.2472e-250	0.0380072	-0.214536	0.145364
LAMB2	RPSA	Epithelial	Granulocyte	2.2472e-250	0	-0.214536	-2.19627
LAMB2	RPSA	Epithelial	Acinar	2.2472e-250	3.281e-80	-0.214536	0.00222543
LAMB2	RPSA	Epithelial	Macrophage	2.2472e-250	1.02676e-176	-0.214536	-0.311218
LAMB2	RPSA	Epithelial	Endothelial	2.2472e-250	0.000760865	-0.214536	-0.389389
LAMB2	RPSA	Epithelial	B-Cells	2.2472e-250	4.67477e-18	-0.214536	0.240096
LAMB2	RPSA	Epithelial	Mast	2.2472e-250	2.61453e-16	-0.214536	0.709798
LAMB2	RPSA	Epithelial	Plasma	2.2472e-250	0.00481459	-0.214536	-0.467208
SHH	BOC	Epithelial	Epithelial	2.54571e-250	3.95138e-23	0.226414	-0.00786122
SHH	BOC	Epithelial	Acinar	2.54571e-250	0.00044692	0.226414	-0.056247
SHH	BOC	Epithelial	Fibroblast	2.54571e-250	2.21308e-08	0.226414	-0.367896
SHH	BOC	Epithelial	Pericytes	2.54571e-250	0.00229797	0.226414	-0.0897832
SHH	CDON	Epithelial	Epithelial	2.54571e-250	2.51105e-18	0.226414	-0.0198904
SHH	CDON	Epithelial	Fibroblast	2.54571e-250	2.37629e-49	0.226414	-0.325703
SHH	HHIP	Epithelial	Epithelial	2.54571e-250	2.52749e-05	0.226414	0.00717071
SHH	HHIP	Epithelial	Fibroblast	2.54571e-250	2.62724e-101	0.226414	0.619829
SHH	PTCH1	Epithelial	Epithelial	2.54571e-250	1.6412e-101	0.226414	-0.0909541
SHH	PTCH1	Epithelial	Acinar	2.54571e-250	1.09984e-13	0.226414	0.023577
SHH	PTCH1	Epithelial	Fibroblast	2.54571e-250	2.22711e-36	0.226414	0.513104
SHH	PTCH1	Epithelial	Cycling	2.54571e-250	0.000935105	0.226414	-0.030396
SHH	SMO	Epithelial	Epithelial	2.54571e-250	1.39096e-232	0.226414	-0.0930234
SHH	SMO	Epithelial	Acinar	2.54571e-250	1.9695e-05	0.226414	0.0146762
SHH	SMO	Epithelial	Fibroblast	2.54571e-250	8.82611e-58	0.226414	0.144293
SHH	SMO	Epithelial	Cycling	2.54571e-250	2.01629e-05	0.226414	-0.0353871
SHH	PTCH2	Epithelial	Epithelial	2.54571e-250	6.03618e-172	0.226414	-0.0902558
SHH	PTCH2	Epithelial	Macrophage	2.54571e-250	9.3687e-33	0.226414	-0.090051
SHH	PTCH2	Epithelial	Fibroblast	2.54571e-250	0.000182414	0.226414	0.0546254
SHH	PTCH2	Epithelial	Cycling	2.54571e-250	0.000146064	0.226414	-0.0970169
NMU	NMUR1	Epithelial	Fibroblast	2.48175e-249	0.0118393	0.384499	0.0115516
NMU	NMUR2	Epithelial	Epithelial	2.48175e-249	7.3977e-22	0.384499	0.0304404
NID1	PTPRF	Fibroblast	Granulocyte	5.89863e-249	1.50939e-21	-2.45929	-0.239341
NID1	PTPRF	Fibroblast	Acinar	5.89863e-249	1.0676e-103	-2.45929	-0.0751773
NID1	PTPRF	Fibroblast	Fibroblast	5.89863e-249	1.50366e-28	-2.45929	0.183133
NID1	COL13A1	Fibroblast	Fibroblast	5.89863e-249	4.96716e-24	-2.45929	0.0876046
NID1	COL13A1	Fibroblast	Endothelial	5.89863e-249	1.05516e-39	-2.45929	0.489181
NID1	COL13A1	Fibroblast	Pericytes	5.89863e-249	0.00422208	-2.45929	0.0854359
NID1	ITGAV	Fibroblast	Epithelial	5.89863e-249	5.12409e-210	-2.45929	-0.210961
NID1	ITGAV	Fibroblast	CD8	5.89863e-249	6.67778e-18	-2.45929	-0.122785
NID1	ITGAV	Fibroblast	Granulocyte	5.89863e-249	2.38354e-30	-2.45929	-0.402545
NID1	ITGAV	Fibroblast	Acinar	5.89863e-249	1.93424e-18	-2.45929	0.175201
NID1	ITGAV	Fibroblast	Macrophage	5.89863e-249	7.78039e-303	-2.45929	-0.469458
NID1	ITGAV	Fibroblast	Fibroblast	5.89863e-249	1.66879e-78	-2.45929	0.505525
NID1	ITGAV	Fibroblast	Endothelial	5.89863e-249	0.000369087	-2.45929	0.298994
NID1	ITGAV	Fibroblast	Pericytes	5.89863e-249	6.6043e-67	-2.45929	0.939974
NID1	ITGAV	Fibroblast	Cycling	5.89863e-249	1.4896e-29	-2.45929	-0.321895
NID1	ITGB3	Fibroblast	Epithelial	5.89863e-249	2.0559e-09	-2.45929	0.00834496
NID1	ITGB3	Fibroblast	Fibroblast	5.89863e-249	1.77126e-17	-2.45929	-0.198842
NID1	ITGB3	Fibroblast	Endothelial	5.89863e-249	0.00462729	-2.45929	0.0993298
NID1	ITGB3	Fibroblast	Pericytes	5.89863e-249	2.02529e-07	-2.45929	0.136001
MFAP2	NOTCH1	Fibroblast	Epithelial	1.65138e-248	9.96063e-149	1.28292	-0.0828877
MFAP2	NOTCH1	Fibroblast	CD8	1.65138e-248	0.0357353	1.28292	-0.0577529
MFAP2	NOTCH1	Fibroblast	CD4	1.65138e-248	1.3004e-36	1.28292	-0.263532
MFAP2	NOTCH1	Fibroblast	Granulocyte	1.65138e-248	4.54554e-05	1.28292	0.947762
MFAP2	NOTCH1	Fibroblast	Acinar	1.65138e-248	2.21114e-11	1.28292	0.746129
MFAP2	NOTCH1	Fibroblast	Macrophage	1.65138e-248	2.46925e-70	1.28292	-0.0610823
MFAP2	NOTCH1	Fibroblast	Fibroblast	1.65138e-248	5.47659e-12	1.28292	0.0277843
MFAP2	NOTCH1	Fibroblast	Endothelial	1.65138e-248	9.36199e-07	1.28292	0.427386
MFAP2	NOTCH1	Fibroblast	Mast	1.65138e-248	0.00381516	1.28292	-0.229101
MFAP2	NOTCH1	Fibroblast	Cycling	1.65138e-248	5.96219e-10	1.28292	-0.0978686
POMC	MC1R	Epithelial	Macrophage	4.87461e-248	6.20064e-05	-0.164743	-0.00832994
FGL1	EGFR	Granulocyte	Epithelial	6.03557e-246	3.83547e-75	-1.7213	-0.022278
FGL1	EGFR	Granulocyte	Granulocyte	6.03557e-246	7.46215e-15	-1.7213	-0.150645
FGL1	EGFR	Granulocyte	Acinar	6.03557e-246	2.41989e-55	-1.7213	-0.112528
FGL1	EGFR	Granulocyte	Macrophage	6.03557e-246	1.03082e-16	-1.7213	-0.0150589
FGL1	EGFR	Granulocyte	Fibroblast	6.03557e-246	1.29059e-185	-1.7213	-1.24907
FGL1	EGFR	Granulocyte	Pericytes	6.03557e-246	1.34765e-05	-1.7213	-0.210215
APOE	LDLR	Fibroblast	Epithelial	5.53096e-245	0	-2.4033	0.923292
APOE	LDLR	Fibroblast	CD4	5.53096e-245	2.2109e-07	-2.4033	-0.0729748
APOE	LDLR	Fibroblast	Granulocyte	5.53096e-245	4.97997e-33	-2.4033	-0.479058
APOE	LDLR	Fibroblast	Acinar	5.53096e-245	9.74033e-19	-2.4033	-0.202812
APOE	LDLR	Fibroblast	Macrophage	5.53096e-245	5.04319e-33	-2.4033	-0.103205
APOE	LDLR	Fibroblast	Fibroblast	5.53096e-245	4.26014e-68	-2.4033	-0.452418
APOE	LDLR	Fibroblast	Pericytes	5.53096e-245	3.75489e-19	-2.4033	-0.369855
APOE	LDLR	Fibroblast	Mast	5.53096e-245	2.60793e-06	-2.4033	-0.198443
APOE	LDLR	Fibroblast	Plasma	5.53096e-245	2.72024e-13	-2.4033	-0.0411813
APOE	LRP5	Fibroblast	Granulocyte	5.53096e-245	7.30931e-09	-2.4033	-0.0901088
APOE	LRP5	Fibroblast	Acinar	5.53096e-245	2.46375e-30	-2.4033	0.102283
APOE	LRP5	Fibroblast	Fibroblast	5.53096e-245	2.0063e-13	-2.4033	0.0188952
APOE	LRP5	Fibroblast	Pericytes	5.53096e-245	0.000185426	-2.4033	-0.0446293
APOE	LRP5	Fibroblast	Plasma	5.53096e-245	5.9729e-07	-2.4033	-0.0109131
APOE	LRP8	Fibroblast	Epithelial	5.53096e-245	7.90319e-39	-2.4033	0.108369
APOE	LRP8	Fibroblast	Macrophage	5.53096e-245	1.84133e-12	-2.4033	-0.00838264
APOE	LRP8	Fibroblast	Mast	5.53096e-245	0.00216001	-2.4033	-0.0703838
APOE	LRP8	Fibroblast	Plasma	5.53096e-245	0.00955438	-2.4033	-0.0114111
APOE	SORL1	Fibroblast	Epithelial	5.53096e-245	3.48361e-111	-2.4033	-0.1089
APOE	SORL1	Fibroblast	CD4	5.53096e-245	1.41424e-05	-2.4033	-0.0671206
APOE	SORL1	Fibroblast	Granulocyte	5.53096e-245	1.69329e-41	-2.4033	1.21572
APOE	SORL1	Fibroblast	Acinar	5.53096e-245	0	-2.4033	3.46174
APOE	SORL1	Fibroblast	Macrophage	5.53096e-245	2.99657e-175	-2.4033	-0.253312
APOE	SORL1	Fibroblast	B-Cells	5.53096e-245	5.35955e-07	-2.4033	-0.151483
APOE	SORL1	Fibroblast	Pericytes	5.53096e-245	4.36574e-11	-2.4033	-0.126717
APOE	SORL1	Fibroblast	Mast	5.53096e-245	1.42185e-07	-2.4033	-0.665281
APOE	SORL1	Fibroblast	Cycling	5.53096e-245	7.72148e-44	-2.4033	-0.543007
APOE	SORL1	Fibroblast	Plasma	5.53096e-245	5.8648e-29	-2.4033	-0.0765613
APOE	VLDLR	Fibroblast	Epithelial	5.53096e-245	0	-2.4033	-0.180207
APOE	VLDLR	Fibroblast	Granulocyte	5.53096e-245	8.86228e-07	-2.4033	-0.0971392
APOE	VLDLR	Fibroblast	Acinar	5.53096e-245	1.28817e-69	-2.4033	-0.232691
APOE	VLDLR	Fibroblast	Macrophage	5.53096e-245	1.20233e-09	-2.4033	0.041736
APOE	VLDLR	Fibroblast	Cycling	5.53096e-245	7.24713e-12	-2.4033	-0.0989879
APOE	LRP1	Fibroblast	Epithelial	5.53096e-245	1.99124e-148	-2.4033	0.475578
APOE	LRP1	Fibroblast	CD8	5.53096e-245	4.54939e-09	-2.4033	-0.0610558
APOE	LRP1	Fibroblast	Granulocyte	5.53096e-245	1.48994e-08	-2.4033	-0.276267
APOE	LRP1	Fibroblast	Macrophage	5.53096e-245	0	-2.4033	-0.548958
APOE	LRP1	Fibroblast	Fibroblast	5.53096e-245	7.27225e-24	-2.4033	-0.488639
APOE	LRP1	Fibroblast	Cycling	5.53096e-245	4.47323e-09	-2.4033	-0.412677
APOE	LRP1	Fibroblast	NK	5.53096e-245	0.0411012	-2.4033	-0.0933615
APOE	SCARB1	Fibroblast	Epithelial	5.53096e-245	1.83733e-08	-2.4033	0.0692397
APOE	SCARB1	Fibroblast	Acinar	5.53096e-245	1.13677e-09	-2.4033	0.225637
APOE	SCARB1	Fibroblast	Macrophage	5.53096e-245	2.7438e-09	-2.4033	-0.00624529
APOE	SCARB1	Fibroblast	Fibroblast	5.53096e-245	1.99239e-10	-2.4033	0.0315902
APOE	SCARB1	Fibroblast	Pericytes	5.53096e-245	4.99377e-34	-2.4033	-0.37285
LAMA2	ITGA7	Fibroblast	Epithelial	6.40831e-245	2.16412e-05	-2.39746	0.0171568
LAMA2	ITGA7	Fibroblast	Granulocyte	6.40831e-245	5.37341e-49	-2.39746	-0.494612
LAMA2	ITGA7	Fibroblast	Macrophage	6.40831e-245	2.47732e-24	-2.39746	-0.0250303
LAMA2	ITGA7	Fibroblast	Pericytes	6.40831e-245	2.23547e-07	-2.39746	-0.311804
LAMA2	ITGB1	Fibroblast	Epithelial	6.40831e-245	3.15875e-54	-2.39746	0.552297
LAMA2	ITGB1	Fibroblast	CD8	6.40831e-245	0.0132055	-2.39746	0.541011
LAMA2	ITGB1	Fibroblast	CD4	6.40831e-245	7.66525e-49	-2.39746	1.08703
LAMA2	ITGB1	Fibroblast	Granulocyte	6.40831e-245	5.21787e-89	-2.39746	-0.981028
LAMA2	ITGB1	Fibroblast	Acinar	6.40831e-245	3.99966e-73	-2.39746	0.307803
LAMA2	ITGB1	Fibroblast	Macrophage	6.40831e-245	7.4765e-110	-2.39746	-0.207552
LAMA2	ITGB1	Fibroblast	Fibroblast	6.40831e-245	1.11144e-100	-2.39746	0.724058
LAMA2	ITGB1	Fibroblast	Endothelial	6.40831e-245	6.8745e-22	-2.39746	0.822529
LAMA2	ITGB1	Fibroblast	B-Cells	6.40831e-245	9.4663e-17	-2.39746	-0.118561
LAMA2	ITGB1	Fibroblast	Pericytes	6.40831e-245	3.10722e-21	-2.39746	0.360213
LAMA2	RPSA	Fibroblast	Epithelial	6.40831e-245	4.15411e-252	-2.39746	-0.278222
LAMA2	RPSA	Fibroblast	CD8	6.40831e-245	5.06606e-06	-2.39746	-0.121241
LAMA2	RPSA	Fibroblast	CD4	6.40831e-245	0.0380072	-2.39746	0.145364
LAMA2	RPSA	Fibroblast	Granulocyte	6.40831e-245	0	-2.39746	-2.19627
LAMA2	RPSA	Fibroblast	Acinar	6.40831e-245	3.281e-80	-2.39746	0.00222543
LAMA2	RPSA	Fibroblast	Macrophage	6.40831e-245	1.02676e-176	-2.39746	-0.311218
LAMA2	RPSA	Fibroblast	Endothelial	6.40831e-245	0.000760865	-2.39746	-0.389389
LAMA2	RPSA	Fibroblast	B-Cells	6.40831e-245	4.67477e-18	-2.39746	0.240096
LAMA2	RPSA	Fibroblast	Mast	6.40831e-245	2.61453e-16	-2.39746	0.709798
LAMA2	RPSA	Fibroblast	Plasma	6.40831e-245	0.00481459	-2.39746	-0.467208
EGF	EGFR	Epithelial	Epithelial	5.71578e-242	3.83547e-75	-0.0738301	-0.022278
EGF	EGFR	Epithelial	Granulocyte	5.71578e-242	7.46215e-15	-0.0738301	-0.150645
EGF	EGFR	Epithelial	Acinar	5.71578e-242	2.41989e-55	-0.0738301	-0.112528
EGF	EGFR	Epithelial	Macrophage	5.71578e-242	1.03082e-16	-0.0738301	-0.0150589
EGF	EGFR	Epithelial	Fibroblast	5.71578e-242	1.29059e-185	-0.0738301	-1.24907
EGF	EGFR	Epithelial	Pericytes	5.71578e-242	1.34765e-05	-0.0738301	-0.210215
EGF	ERBB2	Epithelial	Epithelial	5.71578e-242	0.000690817	-0.0738301	0.218227
EGF	ERBB2	Epithelial	Granulocyte	5.71578e-242	7.3797e-09	-0.0738301	-0.106978
EGF	ERBB2	Epithelial	Acinar	5.71578e-242	3.17071e-29	-0.0738301	0.0451639
EGF	ERBB2	Epithelial	Fibroblast	5.71578e-242	5.16074e-24	-0.0738301	0.101741
EGF	ERBB3	Epithelial	Epithelial	5.71578e-242	1.06765e-77	-0.0738301	0.702453
EGF	ERBB3	Epithelial	Granulocyte	5.71578e-242	1.42599e-69	-0.0738301	-0.546832
EGF	ERBB3	Epithelial	Acinar	5.71578e-242	1.24988e-74	-0.0738301	0.111963
EGF	ERBB3	Epithelial	Macrophage	5.71578e-242	1.0845e-18	-0.0738301	-0.0118556
EGF	ERBB4	Epithelial	Epithelial	5.71578e-242	0	-0.0738301	-0.216762
EGF	ERBB4	Epithelial	Acinar	5.71578e-242	0.00425845	-0.0738301	-0.0159809
EGF	ERBB4	Epithelial	Cycling	5.71578e-242	1.4908e-13	-0.0738301	-0.0577671
APOD	LEPR	Fibroblast	Epithelial	2.83087e-239	1.40674e-135	-1.64179	0.153395
APOD	LEPR	Fibroblast	Macrophage	2.83087e-239	6.99219e-11	-1.64179	-0.0118042
APOD	LEPR	Fibroblast	Pericytes	2.83087e-239	1.73956e-16	-1.64179	-0.23046
APOD	LEPR	Fibroblast	Plasma	2.83087e-239	0.00126413	-1.64179	-0.0114739
LRPAP1	LRP1	Epithelial	Epithelial	1.72539e-237	1.99124e-148	-0.238692	0.475578
LRPAP1	LRP1	Epithelial	CD8	1.72539e-237	4.54939e-09	-0.238692	-0.0610558
LRPAP1	LRP1	Epithelial	Granulocyte	1.72539e-237	1.48994e-08	-0.238692	-0.276267
LRPAP1	LRP1	Epithelial	Macrophage	1.72539e-237	0	-0.238692	-0.548958
LRPAP1	LRP1	Epithelial	Fibroblast	1.72539e-237	7.27225e-24	-0.238692	-0.488639
LRPAP1	LRP1	Epithelial	Cycling	1.72539e-237	4.47323e-09	-0.238692	-0.412677
LRPAP1	LRP1	Epithelial	NK	1.72539e-237	0.0411012	-0.238692	-0.0933615
LRPAP1	LDLR	Epithelial	Epithelial	1.72539e-237	0	-0.238692	0.923292
LRPAP1	LDLR	Epithelial	CD4	1.72539e-237	2.2109e-07	-0.238692	-0.0729748
LRPAP1	LDLR	Epithelial	Granulocyte	1.72539e-237	4.97997e-33	-0.238692	-0.479058
LRPAP1	LDLR	Epithelial	Acinar	1.72539e-237	9.74033e-19	-0.238692	-0.202812
LRPAP1	LDLR	Epithelial	Macrophage	1.72539e-237	5.04319e-33	-0.238692	-0.103205
LRPAP1	LDLR	Epithelial	Fibroblast	1.72539e-237	4.26014e-68	-0.238692	-0.452418
LRPAP1	LDLR	Epithelial	Pericytes	1.72539e-237	3.75489e-19	-0.238692	-0.369855
LRPAP1	LDLR	Epithelial	Mast	1.72539e-237	2.60793e-06	-0.238692	-0.198443
LRPAP1	LDLR	Epithelial	Plasma	1.72539e-237	2.72024e-13	-0.238692	-0.0411813
LRPAP1	LRP8	Epithelial	Epithelial	1.72539e-237	7.90319e-39	-0.238692	0.108369
LRPAP1	LRP8	Epithelial	Macrophage	1.72539e-237	1.84133e-12	-0.238692	-0.00838264
LRPAP1	LRP8	Epithelial	Mast	1.72539e-237	0.00216001	-0.238692	-0.0703838
LRPAP1	LRP8	Epithelial	Plasma	1.72539e-237	0.00955438	-0.238692	-0.0114111
LRPAP1	SORL1	Epithelial	Epithelial	1.72539e-237	3.48361e-111	-0.238692	-0.1089
LRPAP1	SORL1	Epithelial	CD4	1.72539e-237	1.41424e-05	-0.238692	-0.0671206
LRPAP1	SORL1	Epithelial	Granulocyte	1.72539e-237	1.69329e-41	-0.238692	1.21572
LRPAP1	SORL1	Epithelial	Acinar	1.72539e-237	0	-0.238692	3.46174
LRPAP1	SORL1	Epithelial	Macrophage	1.72539e-237	2.99657e-175	-0.238692	-0.253312
LRPAP1	SORL1	Epithelial	B-Cells	1.72539e-237	5.35955e-07	-0.238692	-0.151483
LRPAP1	SORL1	Epithelial	Pericytes	1.72539e-237	4.36574e-11	-0.238692	-0.126717
LRPAP1	SORL1	Epithelial	Mast	1.72539e-237	1.42185e-07	-0.238692	-0.665281
LRPAP1	SORL1	Epithelial	Cycling	1.72539e-237	7.72148e-44	-0.238692	-0.543007
LRPAP1	SORL1	Epithelial	Plasma	1.72539e-237	5.8648e-29	-0.238692	-0.0765613
LRPAP1	SORT1	Epithelial	Epithelial	1.72539e-237	5.9922e-258	-0.238692	-0.251475
LRPAP1	SORT1	Epithelial	Granulocyte	1.72539e-237	3.79626e-20	-0.238692	-0.679904
LRPAP1	SORT1	Epithelial	Acinar	1.72539e-237	1.09437e-51	-0.238692	0.0122345
LRPAP1	SORT1	Epithelial	Macrophage	1.72539e-237	1.75069e-77	-0.238692	-0.126484
LRPAP1	SORT1	Epithelial	Fibroblast	1.72539e-237	6.97426e-85	-0.238692	0.208069
LRPAP1	SORT1	Epithelial	Cycling	1.72539e-237	8.17564e-31	-0.238692	-0.294904
LRPAP1	VLDLR	Epithelial	Epithelial	1.72539e-237	0	-0.238692	-0.180207
LRPAP1	VLDLR	Epithelial	Granulocyte	1.72539e-237	8.86228e-07	-0.238692	-0.0971392
LRPAP1	VLDLR	Epithelial	Acinar	1.72539e-237	1.28817e-69	-0.238692	-0.232691
LRPAP1	VLDLR	Epithelial	Macrophage	1.72539e-237	1.20233e-09	-0.238692	0.041736
LRPAP1	VLDLR	Epithelial	Cycling	1.72539e-237	7.24713e-12	-0.238692	-0.0989879
IL1RN	IL1R1	Epithelial	Epithelial	2.21415e-234	0	0.425459	-0.964957
IL1RN	IL1R1	Epithelial	CD4	2.21415e-234	1.97622e-06	0.425459	0.183521
IL1RN	IL1R1	Epithelial	Granulocyte	2.21415e-234	0.017278	0.425459	-0.434491
IL1RN	IL1R1	Epithelial	Acinar	2.21415e-234	1.10441e-29	0.425459	0.271864
IL1RN	IL1R1	Epithelial	Cycling	2.21415e-234	4.95194e-22	0.425459	-0.306228
IL1RN	IL1R2	Epithelial	Epithelial	2.21415e-234	1.5789e-109	0.425459	0.24237
IL1RN	IL1R2	Epithelial	CD4	2.21415e-234	0.00026234	0.425459	0.156942
IL1RN	IL1R2	Epithelial	Granulocyte	2.21415e-234	5.57943e-15	0.425459	-0.795908
IL1RN	IL1R2	Epithelial	Acinar	2.21415e-234	2.19073e-127	0.425459	1.18761
IL1RN	IL1R2	Epithelial	Macrophage	2.21415e-234	7.51375e-152	0.425459	-0.367511
COL5A2	DDR1	Fibroblast	Epithelial	4.61698e-233	1.93137e-37	1.76202	0.0944046
COL5A2	DDR1	Fibroblast	Granulocyte	4.61698e-233	4.91559e-24	1.76202	-0.24638
COL5A2	DDR1	Fibroblast	Acinar	4.61698e-233	4.56989e-53	1.76202	-0.0504608
COL5A2	DDR1	Fibroblast	Pericytes	4.61698e-233	0.00484717	1.76202	0.0631909
COL5A2	DDR1	Fibroblast	Cycling	4.61698e-233	0.000284406	1.76202	-0.0746372
ADAM9	ITGA6	Macrophage	Epithelial	5.25396e-233	1.81256e-206	-0.341618	1.08414
ADAM9	ITGA6	Macrophage	CD8	5.25396e-233	2.95925e-05	-0.341618	-0.170167
ADAM9	ITGA6	Macrophage	CD4	5.25396e-233	1.73231e-26	-0.341618	-0.37345
ADAM9	ITGA6	Macrophage	Granulocyte	5.25396e-233	5.49129e-19	-0.341618	-0.23018
ADAM9	ITGA6	Macrophage	Acinar	5.25396e-233	1.23561e-132	-0.341618	-0.20964
ADAM9	ITGA6	Macrophage	Macrophage	5.25396e-233	4.83242e-193	-0.341618	-0.266594
ADAM9	ITGA6	Macrophage	Endothelial	5.25396e-233	1.14835e-10	-0.341618	0.651675
ADAM9	ITGA6	Macrophage	Pericytes	5.25396e-233	3.37222e-43	-0.341618	-0.655421
ADAM9	ITGA6	Macrophage	Mast	5.25396e-233	0.00216001	-0.341618	-0.0484321
ADAM9	ITGAV	Macrophage	Epithelial	5.25396e-233	5.12409e-210	-0.341618	-0.210961
ADAM9	ITGAV	Macrophage	CD8	5.25396e-233	6.67778e-18	-0.341618	-0.122785
ADAM9	ITGAV	Macrophage	Granulocyte	5.25396e-233	2.38354e-30	-0.341618	-0.402545
ADAM9	ITGAV	Macrophage	Acinar	5.25396e-233	1.93424e-18	-0.341618	0.175201
ADAM9	ITGAV	Macrophage	Macrophage	5.25396e-233	7.78039e-303	-0.341618	-0.469458
ADAM9	ITGAV	Macrophage	Fibroblast	5.25396e-233	1.66879e-78	-0.341618	0.505525
ADAM9	ITGAV	Macrophage	Endothelial	5.25396e-233	0.000369087	-0.341618	0.298994
ADAM9	ITGAV	Macrophage	Pericytes	5.25396e-233	6.6043e-67	-0.341618	0.939974
ADAM9	ITGAV	Macrophage	Cycling	5.25396e-233	1.4896e-29	-0.341618	-0.321895
ADAM9	ITGB1	Macrophage	Epithelial	5.25396e-233	3.15875e-54	-0.341618	0.552297
ADAM9	ITGB1	Macrophage	CD8	5.25396e-233	0.0132055	-0.341618	0.541011
ADAM9	ITGB1	Macrophage	CD4	5.25396e-233	7.66525e-49	-0.341618	1.08703
ADAM9	ITGB1	Macrophage	Granulocyte	5.25396e-233	5.21787e-89	-0.341618	-0.981028
ADAM9	ITGB1	Macrophage	Acinar	5.25396e-233	3.99966e-73	-0.341618	0.307803
ADAM9	ITGB1	Macrophage	Macrophage	5.25396e-233	7.4765e-110	-0.341618	-0.207552
ADAM9	ITGB1	Macrophage	Fibroblast	5.25396e-233	1.11144e-100	-0.341618	0.724058
ADAM9	ITGB1	Macrophage	Endothelial	5.25396e-233	6.8745e-22	-0.341618	0.822529
ADAM9	ITGB1	Macrophage	B-Cells	5.25396e-233	9.4663e-17	-0.341618	-0.118561
ADAM9	ITGB1	Macrophage	Pericytes	5.25396e-233	3.10722e-21	-0.341618	0.360213
ADAM9	ITGB5	Macrophage	Epithelial	5.25396e-233	4.36009e-47	-0.341618	0.639393
ADAM9	ITGB5	Macrophage	Macrophage	5.25396e-233	9.80092e-154	-0.341618	-0.272626
ADAM9	ITGB5	Macrophage	Fibroblast	5.25396e-233	2.51456e-121	-0.341618	0.812175
ADAM9	ITGB5	Macrophage	Endothelial	5.25396e-233	0.000931402	-0.341618	-0.388296
ADAM9	ITGB5	Macrophage	Cycling	5.25396e-233	0.00019491	-0.341618	0.0653627
ADAM9	ITGB5	Macrophage	NK	5.25396e-233	0.000166277	-0.341618	-0.0944836
ADAM9	ITGA3	Macrophage	Epithelial	5.25396e-233	7.99582e-229	-0.341618	1.04959
ADAM9	ITGA3	Macrophage	Granulocyte	5.25396e-233	6.44539e-18	-0.341618	-0.112182
ADAM9	ITGA3	Macrophage	Acinar	5.25396e-233	4.71169e-05	-0.341618	0.349836
ADAM9	ITGA3	Macrophage	Macrophage	5.25396e-233	0.000311281	-0.341618	-0.00974927
ADAM9	ITGA3	Macrophage	Endothelial	5.25396e-233	1.50054e-07	-0.341618	0.169359
ADAM9	ITGA3	Macrophage	Pericytes	5.25396e-233	0.00167954	-0.341618	0.188583
ADAM9	ITGA3	Macrophage	NK	5.25396e-233	0.000166277	-0.341618	-0.0673099
VCAN	CD44	Fibroblast	Epithelial	2.43852e-230	5.21275e-124	1.59463	-0.169094
VCAN	CD44	Fibroblast	CD8	2.43852e-230	1.74454e-19	1.59463	0.512652
VCAN	CD44	Fibroblast	CD4	2.43852e-230	1.30883e-18	1.59463	0.511945
VCAN	CD44	Fibroblast	Acinar	2.43852e-230	1.6862e-41	1.59463	0.663397
VCAN	CD44	Fibroblast	Macrophage	2.43852e-230	1.2466e-64	1.59463	0.786408
VCAN	CD44	Fibroblast	Fibroblast	2.43852e-230	4.87529e-23	1.59463	-0.734852
VCAN	CD44	Fibroblast	Pericytes	2.43852e-230	3.40416e-13	1.59463	0.406512
VCAN	CD44	Fibroblast	Mast	2.43852e-230	1.43683e-15	1.59463	0.858086
VCAN	CD44	Fibroblast	Cycling	2.43852e-230	0.0208429	1.59463	0.0151378
VCAN	EGFR	Fibroblast	Epithelial	2.43852e-230	3.83547e-75	1.59463	-0.022278
VCAN	EGFR	Fibroblast	Granulocyte	2.43852e-230	7.46215e-15	1.59463	-0.150645
VCAN	EGFR	Fibroblast	Acinar	2.43852e-230	2.41989e-55	1.59463	-0.112528
VCAN	EGFR	Fibroblast	Macrophage	2.43852e-230	1.03082e-16	1.59463	-0.0150589
VCAN	EGFR	Fibroblast	Fibroblast	2.43852e-230	1.29059e-185	1.59463	-1.24907
VCAN	EGFR	Fibroblast	Pericytes	2.43852e-230	1.34765e-05	1.59463	-0.210215
VCAN	ITGA4	Fibroblast	Epithelial	2.43852e-230	0.000411333	1.59463	0.0071396
VCAN	ITGA4	Fibroblast	CD8	2.43852e-230	0.013142	1.59463	0.29551
VCAN	ITGA4	Fibroblast	CD4	2.43852e-230	1.9479e-10	1.59463	0.560218
VCAN	ITGA4	Fibroblast	Acinar	2.43852e-230	1.52282e-10	1.59463	0.360247
VCAN	ITGA4	Fibroblast	Macrophage	2.43852e-230	1.27267e-156	1.59463	-0.0212363
VCAN	ITGA4	Fibroblast	Fibroblast	2.43852e-230	8.52213e-08	1.59463	0.047186
VCAN	ITGA4	Fibroblast	Plasma	2.43852e-230	6.69632e-17	1.59463	-0.0366525
VCAN	ITGB1	Fibroblast	Epithelial	2.43852e-230	3.15875e-54	1.59463	0.552297
VCAN	ITGB1	Fibroblast	CD8	2.43852e-230	0.0132055	1.59463	0.541011
VCAN	ITGB1	Fibroblast	CD4	2.43852e-230	7.66525e-49	1.59463	1.08703
VCAN	ITGB1	Fibroblast	Granulocyte	2.43852e-230	5.21787e-89	1.59463	-0.981028
VCAN	ITGB1	Fibroblast	Acinar	2.43852e-230	3.99966e-73	1.59463	0.307803
VCAN	ITGB1	Fibroblast	Macrophage	2.43852e-230	7.4765e-110	1.59463	-0.207552
VCAN	ITGB1	Fibroblast	Fibroblast	2.43852e-230	1.11144e-100	1.59463	0.724058
VCAN	ITGB1	Fibroblast	Endothelial	2.43852e-230	6.8745e-22	1.59463	0.822529
VCAN	ITGB1	Fibroblast	B-Cells	2.43852e-230	9.4663e-17	1.59463	-0.118561
VCAN	ITGB1	Fibroblast	Pericytes	2.43852e-230	3.10722e-21	1.59463	0.360213
VCAN	SELP	Fibroblast	Endothelial	2.43852e-230	9.67689e-29	1.59463	1.05612
VCAN	TLR2	Fibroblast	Epithelial	2.43852e-230	7.02129e-48	1.59463	-0.0272731
VCAN	TLR2	Fibroblast	Acinar	2.43852e-230	1.20708e-69	1.59463	1.3497
VCAN	TLR2	Fibroblast	Macrophage	2.43852e-230	7.34482e-104	1.59463	-0.115173
VCAN	TLR2	Fibroblast	Mast	2.43852e-230	0.000377025	1.59463	-0.280745
VCAN	TLR2	Fibroblast	Cycling	2.43852e-230	3.45975e-23	1.59463	-0.258518
MMP7	CD151	Epithelial	Epithelial	6.47392e-229	1.78391e-169	-0.0641284	0.782304
MMP7	CD151	Epithelial	CD8	6.47392e-229	7.95565e-11	-0.0641284	-0.138191
MMP7	CD151	Epithelial	CD4	6.47392e-229	0.0253088	-0.0641284	-0.0392092
MMP7	CD151	Epithelial	Granulocyte	6.47392e-229	5.93105e-69	-0.0641284	-0.70769
MMP7	CD151	Epithelial	Acinar	6.47392e-229	1.82206e-104	-0.0641284	0.114193
MMP7	CD151	Epithelial	Macrophage	6.47392e-229	1.35972e-94	-0.0641284	-0.15428
MMP7	CD151	Epithelial	Fibroblast	6.47392e-229	9.43846e-60	-0.0641284	0.419531
MMP7	CD151	Epithelial	Pericytes	6.47392e-229	3.89633e-11	-0.0641284	0.508768
MMP7	CD44	Epithelial	Epithelial	6.47392e-229	5.21275e-124	-0.0641284	-0.169094
MMP7	CD44	Epithelial	CD8	6.47392e-229	1.74454e-19	-0.0641284	0.512652
MMP7	CD44	Epithelial	CD4	6.47392e-229	1.30883e-18	-0.0641284	0.511945
MMP7	CD44	Epithelial	Acinar	6.47392e-229	1.6862e-41	-0.0641284	0.663397
MMP7	CD44	Epithelial	Macrophage	6.47392e-229	1.2466e-64	-0.0641284	0.786408
MMP7	CD44	Epithelial	Fibroblast	6.47392e-229	4.87529e-23	-0.0641284	-0.734852
MMP7	CD44	Epithelial	Pericytes	6.47392e-229	3.40416e-13	-0.0641284	0.406512
MMP7	CD44	Epithelial	Mast	6.47392e-229	1.43683e-15	-0.0641284	0.858086
MMP7	CD44	Epithelial	Cycling	6.47392e-229	0.0208429	-0.0641284	0.0151378
MMP7	ERBB4	Epithelial	Epithelial	6.47392e-229	0	-0.0641284	-0.216762
MMP7	ERBB4	Epithelial	Acinar	6.47392e-229	0.00425845	-0.0641284	-0.0159809
MMP7	ERBB4	Epithelial	Cycling	6.47392e-229	1.4908e-13	-0.0641284	-0.0577671
EFNA2	EPHA2	Epithelial	Epithelial	7.01371e-229	8.21587e-11	0.226815	0.359746
EFNA2	EPHA2	Epithelial	Pericytes	7.01371e-229	4.48694e-17	0.226815	-0.270829
EFNA2	EPHA3	Epithelial	Fibroblast	7.01371e-229	1.17421e-38	0.226815	0.490664
EFNA2	EPHA3	Epithelial	Pericytes	7.01371e-229	0.00116764	0.226815	-0.128546
EFNA2	EPHA4	Epithelial	Epithelial	7.01371e-229	0	0.226815	0.283743
EFNA2	EPHA4	Epithelial	Acinar	7.01371e-229	4.38269e-40	0.226815	0.113943
EFNA2	EPHA4	Epithelial	Pericytes	7.01371e-229	2.48768e-16	0.226815	-0.167133
EFNA2	EPHA4	Epithelial	Cycling	7.01371e-229	0.00235353	0.226815	0.0623996
MST1	MST1R	Epithelial	Epithelial	8.07923e-229	0	-0.17638	0.411814
MST1	MST1R	Epithelial	Cycling	8.07923e-229	9.06885e-08	-0.17638	0.17817
FN1	ITGA2	Pericytes	Epithelial	4.19246e-226	0	3.33248	1.51184
FN1	ITGA2	Pericytes	CD8	4.19246e-226	0.001315	3.33248	-0.0424823
FN1	ITGA2	Pericytes	Granulocyte	4.19246e-226	1.26442e-05	3.33248	-0.105921
FN1	ITGA2	Pericytes	Fibroblast	4.19246e-226	1.09254e-49	3.33248	0.292511
FN1	ITGA2	Pericytes	Endothelial	4.19246e-226	2.74857e-49	3.33248	0.623198
FN1	ITGA4	Pericytes	Epithelial	4.19246e-226	0.000411333	3.33248	0.0071396
FN1	ITGA4	Pericytes	CD8	4.19246e-226	0.013142	3.33248	0.29551
FN1	ITGA4	Pericytes	CD4	4.19246e-226	1.9479e-10	3.33248	0.560218
FN1	ITGA4	Pericytes	Acinar	4.19246e-226	1.52282e-10	3.33248	0.360247
FN1	ITGA4	Pericytes	Macrophage	4.19246e-226	1.27267e-156	3.33248	-0.0212363
FN1	ITGA4	Pericytes	Fibroblast	4.19246e-226	8.52213e-08	3.33248	0.047186
FN1	ITGA4	Pericytes	Plasma	4.19246e-226	6.69632e-17	3.33248	-0.0366525
FN1	ITGA5	Pericytes	Epithelial	4.19246e-226	0	3.33248	-0.162179
FN1	ITGA5	Pericytes	Acinar	4.19246e-226	6.25867e-13	3.33248	0.858009
FN1	ITGA5	Pericytes	Macrophage	4.19246e-226	6.97981e-79	3.33248	-0.126124
FN1	ITGA5	Pericytes	Endothelial	4.19246e-226	2.3746e-48	3.33248	1.06539
FN1	ITGA5	Pericytes	Cycling	4.19246e-226	1.27181e-24	3.33248	-0.228415
FN1	ITGA8	Pericytes	Endothelial	4.19246e-226	3.18853e-17	3.33248	0.245304
FN1	ITGB1	Pericytes	Epithelial	4.19246e-226	3.15875e-54	3.33248	0.552297
FN1	ITGB1	Pericytes	CD8	4.19246e-226	0.0132055	3.33248	0.541011
FN1	ITGB1	Pericytes	CD4	4.19246e-226	7.66525e-49	3.33248	1.08703
FN1	ITGB1	Pericytes	Granulocyte	4.19246e-226	5.21787e-89	3.33248	-0.981028
FN1	ITGB1	Pericytes	Acinar	4.19246e-226	3.99966e-73	3.33248	0.307803
FN1	ITGB1	Pericytes	Macrophage	4.19246e-226	7.4765e-110	3.33248	-0.207552
FN1	ITGB1	Pericytes	Fibroblast	4.19246e-226	1.11144e-100	3.33248	0.724058
FN1	ITGB1	Pericytes	Endothelial	4.19246e-226	6.8745e-22	3.33248	0.822529
FN1	ITGB1	Pericytes	B-Cells	4.19246e-226	9.4663e-17	3.33248	-0.118561
FN1	ITGB1	Pericytes	Pericytes	4.19246e-226	3.10722e-21	3.33248	0.360213
FN1	ITGB3	Pericytes	Epithelial	4.19246e-226	2.0559e-09	3.33248	0.00834496
FN1	ITGB3	Pericytes	Fibroblast	4.19246e-226	1.77126e-17	3.33248	-0.198842
FN1	ITGB3	Pericytes	Endothelial	4.19246e-226	0.00462729	3.33248	0.0993298
FN1	ITGB3	Pericytes	Pericytes	4.19246e-226	2.02529e-07	3.33248	0.136001
FN1	ITGB6	Pericytes	Epithelial	4.19246e-226	2.47404e-239	3.33248	1.40563
FN1	ITGB6	Pericytes	Cycling	4.19246e-226	0.0281678	3.33248	0.515915
FN1	SDC2	Pericytes	Epithelial	4.19246e-226	0	3.33248	-0.579712
FN1	SDC2	Pericytes	Granulocyte	4.19246e-226	1.267e-21	3.33248	-0.348546
FN1	SDC2	Pericytes	Acinar	4.19246e-226	2.15164e-127	3.33248	-0.204166
FN1	SDC2	Pericytes	Pericytes	4.19246e-226	1.11445e-86	3.33248	1.10568
FN1	SDC2	Pericytes	Cycling	4.19246e-226	1.71993e-53	3.33248	-0.281254
FN1	CD44	Pericytes	Epithelial	4.19246e-226	5.21275e-124	3.33248	-0.169094
FN1	CD44	Pericytes	CD8	4.19246e-226	1.74454e-19	3.33248	0.512652
FN1	CD44	Pericytes	CD4	4.19246e-226	1.30883e-18	3.33248	0.511945
FN1	CD44	Pericytes	Acinar	4.19246e-226	1.6862e-41	3.33248	0.663397
FN1	CD44	Pericytes	Macrophage	4.19246e-226	1.2466e-64	3.33248	0.786408
FN1	CD44	Pericytes	Fibroblast	4.19246e-226	4.87529e-23	3.33248	-0.734852
FN1	CD44	Pericytes	Pericytes	4.19246e-226	3.40416e-13	3.33248	0.406512
FN1	CD44	Pericytes	Mast	4.19246e-226	1.43683e-15	3.33248	0.858086
FN1	CD44	Pericytes	Cycling	4.19246e-226	0.0208429	3.33248	0.0151378
FN1	COL13A1	Pericytes	Fibroblast	4.19246e-226	4.96716e-24	3.33248	0.0876046
FN1	COL13A1	Pericytes	Endothelial	4.19246e-226	1.05516e-39	3.33248	0.489181
FN1	COL13A1	Pericytes	Pericytes	4.19246e-226	0.00422208	3.33248	0.0854359
FN1	ITGA3	Pericytes	Epithelial	4.19246e-226	7.99582e-229	3.33248	1.04959
FN1	ITGA3	Pericytes	Granulocyte	4.19246e-226	6.44539e-18	3.33248	-0.112182
FN1	ITGA3	Pericytes	Acinar	4.19246e-226	4.71169e-05	3.33248	0.349836
FN1	ITGA3	Pericytes	Macrophage	4.19246e-226	0.000311281	3.33248	-0.00974927
FN1	ITGA3	Pericytes	Endothelial	4.19246e-226	1.50054e-07	3.33248	0.169359
FN1	ITGA3	Pericytes	Pericytes	4.19246e-226	0.00167954	3.33248	0.188583
FN1	ITGA3	Pericytes	NK	4.19246e-226	0.000166277	3.33248	-0.0673099
FN1	ITGA9	Pericytes	Macrophage	4.19246e-226	2.77903e-212	3.33248	-0.240045
FN1	ITGA9	Pericytes	Fibroblast	4.19246e-226	4.79553e-20	3.33248	0.0746288
FN1	ITGA9	Pericytes	Pericytes	4.19246e-226	4.52297e-12	3.33248	-0.0831755
FN1	ITGA9	Pericytes	Cycling	4.19246e-226	8.24694e-10	3.33248	-0.0847481
FN1	ITGAV	Pericytes	Epithelial	4.19246e-226	5.12409e-210	3.33248	-0.210961
FN1	ITGAV	Pericytes	CD8	4.19246e-226	6.67778e-18	3.33248	-0.122785
FN1	ITGAV	Pericytes	Granulocyte	4.19246e-226	2.38354e-30	3.33248	-0.402545
FN1	ITGAV	Pericytes	Acinar	4.19246e-226	1.93424e-18	3.33248	0.175201
FN1	ITGAV	Pericytes	Macrophage	4.19246e-226	7.78039e-303	3.33248	-0.469458
FN1	ITGAV	Pericytes	Fibroblast	4.19246e-226	1.66879e-78	3.33248	0.505525
FN1	ITGAV	Pericytes	Endothelial	4.19246e-226	0.000369087	3.33248	0.298994
FN1	ITGAV	Pericytes	Pericytes	4.19246e-226	6.6043e-67	3.33248	0.939974
FN1	ITGAV	Pericytes	Cycling	4.19246e-226	1.4896e-29	3.33248	-0.321895
FN1	ITGB7	Pericytes	CD8	4.19246e-226	8.30012e-16	3.33248	0.4236
FN1	ITGB7	Pericytes	CD4	4.19246e-226	6.87747e-20	3.33248	0.339348
FN1	ITGB7	Pericytes	Macrophage	4.19246e-226	5.22074e-29	3.33248	0.210669
FN1	ITGB7	Pericytes	Cycling	4.19246e-226	0.0449845	3.33248	0.426806
FN1	NT5E	Pericytes	Epithelial	4.19246e-226	0	3.33248	0.490565
FN1	NT5E	Pericytes	CD4	4.19246e-226	0.00060952	3.33248	-0.0315529
FN1	NT5E	Pericytes	Acinar	4.19246e-226	2.92382e-15	3.33248	0.107356
FN1	NT5E	Pericytes	Macrophage	4.19246e-226	3.44579e-23	3.33248	0.118601
FN1	NT5E	Pericytes	Fibroblast	4.19246e-226	0.00268636	3.33248	-0.196416
FN1	NT5E	Pericytes	Endothelial	4.19246e-226	3.69603e-19	3.33248	0.328078
FN1	NT5E	Pericytes	Pericytes	4.19246e-226	2.87693e-14	3.33248	0.294298
FN1	NT5E	Pericytes	Cycling	4.19246e-226	5.18794e-06	3.33248	0.251603
FN1	PLAUR	Pericytes	Epithelial	4.19246e-226	0	3.33248	1.27925
FN1	PLAUR	Pericytes	Granulocyte	4.19246e-226	1.02078e-25	3.33248	1.53765
FN1	PLAUR	Pericytes	Acinar	4.19246e-226	3.13011e-233	3.33248	1.90858
FN1	PLAUR	Pericytes	Fibroblast	4.19246e-226	2.80123e-05	3.33248	0.0900659
FN1	PLAUR	Pericytes	Pericytes	4.19246e-226	4.50724e-07	3.33248	0.00454997
FN1	TMPRSS6	Pericytes	Epithelial	4.19246e-226	2.2994e-10	3.33248	0.0111924
FN1	TNFRSF11B	Pericytes	Epithelial	4.19246e-226	5.11409e-19	3.33248	0.351232
FN1	TNFRSF11B	Pericytes	Fibroblast	4.19246e-226	0.00318907	3.33248	0.0650777
FN1	TNFRSF11B	Pericytes	Endothelial	4.19246e-226	1.90637e-18	3.33248	0.18246
FN1	TNFRSF11B	Pericytes	Pericytes	4.19246e-226	6.32699e-24	3.33248	0.280972
FN1	TNFRSF11B	Pericytes	Plasma	4.19246e-226	0.00126413	3.33248	-0.0136624
NMB	GRPR	Epithelial	Epithelial	5.51868e-226	7.4162e-89	-0.0812721	-0.013697
NMB	GRPR	Epithelial	Acinar	5.51868e-226	1.01941e-32	-0.0812721	-0.108716
APP	FPR2	Epithelial	Granulocyte	1.33259e-223	8.33166e-09	-0.359779	1.18962
APP	FPR2	Epithelial	Acinar	1.33259e-223	1.09155e-76	-0.359779	0.592288
APP	CAV1	Epithelial	Granulocyte	1.33259e-223	1.33875e-10	-0.359779	-0.288825
APP	CAV1	Epithelial	Macrophage	1.33259e-223	5.44162e-05	-0.359779	-0.0306868
APP	CAV1	Epithelial	Fibroblast	1.33259e-223	0.000306967	-0.359779	-0.0110182
APP	CAV1	Epithelial	Endothelial	1.33259e-223	2.35955e-15	-0.359779	-0.53872
APP	CAV1	Epithelial	Pericytes	1.33259e-223	5.89004e-21	-0.359779	-0.51666
APP	CAV1	Epithelial	NK	1.33259e-223	0.000166277	-0.359779	-0.340993
APP	CD74	Epithelial	Epithelial	1.33259e-223	2.65398e-79	-0.359779	0.34401
APP	CD74	Epithelial	CD8	1.33259e-223	0.00973971	-0.359779	-0.326951
APP	CD74	Epithelial	CD4	1.33259e-223	2.80555e-09	-0.359779	0.564911
APP	CD74	Epithelial	Granulocyte	1.33259e-223	4.17861e-97	-0.359779	-1.15749
APP	CD74	Epithelial	Macrophage	1.33259e-223	3.21784e-15	-0.359779	0.516272
APP	CD74	Epithelial	Fibroblast	1.33259e-223	0.000607599	-0.359779	-0.291289
APP	CD74	Epithelial	Endothelial	1.33259e-223	1.30998e-18	-0.359779	-0.491178
APP	CD74	Epithelial	B-Cells	1.33259e-223	6.50138e-174	-0.359779	0.768964
APP	CD74	Epithelial	Pericytes	1.33259e-223	1.38159e-50	-0.359779	-1.8792
APP	CD74	Epithelial	Mast	1.33259e-223	7.63929e-06	-0.359779	-0.427557
APP	CD74	Epithelial	Cycling	1.33259e-223	1.83176e-08	-0.359779	0.187944
APP	CD74	Epithelial	Plasma	1.33259e-223	3.54041e-49	-0.359779	-1.50502
APP	GPC1	Epithelial	Epithelial	1.33259e-223	0.000432424	-0.359779	0.138874
APP	GPC1	Epithelial	Granulocyte	1.33259e-223	0.011637	-0.359779	-0.0170515
APP	GPC1	Epithelial	Acinar	1.33259e-223	6.36811e-26	-0.359779	0.025549
APP	GPC1	Epithelial	Fibroblast	1.33259e-223	6.51354e-70	-0.359779	0.416915
APP	GPC1	Epithelial	Pericytes	1.33259e-223	4.54408e-18	-0.359779	0.311319
APP	LRP1	Epithelial	Epithelial	1.33259e-223	1.99124e-148	-0.359779	0.475578
APP	LRP1	Epithelial	CD8	1.33259e-223	4.54939e-09	-0.359779	-0.0610558
APP	LRP1	Epithelial	Granulocyte	1.33259e-223	1.48994e-08	-0.359779	-0.276267
APP	LRP1	Epithelial	Macrophage	1.33259e-223	0	-0.359779	-0.548958
APP	LRP1	Epithelial	Fibroblast	1.33259e-223	7.27225e-24	-0.359779	-0.488639
APP	LRP1	Epithelial	Cycling	1.33259e-223	4.47323e-09	-0.359779	-0.412677
APP	LRP1	Epithelial	NK	1.33259e-223	0.0411012	-0.359779	-0.0933615
APP	NCSTN	Epithelial	Epithelial	1.33259e-223	1.89111e-08	-0.359779	0.0600116
APP	NCSTN	Epithelial	Acinar	1.33259e-223	3.86518e-54	-0.359779	0.147802
APP	NCSTN	Epithelial	Macrophage	1.33259e-223	2.54154e-07	-0.359779	0.0831594
APP	NCSTN	Epithelial	Fibroblast	1.33259e-223	0.00208499	-0.359779	-0.000408806
APP	NCSTN	Epithelial	Endothelial	1.33259e-223	0.0316334	-0.359779	0.171913
APP	NCSTN	Epithelial	B-Cells	1.33259e-223	0.0347758	-0.359779	-0.0928896
APP	NCSTN	Epithelial	Cycling	1.33259e-223	0.00016222	-0.359779	-0.0365676
APP	TNFRSF21	Epithelial	Epithelial	1.33259e-223	1.93687e-69	-0.359779	0.521807
APP	TNFRSF21	Epithelial	Pericytes	1.33259e-223	3.25678e-05	-0.359779	-0.117084
SERPINE2	LRP1	Epithelial	Epithelial	8.624e-223	1.99124e-148	0.539773	0.475578
[truncated: 83,618 more rows]

## Sheet: Supplemental Table 3
Supplemental Table 3) Differential gene expression using linear mixed model analysis of cell types from spatial transcriptomic ROIs.
Gene	Cell Type	logFC	p_value	p_adj
A2M	Healthy_ADM	0.620483	0.00142321	0.0483828
ACADM	Healthy_ADM	0.0308976	0.757338	0.86923
ACADS	Healthy_ADM	-0.0674439	0.276813	0.523573
ACAT1	Healthy_ADM	0.00351401	0.977088	0.987629
PSEN1	Healthy_ADM	-0.254944	0.0161302	0.17504
ALDOB	Healthy_ADM	-0.599926	0.0129322	0.159997
APOE	Healthy_ADM	0.323319	0.0656588	0.306102
ASL	Healthy_ADM	-0.292358	0.000816642	0.0313713
ASS1	Healthy_ADM	-0.284669	0.152259	0.410458
ATM	Healthy_ADM	-0.0529114	0.505009	0.702387
ATP7B	Healthy_ADM	-0.271791	0.211023	0.465649
BTD	Healthy_ADM	-0.058188	0.611925	0.778381
SERPING1	Healthy_ADM	1.14714	1.27508e-07	2.96861e-05
C3	Healthy_ADM	1.41487	0.0701679	0.315152
CA2	Healthy_ADM	-0.580477	0.00874726	0.135359
CBS	Healthy_ADM	-0.109981	0.558015	0.741119
CDK4	Healthy_ADM	-0.18315	0.0731504	0.322256
CDKN1C	Healthy_ADM	0.331779	0.00875928	0.135359
CNGA1	Healthy_ADM	-0.0101418	0.917478	0.958002
COL1A1	Healthy_ADM	-0.303344	0.520674	0.713327
COL1A2	Healthy_ADM	0.65985	0.0451767	0.265685
COL5A1	Healthy_ADM	0.105132	0.422065	0.642208
CST3	Healthy_ADM	-0.381966	0.000897945	0.0338182
CSTB	Healthy_ADM	-0.0994167	0.42094	0.641429
DLD	Healthy_ADM	0.0381609	0.530827	0.721193
EMD	Healthy_ADM	0.221238	0.0843905	0.336794
EPHX1	Healthy_ADM	0.274689	0.0841164	0.336661
ERCC5	Healthy_ADM	0.0580059	0.533277	0.722605
F5	Healthy_ADM	-0.137163	0.433545	0.649541
FGFR2	Healthy_ADM	0.469515	0.000521776	0.0227923
FH	Healthy_ADM	0.0578058	0.473293	0.678562
FUCA1	Healthy_ADM	-0.0141513	0.851871	0.924294
FUT6	Healthy_ADM	-0.12542	0.456616	0.665131
GALC	Healthy_ADM	0.0436849	0.627568	0.789262
GALT	Healthy_ADM	-0.0824887	0.429234	0.647261
GBE1	Healthy_ADM	0.040529	0.635018	0.79238
GIPR	Healthy_ADM	-0.0482687	0.801746	0.895843
GJB1	Healthy_ADM	-0.196306	0.019635	0.188419
GK	Healthy_ADM	-0.0297597	0.766543	0.875239
GPI	Healthy_ADM	-0.0266769	0.827142	0.911101
GSN	Healthy_ADM	0.328397	0.185167	0.442476
GUSB	Healthy_ADM	0.0248396	0.752362	0.865718
HADHA	Healthy_ADM	0.0318816	0.665526	0.812528
HADHB	Healthy_ADM	0.114021	0.266821	0.514684
HGD	Healthy_ADM	-0.0824053	0.449901	0.661213
HK1	Healthy_ADM	-0.167251	0.234144	0.48576
SHH	Healthy_ADM	-0.924915	0.0456084	0.266674
HPS1	Healthy_ADM	0.181325	0.0330996	0.239497
HSD11B2	Healthy_ADM	-0.311252	0.223829	0.477158
SGSH	Healthy_ADM	-0.0138267	0.809361	0.899642
ICAM1	Healthy_ADM	0.22422	0.0551996	0.28733
IDS	Healthy_ADM	0.156731	0.166095	0.424697
IDUA	Healthy_ADM	-0.0113542	0.910562	0.953372
CFI	Healthy_ADM	0.493869	0.000932957	0.0347957
IL2RG	Healthy_ADM	-0.3696	0.0238289	0.207571
INS	Healthy_ADM	1.93238	0.0173164	0.18101
INSR	Healthy_ADM	-0.140243	0.316333	0.558196
ITGA6	Healthy_ADM	-0.231081	0.1875	0.444257
JAG1	Healthy_ADM	0.240989	0.170071	0.427402
KRT18	Healthy_ADM	0.955127	0.0682194	0.310897
LAMA3	Healthy_ADM	-0.312304	0.257761	0.506361
LAMB3	Healthy_ADM	-0.524265	0.260745	0.509358
SGCB	Healthy_ADM	0.0199687	0.784188	0.885106
LIPA	Healthy_ADM	0.208266	0.0156362	0.174612
LYZ	Healthy_ADM	-1.40379	0.00733712	0.12611
PTCH1	Healthy_ADM	0.104244	0.279913	0.52631
NF1	Healthy_ADM	0.123044	0.0459256	0.26812
PNP	Healthy_ADM	-0.158593	0.137557	0.395652
OAT	Healthy_ADM	-0.169407	0.198805	0.455988
PCBD1	Healthy_ADM	-0.143681	0.0824387	0.334943
PCCA	Healthy_ADM	0.145753	0.147086	0.405261
PDHA1	Healthy_ADM	0.0188402	0.807222	0.89835
PEPD	Healthy_ADM	-0.0744637	0.405295	0.630616
PGK1	Healthy_ADM	0.130969	0.354086	0.591646
PHKA2	Healthy_ADM	0.0124178	0.866027	0.931921
PHKB	Healthy_ADM	-0.00594995	0.948861	0.972676
SERPINA1	Healthy_ADM	1.51013	0.0615346	0.300089
PLOD1	Healthy_ADM	0.384118	0.0523715	0.280224
PON2	Healthy_ADM	0.212247	0.0176706	0.181702
PRNP	Healthy_ADM	0.474095	0.00288827	0.0754781
PROS1	Healthy_ADM	-0.0442939	0.532618	0.72202
PTH	Healthy_ADM	-0.183334	0.452904	0.66288
PTS	Healthy_ADM	0.0133111	0.853735	0.92574
RPE65	Healthy_ADM	-0.388459	0.0139543	0.164414
RS1	Healthy_ADM	-1.25657	0.171573	0.429101
ATXN1	Healthy_ADM	-0.0155813	0.8768	0.937025
SCN4A	Healthy_ADM	-0.603695	0.130423	0.389059
SGCD	Healthy_ADM	-0.126003	0.283552	0.529026
SLC3A1	Healthy_ADM	0.646929	0.00159217	0.0522596
SLC5A1	Healthy_ADM	0.245221	0.582302	0.759177
SMN1	Healthy_ADM	-0.226561	0.00106157	0.0379352
SNCA	Healthy_ADM	-0.146112	0.0263945	0.216851
ABCA4	Healthy_ADM	-0.410846	0.0101589	0.146162
ABCC8	Healthy_ADM	0.357737	0.349967	0.588264
SERPINA7	Healthy_ADM	-0.429802	0.186112	0.443106
TCN2	Healthy_ADM	-0.340111	0.0352978	0.245868
TCOF1	Healthy_ADM	-0.488168	0.0225048	0.202227
TIMP3	Healthy_ADM	1.04826	0.00887967	0.136073
TPI1	Healthy_ADM	0.150465	0.237348	0.488625
TPM1	Healthy_ADM	1.10065	0.0177109	0.181702
TPMT	Healthy_ADM	-0.126681	0.36656	0.600113
TTR	Healthy_ADM	2.32717	0.0471365	0.271156
TYR	Healthy_ADM	-1.21086	0.133553	0.392454
UROS	Healthy_ADM	-0.130229	0.165813	0.424506
VDR	Healthy_ADM	-1.11253	0.561867	0.74414
WAS	Healthy_ADM	-0.565556	0.0345403	0.243113
SLC25A20	Healthy_ADM	-0.456351	0.0926136	0.346141
CASR	Healthy_ADM	-0.279489	0.457204	0.665535
CDKN1A	Healthy_ADM	0.399429	0.071333	0.317918
CHM	Healthy_ADM	-0.423083	0.117584	0.374233
TPP1	Healthy_ADM	0.173426	0.00192803	0.0585714
COL5A2	Healthy_ADM	-0.366751	0.385029	0.615773
CYB5R3	Healthy_ADM	0.382653	0.0944595	0.348341
G6PD	Healthy_ADM	-0.269181	0.110882	0.364821
GM2A	Healthy_ADM	0.0816976	0.25235	0.502671
HSD17B4	Healthy_ADM	-0.0470611	0.659148	0.809166
IFNGR1	Healthy_ADM	0.140377	0.191904	0.448963
IL4R	Healthy_ADM	-0.0557181	0.578848	0.757152
KRT17	Healthy_ADM	-0.119851	0.804637	0.897116
PAFAH1B1	Healthy_ADM	0.0273275	0.654657	0.805917
NEU1	Healthy_ADM	-0.205693	0.0423365	0.261356
NOTCH3	Healthy_ADM	0.159885	0.267182	0.514705
PLEC	Healthy_ADM	0.0955004	0.459359	0.667763
RAG1	Healthy_ADM	-0.342788	0.0191718	0.186463
STK11	Healthy_ADM	-0.0656175	0.336775	0.576782
BARD1	Healthy_ADM	-0.073124	0.417619	0.638648
PEX1	Healthy_ADM	0.0220034	0.810317	0.900137
NR0B1	Healthy_ADM	-0.12413	0.474992	0.679235
AK1	Healthy_ADM	0.00577487	0.933902	0.966873
ALB	Healthy_ADM	-0.102635	0.717548	0.842871
APP	Healthy_ADM	0.549979	0.0257577	0.215574
APRT	Healthy_ADM	-0.174148	0.0210782	0.195584
AQP2	Healthy_ADM	-0.339548	0.112792	0.367445
ARSA	Healthy_ADM	-0.0970514	0.22826	0.481395
ATRX	Healthy_ADM	-0.625728	0.0212297	0.196043
C1QB	Healthy_ADM	0.494081	0.0935354	0.347264
CFTR	Healthy_ADM	2.25523	0.00886436	0.136073
F12	Healthy_ADM	-0.20108	0.00686891	0.122585
FBP1	Healthy_ADM	0.00220258	0.98698	0.993862
FUT2	Healthy_ADM	-0.606361	0.0315631	0.235787
HEXA	Healthy_ADM	0.173891	0.0160474	0.17504
HEXB	Healthy_ADM	0.336919	0.122543	0.381596
LDLR	Healthy_ADM	-0.151644	0.338674	0.578358
TSC2	Healthy_ADM	-0.514667	0.0668967	0.307636
VHL	Healthy_ADM	0.0446626	0.565728	0.746948
VWF	Healthy_ADM	-0.0977386	0.29935	0.542686
FCGR3A	Healthy_ADM	0.0603273	0.458899	0.667466
CD55	Healthy_ADM	-0.450553	0.285383	0.530767
IL1RN	Healthy_ADM	-0.290863	0.0429911	0.261935
CCR5	Healthy_ADM	0.263455	0.176603	0.433635
GPX1	Healthy_ADM	-0.0219108	0.801691	0.895843
GC	Healthy_ADM	0.0488514	0.853914	0.92574
C7	Healthy_ADM	1.10981	0.00565364	0.110246
CD14	Healthy_ADM	0.0480409	0.649842	0.80269
TAP1	Healthy_ADM	-0.0500356	0.704913	0.83565
IGFBP1	Healthy_ADM	-0.107959	0.328436	0.568968
IGFBP2	Healthy_ADM	-0.220996	0.358335	0.594655
IGFBP3	Healthy_ADM	0.149762	0.441589	0.654967
SERPINE1	Healthy_ADM	0.261938	0.451528	0.66225
C8G	Healthy_ADM	-0.0237822	0.805923	0.897508
ORM2	Healthy_ADM	-0.164084	0.0604901	0.297605
CD59	Healthy_ADM	1.11503	0.0257091	0.215401
CD4	Healthy_ADM	0.201374	0.121677	0.380947
SLC11A2	Healthy_ADM	0.31146	0.0322532	0.238271
SERPINA5	Healthy_ADM	1.32369	1.35731e-15	3.46349e-12
LTBP1	Healthy_ADM	-0.012562	0.886142	0.941944
IL10RB	Healthy_ADM	-0.00617754	0.96418	0.980927
IFNAR1	Healthy_ADM	0.638894	0.00700792	0.12406
NCF4	Healthy_ADM	0.0914199	0.454971	0.663868
RFX2	Healthy_ADM	-0.0662729	0.500475	0.699373
SOD2	Healthy_ADM	0.825177	0.0843813	0.336794
GSR	Healthy_ADM	0.15003	0.230371	0.483987
VTN	Healthy_ADM	0.235613	0.209414	0.464234
FASLG	Healthy_ADM	0.0681851	0.53942	0.727847
TGFB1	Healthy_ADM	0.281835	0.00507482	0.10453
RPL9	Healthy_ADM	0.0894495	0.687078	0.825718
ACHE	Healthy_ADM	-0.755581	0.00590873	0.112214
ACY1	Healthy_ADM	-0.115577	0.212157	0.466504
ADH1A	Healthy_ADM	-0.0233808	0.925384	0.962814
ADH5	Healthy_ADM	0.0779887	0.440356	0.654169
ADH7	Healthy_ADM	0.102255	0.640633	0.795812
ADRA2A	Healthy_ADM	0.496352	0.145667	0.404655
ALDH1A1	Healthy_ADM	0.276524	0.232842	0.485426
ALDH2	Healthy_ADM	-0.260092	0.0911086	0.345899
ALDH3A1	Healthy_ADM	-0.721348	0.0034948	0.0852398
ALDH1B1	Healthy_ADM	0.244049	0.21842	0.471856
ALDH1A3	Healthy_ADM	0.35615	0.0125196	0.158726
ALDH3B2	Healthy_ADM	-0.212331	0.0881384	0.34244
ALDH9A1	Healthy_ADM	0.00326117	0.978328	0.988076
ALOX5	Healthy_ADM	0.103001	0.473748	0.678562
ANXA1	Healthy_ADM	0.204147	0.600489	0.769824
ATP1A1	Healthy_ADM	1.03629	1.07918e-05	0.00116779
BCKDHA	Healthy_ADM	-0.0820828	0.411079	0.634519
BLVRB	Healthy_ADM	0.0290171	0.783647	0.884856
TSPO	Healthy_ADM	-0.291878	0.168772	0.425981
C4BPB	Healthy_ADM	-0.0422918	0.612359	0.778675
CA4	Healthy_ADM	0.388881	0.0302133	0.230886
CACNA1D	Healthy_ADM	0.264455	0.177954	0.435003
CACNA2D1	Healthy_ADM	-0.00963992	0.952735	0.974361
CACNB3	Healthy_ADM	0.0199623	0.866852	0.931993
CHRM3	Healthy_ADM	-0.0513195	0.630342	0.790294
CHRNA3	Healthy_ADM	0.0146117	0.902972	0.948657
CHRNA5	Healthy_ADM	-0.0550606	0.50096	0.699922
CHRNB1	Healthy_ADM	0.152302	0.163156	0.42187
CRH	Healthy_ADM	0.0177989	0.876645	0.937025
CSF1	Healthy_ADM	0.565043	0.00170119	0.0537869
CYP2C19	Healthy_ADM	-0.147676	0.547249	0.734413
CYP2C9	Healthy_ADM	-0.38918	0.00805701	0.13229
CYP2C18	Healthy_ADM	-0.750797	0.052175	0.280126
CYP2F1	Healthy_ADM	0.0212884	0.86473	0.931545
CYP2J2	Healthy_ADM	0.00354096	0.976817	0.987615
CYP3A5	Healthy_ADM	0.450479	0.302562	0.54619
CYP4B1	Healthy_ADM	0.116618	0.706921	0.836481
DCK	Healthy_ADM	0.0398597	0.594948	0.766558
ACE	Healthy_ADM	0.0384191	0.823555	0.909126
DDC	Healthy_ADM	0.001411	0.989526	0.994965
DIO1	Healthy_ADM	-0.0811642	0.479356	0.682868
DRD5	Healthy_ADM	-0.305517	0.062543	0.300667
GAST	Healthy_ADM	-0.187252	0.0584008	0.294225
GABRA4	Healthy_ADM	0.0723149	0.573358	0.75274
GABRB1	Healthy_ADM	0.0222141	0.832251	0.914053
GABRB2	Healthy_ADM	0.143361	0.247467	0.49871
GABRB3	Healthy_ADM	0.109305	0.169646	0.427201
GART	Healthy_ADM	0.178601	0.161713	0.420024
GAS6	Healthy_ADM	0.533834	0.0107828	0.149809
GLRB	Healthy_ADM	0.144839	0.291471	0.536681
GRIA1	Healthy_ADM	0.0798824	0.574446	0.753409
GRIA4	Healthy_ADM	-0.0162546	0.887603	0.942676
GRIK3	Healthy_ADM	0.0140176	0.925469	0.962814
GRIN2A	Healthy_ADM	-0.338052	0.0062305	0.116469
GRINA	Healthy_ADM	0.240701	0.00853731	0.134289
GSTA2	Healthy_ADM	-0.0581955	0.629896	0.790201
GSTM2	Healthy_ADM	0.00889744	0.923209	0.961634
GSTM3	Healthy_ADM	0.0539897	0.733364	0.853832
GSTM4	Healthy_ADM	0.23386	0.238521	0.489466
GUCY1A2	Healthy_ADM	0.379283	0.0138931	0.164414
GUK1	Healthy_ADM	0.176627	0.106842	0.361797
HMGCR	Healthy_ADM	-0.105135	0.247223	0.498665
HPGD	Healthy_ADM	-1.08276	2.20011e-07	4.6954e-05
HTR2C	Healthy_ADM	-0.0434109	0.652143	0.804369
IFNAR2	Healthy_ADM	0.212068	0.0911232	0.345899
IGF1R	Healthy_ADM	0.159233	0.0787065	0.329759
IGF2R	Healthy_ADM	0.357507	0.0570703	0.292704
IMPDH1	Healthy_ADM	-0.0852887	0.316003	0.557916
IMPDH2	Healthy_ADM	0.0894263	0.52199	0.71462
ITGA4	Healthy_ADM	0.0426206	0.716073	0.841994
ITGAX	Healthy_ADM	0.115944	0.292233	0.536848
ITGB6	Healthy_ADM	-0.0422885	0.828135	0.911673
KCNJ5	Healthy_ADM	0.0339079	0.798839	0.89478
KLKB1	Healthy_ADM	0.235685	0.230842	0.484314
CYP4F3	Healthy_ADM	-0.226381	0.209841	0.464346
MAOB	Healthy_ADM	0.13074	0.578527	0.757081
NQO1	Healthy_ADM	-0.754985	0.129027	0.387232
NQO2	Healthy_ADM	0.176152	0.246845	0.498294
NPY1R	Healthy_ADM	0.128882	0.374427	0.606776
OPRD1	Healthy_ADM	-0.036452	0.627813	0.789441
P4HA1	Healthy_ADM	-0.0789482	0.420481	0.64099
P4HB	Healthy_ADM	-0.251658	0.250051	0.500608
PAM	Healthy_ADM	0.086276	0.483547	0.685947
PDE3A	Healthy_ADM	0.441636	2.33501e-05	0.00208603
PDE4C	Healthy_ADM	-0.188817	0.0187301	0.185923
PDE1B	Healthy_ADM	0.0492338	0.659472	0.809252
PDHB	Healthy_ADM	0.312497	0.0575822	0.293363
PGR	Healthy_ADM	0.0789152	0.39847	0.625934
ABCB1	Healthy_ADM	0.0625014	0.692179	0.82809
PLA2G1B	Healthy_ADM	-0.0761846	0.927182	0.963145
PLAT	Healthy_ADM	0.0272406	0.866492	0.931921
PNLIP	Healthy_ADM	-0.273105	0.758468	0.870008
POLR2A	Healthy_ADM	0.254124	0.0482795	0.272868
POLR2B	Healthy_ADM	0.464816	0.132281	0.391928
POMC	Healthy_ADM	0.033404	0.828733	0.911939
PON3	Healthy_ADM	-0.0525896	0.653563	0.804957
POR	Healthy_ADM	0.0104116	0.887801	0.942676
PPIB	Healthy_ADM	0.0990111	0.510847	0.706796
PPIC	Healthy_ADM	0.0987399	0.246168	0.497551
PPP3R1	Healthy_ADM	0.0171448	0.846357	0.921004
PRIM1	Healthy_ADM	0.0525786	0.70151	0.833029
PRL	Healthy_ADM	0.117604	0.443726	0.65648
PTGDR	Healthy_ADM	0.0329378	0.735448	0.85508
PTGDS	Healthy_ADM	0.342761	0.337072	0.577033
PTGER4	Healthy_ADM	-0.193924	0.116879	0.373691
PTGIS	Healthy_ADM	0.00121301	0.996568	0.998388
RARB	Healthy_ADM	0.115838	0.41134	0.634671
RPL4	Healthy_ADM	0.362522	0.0924952	0.346141
RPL5	Healthy_ADM	0.235964	0.305201	0.548692
RPL6	Healthy_ADM	0.348606	0.0765773	0.326824
RPL7	Healthy_ADM	-0.1348	0.3644	0.598909
RPL7A	Healthy_ADM	-0.0615364	0.734277	0.854289
RPL12	Healthy_ADM	-0.0790969	0.765337	0.874985
RPL23	Healthy_ADM	-0.0205943	0.894867	0.945483
RPL18A	Healthy_ADM	-0.0703907	0.71148	0.839419
RPL19	Healthy_ADM	-0.107584	0.568246	0.748857
RPL21	Healthy_ADM	0.0097247	0.950687	0.97383
RPL17	Healthy_ADM	0.132448	0.553226	0.738504
RPL24	Healthy_ADM	-0.166668	0.256872	0.505141
RPL26	Healthy_ADM	0.000402757	0.998663	0.999642
RPL27	Healthy_ADM	-0.0581606	0.713166	0.840505
RPL30	Healthy_ADM	-0.203691	0.254808	0.503835
RPL28	Healthy_ADM	-0.225599	0.209103	0.464234
RPL29	Healthy_ADM	-0.010869	0.958581	0.978058
RPL34	Healthy_ADM	-0.0295309	0.898383	0.946166
RPL35A	Healthy_ADM	-0.0437422	0.791784	0.889888
RPL37	Healthy_ADM	-0.154284	0.417852	0.638648
RPL37A	Healthy_ADM	-0.10474	0.526307	0.718099
RPL39	Healthy_ADM	-0.101629	0.646471	0.799298
RPL36AL	Healthy_ADM	-0.117136	0.253079	0.50308
SLC2A9	Healthy_ADM	0.0317516	0.715273	0.841826
PRSS58	Healthy_ADM	-0.625763	0.107769	0.362201
CD44	Healthy_ADM	0.807672	0.0144936	0.16745
TSR3	Healthy_ADM	0.0567288	0.562316	0.744302
ZNF429	Healthy_ADM	0.141085	0.316029	0.557916
STX16	Healthy_ADM	0.0193948	0.778643	0.881308
C16orf87	Healthy_ADM	0.0181391	0.833357	0.914277
UBE2W	Healthy_ADM	0.093837	0.368268	0.601106
NDUFV3	Healthy_ADM	0.227882	0.129587	0.388153
RORC	Healthy_ADM	-0.0647774	0.664863	0.812345
GRB10	Healthy_ADM	0.10661	0.314383	0.556493
GDF6	Healthy_ADM	0.121927	0.288796	0.533992
TIMM50	Healthy_ADM	-0.0611402	0.405244	0.630616
PDE9A	Healthy_ADM	0.0583158	0.472476	0.678003
ALKBH2	Healthy_ADM	0.270016	0.161402	0.419645
OR9A2	Healthy_ADM	-0.0939174	0.248959	0.499908
ETFRF1	Healthy_ADM	-0.0202872	0.793858	0.891697
SPOPL	Healthy_ADM	0.0996329	0.379698	0.61132
ANO7	Healthy_ADM	-0.122312	0.422517	0.642556
ZNF470	Healthy_ADM	0.000981233	0.992758	0.99704
ARHGEF37	Healthy_ADM	0.114888	0.259284	0.507596
SPATA31D1	Healthy_ADM	-0.0970489	0.357726	0.594279
C4orf3	Healthy_ADM	0.120192	0.184651	0.441816
FAM166A	Healthy_ADM	-0.114582	0.512927	0.707004
LCN10	Healthy_ADM	-0.00377775	0.976488	0.987615
CDY2B	Healthy_ADM	0.129383	0.402084	0.627957
ATP1B1	Healthy_ADM	0.212119	0.174916	0.432416
TOMM5	Healthy_ADM	-0.103367	0.322907	0.563968
C8orf82	Healthy_ADM	0.0106236	0.886557	0.941994
STX19	Healthy_ADM	0.115002	0.583222	0.760118
PIM3	Healthy_ADM	-0.0874339	0.359145	0.595059
TTC3	Healthy_ADM	0.201385	0.116222	0.372211
OR52J3	Healthy_ADM	-0.106324	0.178534	0.435315
OR56A1	Healthy_ADM	-0.152267	0.215672	0.469635
AFAP1L2	Healthy_ADM	-0.20773	0.0202887	0.191497
ATP5F1A	Healthy_ADM	0.647755	0.00441969	0.0951163
PLEKHA1	Healthy_ADM	0.2135	0.160629	0.418485
PAMR1	Healthy_ADM	0.16413	0.337839	0.577703
EXOSC10	Healthy_ADM	0.133856	0.0503528	0.277019
RPLP0	Healthy_ADM	-0.135895	0.494873	0.69577
GMPR2	Healthy_ADM	0.0724101	0.400786	0.62752
HCFC1R1	Healthy_ADM	0.155619	0.198772	0.455988
PFKL	Healthy_ADM	-0.0690391	0.376865	0.608544
CLDN18	Healthy_ADM	-1.11042	0.00742509	0.126771
ATP5MC1	Healthy_ADM	-0.0908787	0.217956	0.471856
C4B	Healthy_ADM	0.754575	0.0538077	0.283964
ECHDC1	Healthy_ADM	0.485236	0.0938645	0.347441
ATP5MC2	Healthy_ADM	-0.043626	0.862297	0.929959
AFTPH	Healthy_ADM	-0.0761239	0.292578	0.536998
SUMO4	Healthy_ADM	0.0949575	0.464118	0.671403
LCLAT1	Healthy_ADM	-0.154391	0.079633	0.330862
ATP5MC3	Healthy_ADM	0.220398	0.225316	0.478578
ZFYVE27	Healthy_ADM	0.133361	0.268265	0.515785
EPSTI1	Healthy_ADM	-0.0171123	0.866617	0.931921
EXOSC3	Healthy_ADM	-0.873102	0.273685	0.520734
SFR1	Healthy_ADM	0.270916	0.213408	0.467712
RAB11FIP1	Healthy_ADM	-0.111675	0.396316	0.624082
ZNF787	Healthy_ADM	0.0270014	0.673563	0.818826
ANXA2	Healthy_ADM	0.764235	0.000922249	0.0345641
THOC5	Healthy_ADM	0.17955	0.113357	0.368256
CBY1	Healthy_ADM	0.0920092	0.325594	0.566483
OR8G1	Healthy_ADM	-0.320582	0.00453908	0.0968716
GPR139	Healthy_ADM	0.166881	0.209683	0.464346
KCTD11	Healthy_ADM	-0.278494	0.320234	0.56224
ALKAL2	Healthy_ADM	0.98471	0.00370904	0.0881754
IGFL4	Healthy_ADM	0.0283186	0.853022	0.925412
RPLP1	Healthy_ADM	-0.462861	0.0335502	0.241128
BICD1	Healthy_ADM	-0.104216	0.174028	0.431447
SMAD2	Healthy_ADM	0.334202	0.0503704	0.277019
LDLRAD4	Healthy_ADM	-0.242096	0.0410847	0.258326
C11orf49	Healthy_ADM	-0.0171962	0.861554	0.929419
LEPR	Healthy_ADM	0.114844	0.341304	0.580484
HMGXB4	Healthy_ADM	0.163166	0.306657	0.550114
UQCR10	Healthy_ADM	0.125212	0.120411	0.378816
LY6G6F	Healthy_ADM	0.148376	0.248635	0.499806
ARHGEF35	Healthy_ADM	-0.243406	0.0229855	0.204396
ATP5PF	Healthy_ADM	0.122775	0.158414	0.41615
MTFP1	Healthy_ADM	-0.294701	0.000526995	0.0227923
OSBPL8	Healthy_ADM	-0.197774	0.187594	0.444257
GLE1	Healthy_ADM	-0.000675332	0.993659	0.997163
KLHL31	Healthy_ADM	0.110455	0.50224	0.701073
ERLIN2	Healthy_ADM	0.135068	0.273964	0.521048
RBMS3	Healthy_ADM	0.0571029	0.70775	0.837141
GTF2IRD2B	Healthy_ADM	0.111171	0.402494	0.627957
SLC6A19	Healthy_ADM	0.0365197	0.810392	0.900137
SP5	Healthy_ADM	-0.2152	0.0267331	0.218699
MED15	Healthy_ADM	0.0600336	0.499964	0.698913
MANBAL	Healthy_ADM	0.0238182	0.711336	0.839419
HBM	Healthy_ADM	-0.326465	0.144122	0.403339
BMF	Healthy_ADM	0.0266171	0.822762	0.908622
OGDH	Healthy_ADM	0.0513028	0.500219	0.699141
RPLP2	Healthy_ADM	-0.277677	0.193147	0.45053
NOMO3	Healthy_ADM	-0.103778	0.585018	0.761402
GRK6	Healthy_ADM	-0.00246701	0.978505	0.988076
QSOX1	Healthy_ADM	0.0651785	0.789651	0.888661
ZNF813	Healthy_ADM	0.164191	0.177081	0.43385
FIGLA	Healthy_ADM	0.0801655	0.541322	0.72916
TMEM220	Healthy_ADM	0.113252	0.213057	0.467423
LIN28B	Healthy_ADM	0.0784448	0.45497	0.663868
ZNF705A	Healthy_ADM	-0.259999	0.206057	0.461555
RNASEK	Healthy_ADM	0.149918	0.483013	0.685569
SPDYE3	Healthy_ADM	-0.181199	0.0884159	0.34308
FGFRL1	Healthy_ADM	-0.11769	0.203145	0.459397
DPP10	Healthy_ADM	0.0649167	0.657425	0.808159
CLEC2D	Healthy_ADM	0.0733001	0.442275	0.65565
METRNL	Healthy_ADM	-0.543259	0.134217	0.392546
SLC30A2	Healthy_ADM	-0.0714407	0.616372	0.781321
OR1S2	Healthy_ADM	-0.0856368	0.347217	0.585767
OR10A6	Healthy_ADM	0.158938	0.313186	0.555321
OR10G4	Healthy_ADM	-0.167645	0.0635646	0.303298
ST8SIA6	Healthy_ADM	-0.0232025	0.878575	0.937298
OR13C8	Healthy_ADM	-0.170805	0.0157183	0.174995
OR2A25	Healthy_ADM	0.249727	0.341304	0.580484
OR2L2	Healthy_ADM	-0.0103416	0.950635	0.97383
OR2M2	Healthy_ADM	-0.27329	0.0277893	0.222865
OR2T12	Healthy_ADM	-0.0149426	0.898107	0.946166
OR4C3	Healthy_ADM	0.123605	0.467699	0.674803
OR4M2	Healthy_ADM	-0.162268	0.0622895	0.300667
NCK2	Healthy_ADM	0.386856	0.0139741	0.164414
OR4X1	Healthy_ADM	0.0426761	0.679682	0.822485
OR5L1	Healthy_ADM	-0.334666	0.0424793	0.261356
OR5M3	Healthy_ADM	0.0466627	0.628031	0.789457
RPS3	Healthy_ADM	-0.175873	0.280923	0.526679
SFMBT1	Healthy_ADM	0.00699603	0.951677	0.974248
OR52N2	Healthy_ADM	0.108727	0.419692	0.640415
OR56A4	Healthy_ADM	-0.0997399	0.366118	0.600113
OR6C1	Healthy_ADM	-0.153568	0.032898	0.239149
OR7A10	Healthy_ADM	-0.0173808	0.879149	0.937344
OR8B12	Healthy_ADM	0.00600762	0.961125	0.979094
LRRC52	Healthy_ADM	0.1214	0.28239	0.527756
FRG2	Healthy_ADM	-0.168648	0.0264763	0.217095
PKP2	Healthy_ADM	0.0637507	0.393736	0.622209
CHD3	Healthy_ADM	0.334396	0.0368848	0.250341
OR4A16	Healthy_ADM	0.158734	0.148945	0.406952
SREBF1	Healthy_ADM	-0.153282	0.359981	0.595778
OR4F6	Healthy_ADM	-0.0138447	0.911699	0.954173
HNRNPL	Healthy_ADM	0.0987411	0.0608097	0.29834
RGS10	Healthy_ADM	-0.178154	0.186245	0.443106
AK4	Healthy_ADM	-0.117932	0.585248	0.761402
KDM2B	Healthy_ADM	0.0798114	0.364795	0.599
ZNF32	Healthy_ADM	-0.0510223	0.671304	0.817496
MTIF2	Healthy_ADM	-0.734366	0.0393767	0.257473
LRSAM1	Healthy_ADM	0.0953324	0.320629	0.562289
DAZ4	Healthy_ADM	-1.00145	0.00280817	0.074397
ACTR2	Healthy_ADM	0.0834953	0.292058	0.536848
SF3A1	Healthy_ADM	0.20526	0.170804	0.428084
MARCHF2	Healthy_ADM	0.00431067	0.959673	0.978522
B4GALT2	Healthy_ADM	0.0494287	0.688446	0.826362
OR10G3	Healthy_ADM	-0.272925	0.0402558	0.257953
NFKBIZ	Healthy_ADM	-0.187915	0.406272	0.630966
OR4K15	Healthy_ADM	0.0153014	0.933774	0.966872
CPM	Healthy_ADM	-0.0230556	0.937207	0.967688
OR11G2	Healthy_ADM	-0.0758333	0.36123	0.596623
OR4F21	Healthy_ADM	-0.0695033	0.324641	0.565454
CACNA2D2	Healthy_ADM	0.257781	0.525664	0.717349
OR4A47	Healthy_ADM	-0.0190757	0.838603	0.91689
OR5H14	Healthy_ADM	0.078617	0.624629	0.78737
SF3B1	Healthy_ADM	0.0560517	0.253721	0.503335
EDA	Healthy_ADM	0.425628	0.110548	0.364595
ITGB4	Healthy_ADM	-0.209741	0.364535	0.598909
CHEK2	Healthy_ADM	0.190246	0.277789	0.524708
CACNA2D4	Healthy_ADM	0.17688	0.462363	0.670038
VPS54	Healthy_ADM	0.0491551	0.531326	0.721248
GBA	Healthy_ADM	0.101585	0.182841	0.440091
NUMB	Healthy_ADM	0.00625547	0.930885	0.964758
WASHC2A	Healthy_ADM	0.06277	0.527575	0.719191
HAO2	Healthy_ADM	-0.158018	0.0377972	0.252299
ADAM9	Healthy_ADM	-0.0085238	0.946979	0.971762
ZNF835	Healthy_ADM	-0.00697692	0.94994	0.973378
ZNF780B	Healthy_ADM	-0.181923	0.223636	0.476879
ATP8B2	Healthy_ADM	0.0500245	0.530817	0.721193
ERBB2	Healthy_ADM	-0.123022	0.234172	0.48576
IP6K2	Healthy_ADM	-0.0528104	0.577257	0.755677
ERBB3	Healthy_ADM	-0.418606	8.33205e-06	0.00100024
KRTAP5-1	Healthy_ADM	-0.320713	0.244852	0.496489
RPS3A	Healthy_ADM	0.0406647	0.841699	0.919359
DIPK1A	Healthy_ADM	0.181003	0.211875	0.466504
LRRC37A2	Healthy_ADM	0.0528552	0.489959	0.69185
TCEAL9	Healthy_ADM	0.371717	0.0772505	0.327728
MAPKAP1	Healthy_ADM	0.100682	0.386413	0.616319
ARHGAP17	Healthy_ADM	0.212299	0.0961418	0.349156
RAB37	Healthy_ADM	-0.0241574	0.828425	0.911785
SLC25A25	Healthy_ADM	-0.0851511	0.402441	0.627957
CR2	Healthy_ADM	-0.246463	0.0017962	0.0560985
SPIN2B	Healthy_ADM	-0.061669	0.464827	0.672175
TCEAL4	Healthy_ADM	0.321838	0.185406	0.44252
TCEAL6	Healthy_ADM	0.165288	0.185899	0.443106
LRRC18	Healthy_ADM	-0.190986	0.0231084	0.204541
ALG3	Healthy_ADM	0.0295326	0.757808	0.869442
LRIF1	Healthy_ADM	0.0600848	0.585707	0.761676
UHRF1BP1L	Healthy_ADM	0.0155463	0.899909	0.946695
RPS4X	Healthy_ADM	0.0669685	0.804316	0.897032
ATN1	Healthy_ADM	0.269731	2.83579e-06	0.00040347
CLEC6A	Healthy_ADM	-0.133479	0.345916	0.584747
SDCBP	Healthy_ADM	0.15083	0.411783	0.635032
KLHL5	Healthy_ADM	0.507102	0.0051136	0.104767
RESP18	Healthy_ADM	0.00749167	0.940702	0.969471
C8orf48	Healthy_ADM	-0.0123249	0.915366	0.956707
NTRK2	Healthy_ADM	0.526055	0.0325086	0.238748
SCP2	Healthy_ADM	0.0765909	0.510368	0.706514
ZNF484	Healthy_ADM	0.120153	0.251127	0.501456
FSD2	Healthy_ADM	0.041998	0.696508	0.831068
ZNF483	Healthy_ADM	0.0338378	0.658017	0.808499
IGIP	Healthy_ADM	-0.00486165	0.951561	0.974248
IGF2BP2	Healthy_ADM	-0.103573	0.148346	0.406257
SPOP	Healthy_ADM	0.0154626	0.888315	0.94293
CARD17	Healthy_ADM	0.208295	0.272902	0.520077
STAR	Healthy_ADM	0.127132	0.432468	0.648803
BRWD1	Healthy_ADM	-0.196016	0.110219	0.364534
ZNF599	Healthy_ADM	0.0945326	0.454259	0.663868
ERV3-1	Healthy_ADM	-1.12783	0.110513	0.364595
SETD4	Healthy_ADM	0.12283	0.328333	0.568918
GEMIN7	Healthy_ADM	-0.0355439	0.692277	0.82809
EI24	Healthy_ADM	0.0111044	0.869437	0.932814
RASL10A	Healthy_ADM	0.0312231	0.765759	0.875002
RWDD1	Healthy_ADM	0.0698231	0.571411	0.751323
TULP4	Healthy_ADM	-0.191041	0.101819	0.356393
HCST	Healthy_ADM	-0.133204	0.0316795	0.235787
NWD1	Healthy_ADM	-0.070891	0.74066	0.857877
LMBRD2	Healthy_ADM	0.106076	0.561366	0.743745
NKAPL	Healthy_ADM	0.0890805	0.438817	0.653251
STH	Healthy_ADM	0.347093	0.362263	0.596908
SS18	Healthy_ADM	-0.0222087	0.691354	0.827621
IRGQ	Healthy_ADM	0.120797	0.132713	0.391928
IGFBPL1	Healthy_ADM	-1.638	0.0751295	0.326166
TFG	Healthy_ADM	0.0762261	0.291498	0.536681
C2CD4B	Healthy_ADM	-0.672583	0.029732	0.229688
RPS4Y1	Healthy_ADM	-0.16367	0.158217	0.41615
OPTN	Healthy_ADM	0.253597	0.0112806	0.153075
COA5	Healthy_ADM	-0.0519706	0.590266	0.763856
C1QL4	Healthy_ADM	-0.122925	0.383755	0.614854
SAXO2	Healthy_ADM	-0.157396	0.033105	0.239497
C18orf25	Healthy_ADM	-0.207911	0.221589	0.474755
TAGLN3	Healthy_ADM	0.0658481	0.395911	0.624082
TRIM72	Healthy_ADM	-0.259423	0.0287314	0.226324
CISD2	Healthy_ADM	-0.109364	0.256625	0.505033
UMOD	Healthy_ADM	-0.168278	0.0305757	0.231442
CCDC73	Healthy_ADM	0.208402	0.176915	0.433845
C4orf46	Healthy_ADM	-0.345293	0.0917816	0.346141
LAMTOR4	Healthy_ADM	-0.0449206	0.470462	0.67667
WDHD1	Healthy_ADM	-0.0379138	0.615657	0.780802
ZNF761	Healthy_ADM	0.157092	0.0146028	0.168162
BCAP29	Healthy_ADM	0.212291	0.0889925	0.343856
TTLL9	Healthy_ADM	0.27997	0.300934	0.544421
STEAP3	Healthy_ADM	-0.416172	0.0871354	0.340821
SLC41A3	Healthy_ADM	0.133122	0.188602	0.444891
KLF6	Healthy_ADM	-0.499308	0.237692	0.488808
SEPTIN2	Healthy_ADM	0.0622219	0.388291	0.617841
TMEM64	Healthy_ADM	-0.033369	0.799982	0.895169
PIWIL3	Healthy_ADM	0.0689221	0.51189	0.707004
LGMN	Healthy_ADM	-0.333002	0.0990618	0.351869
NEXMIF	Healthy_ADM	0.0313655	0.864317	0.931379
SLC7A2	Healthy_ADM	0.396641	0.0317341	0.235787
MXI1	Healthy_ADM	-0.122277	0.0457839	0.267496
TPST2	Healthy_ADM	-0.338985	0.24739	0.49871
KYAT3	Healthy_ADM	0.106895	0.361686	0.5967
CST9	Healthy_ADM	0.176066	0.298027	0.541992
THAP7	Healthy_ADM	-0.00960892	0.941362	0.969471
TFIP11	Healthy_ADM	0.0949153	0.241676	0.492651
ADGRL1	Healthy_ADM	-0.248428	0.108002	0.362201
RBPMS	Healthy_ADM	0.593657	2.926e-06	0.000408132
WDR89	Healthy_ADM	0.0946431	0.309881	0.55202
ZNF121	Healthy_ADM	0.274305	0.388701	0.617911
FNIP1	Healthy_ADM	-0.0435725	0.512278	0.707004
C6orf226	Healthy_ADM	-0.0873274	0.296985	0.541191
TMCO2	Healthy_ADM	0.0435369	0.787501	0.887021
SULT1C3	Healthy_ADM	-0.0673003	0.62996	0.790201
TDP1	Healthy_ADM	0.0263576	0.790353	0.889117
RAB19	Healthy_ADM	0.00851732	0.944101	0.970366
FBXO47	Healthy_ADM	-0.0979509	0.265937	0.513981
FAT3	Healthy_ADM	-0.52842	0.179897	0.436378
SLC35D3	Healthy_ADM	0.120172	0.386006	0.616106
CD200R1L	Healthy_ADM	-0.064974	0.866544	0.931921
CCT3	Healthy_ADM	-0.0510606	0.52426	0.716197
DSP	Healthy_ADM	-0.235733	0.312384	0.554156
NIPA2	Healthy_ADM	-0.0988861	0.242026	0.49271
TCP1	Healthy_ADM	0.265254	0.0501942	0.277019
ITPRIPL1	Healthy_ADM	-0.0346882	0.739494	0.85759
STATH	Healthy_ADM	-0.00357916	0.971078	0.984854
ACSL6	Healthy_ADM	-0.0508713	0.630804	0.790485
PPP2CB	Healthy_ADM	0.271541	0.0838108	0.336661
SH3D19	Healthy_ADM	0.118974	0.237557	0.488808
SLCO1B7	Healthy_ADM	0.00114124	0.989991	0.995185
CLSTN1	Healthy_ADM	-0.140317	0.255165	0.504096
SMPDL3B	Healthy_ADM	0.110755	0.486018	0.687928
CADPS2	Healthy_ADM	0.306061	0.203203	0.459397
ARMCX6	Healthy_ADM	0.0446269	0.640882	0.795914
SLX4IP	Healthy_ADM	-0.0881753	0.532657	0.72202
SPANXN3	Healthy_ADM	-0.226026	0.158134	0.41615
C20orf202	Healthy_ADM	-0.244028	0.00568864	0.110368
SPANXN1	Healthy_ADM	-0.0235495	0.806785	0.898208
CEP131	Healthy_ADM	-0.0748044	0.435681	0.650726
BRD9	Healthy_ADM	0.0580155	0.615534	0.780802
KIAA0930	Healthy_ADM	0.0846583	0.3029	0.546415
C12orf29	Healthy_ADM	0.17123	0.187637	0.444257
B3GNTL1	Healthy_ADM	-0.0189504	0.783573	0.884856
LUZP2	Healthy_ADM	-0.0792051	0.633213	0.791697
TMEM230	Healthy_ADM	-0.0607531	0.228138	0.481395
HRNR	Healthy_ADM	-0.0843099	0.205752	0.461218
DNASE1L1	Healthy_ADM	-0.112036	0.0987693	0.351568
ANKRD16	Healthy_ADM	0.0181386	0.855354	0.926449
PKD1	Healthy_ADM	0.238775	0.0963043	0.349156
SSBP3	Healthy_ADM	-0.0639885	0.616954	0.781671
ERMN	Healthy_ADM	0.0904643	0.644924	0.798799
DNAAF9	Healthy_ADM	0.191005	0.0348506	0.244186
SYTL3	Healthy_ADM	-0.126837	0.330208	0.570495
ZNF648	Healthy_ADM	-0.0585466	0.545965	0.733202
FAM168B	Healthy_ADM	0.196719	0.10319	0.357969
SSBP4	Healthy_ADM	0.0811929	0.249572	0.500246
RPS6	Healthy_ADM	-0.146481	0.541411	0.72916
ACSM2A	Healthy_ADM	-0.057647	0.556466	0.740274
SHE	Healthy_ADM	0.155165	0.478326	0.682058
LRRC38	Healthy_ADM	0.0542791	0.606425	0.775228
NRG3	Healthy_ADM	-0.0976733	0.223091	0.476113
ZNF766	Healthy_ADM	0.0432913	0.699068	0.831702
CLVS2	Healthy_ADM	-0.130494	0.124363	0.3826
LELP1	Healthy_ADM	-0.0659584	0.513458	0.707224
SPIN3	Healthy_ADM	-0.327767	0.100731	0.355497
TMEM273	Healthy_ADM	0.0827857	0.541395	0.72916
IBA57	Healthy_ADM	0.0940894	0.466788	0.673616
C6orf163	Healthy_ADM	0.0253832	0.846859	0.921004
TDRD6	Healthy_ADM	0.241796	0.277157	0.524094
FAM83B	Healthy_ADM	0.0905284	0.589815	0.763856
TECRL	Healthy_ADM	-0.0549589	0.620042	0.783904
TMEM244	Healthy_ADM	-0.147052	0.200206	0.457303
ZIK1	Healthy_ADM	-0.127907	0.335648	0.576051
CLPSL1	Healthy_ADM	-0.22189	0.21551	0.469591
ACER2	Healthy_ADM	-0.232576	0.249011	0.499908
ZC3H12B	Healthy_ADM	0.22318	0.361276	0.596623
PRAMEF6	Healthy_ADM	-0.0892511	0.256011	0.50454
MTX3	Healthy_ADM	-0.0154273	0.927263	0.963145
SLC10A5	Healthy_ADM	-0.0086252	0.93564	0.96763
ERCC6L2	Healthy_ADM	0.299151	0.225309	0.478578
SERP2	Healthy_ADM	-0.0593294	0.569791	0.75025
BNIP5	Healthy_ADM	0.0457582	0.710109	0.838446
GLYATL3	Healthy_ADM	-0.0536918	0.688568	0.826362
MUC21	Healthy_ADM	-0.189263	0.0305615	0.231442
C10orf120	Healthy_ADM	0.135668	0.356505	0.593762
HACD4	Healthy_ADM	-0.00999736	0.936731	0.967671
GOLGA7B	Healthy_ADM	0.193783	0.16643	0.424697
CALHM6	Healthy_ADM	0.0339822	0.737112	0.855767
BCL2L15	Healthy_ADM	-0.122564	0.162949	0.421669
THEMIS	Healthy_ADM	0.0563095	0.754401	0.866857
FAM171A1	Healthy_ADM	0.306099	0.0751418	0.326166
RAP1A	Healthy_ADM	-0.0811627	0.235015	0.486559
LIPJ	Healthy_ADM	0.114366	0.261804	0.510518
C9orf135	Healthy_ADM	-0.0297372	0.773224	0.879217
RAP1B	Healthy_ADM	0.230682	0.0817216	0.333972
CYP4A22	Healthy_ADM	-0.284174	0.198823	0.455988
SAMD13	Healthy_ADM	0.122373	0.382135	0.613829
BCAS4	Healthy_ADM	-0.845754	0.167182	0.42508
METTL21C	Healthy_ADM	-0.0339531	0.774314	0.879217
LDLRAD1	Healthy_ADM	0.108082	0.375894	0.607833
NCMAP	Healthy_ADM	0.573586	0.00913674	0.137913
AFMID	Healthy_ADM	-0.0670084	0.402245	0.627957
IFIT1B	Healthy_ADM	-0.0875465	0.505819	0.702771
HERPUD1	Healthy_ADM	0.0157442	0.91051	0.953372
FYTTD1	Healthy_ADM	0.185921	0.135602	0.393738
MAGEA10	Healthy_ADM	0.118395	0.641501	0.796228
SLC5A9	Healthy_ADM	0.170103	0.15599	0.41398
MAGEA4	Healthy_ADM	-0.284399	0.00645672	0.118962
C1GALT1C1	Healthy_ADM	0.0359936	0.668577	0.815475
SLC9A4	Healthy_ADM	0.00474891	0.984009	0.991884
HAUS8	Healthy_ADM	-0.114305	0.0901303	0.344767
MCCD1	Healthy_ADM	0.17364	0.335018	0.575569
OLA1	Healthy_ADM	0.180432	0.0892634	0.343856
PNLIPRP3	Healthy_ADM	-0.135659	0.166588	0.424697
NAA30	Healthy_ADM	0.105592	0.366375	0.600113
DEFB121	Healthy_ADM	-0.197901	0.0106141	0.14854
CLEC18B	Healthy_ADM	0.174374	0.22695	0.479973
BTBD1	Healthy_ADM	-0.0209229	0.749864	0.864146
RPS8	Healthy_ADM	0.0111144	0.952257	0.974323
MSL1	Healthy_ADM	0.345705	0.0518466	0.278994
RNASE13	Healthy_ADM	0.0258696	0.886237	0.941944
PRAMEF8	Healthy_ADM	-0.0254291	0.782674	0.884176
MCRS1	Healthy_ADM	0.0193029	0.804041	0.897032
ARSI	Healthy_ADM	0.00630793	0.945388	0.971109
ANO9	Healthy_ADM	-0.174032	0.0338006	0.242291
NTRK3	Healthy_ADM	0.0680227	0.481841	0.684412
DNAJC21	Healthy_ADM	0.269652	0.227217	0.48025
WDR31	Healthy_ADM	0.212054	0.192396	0.449294
OPCML	Healthy_ADM	-0.085447	0.308329	0.55106
TRIM61	Healthy_ADM	0.00425822	0.972215	0.985295
SOHLH1	Healthy_ADM	-0.0266708	0.777401	0.881209
KRTAP5-6	Healthy_ADM	0.167911	0.431968	0.648636
MYLK4	Healthy_ADM	-0.233928	0.0155728	0.174327
FOXP4	Healthy_ADM	-0.198071	0.123313	0.381832
FAM71F2	Healthy_ADM	-0.0745768	0.340737	0.579947
ZSCAN23	Healthy_ADM	0.0941483	0.433955	0.649767
SEC61G	Healthy_ADM	-0.0271265	0.799519	0.895169
KRTAP5-7	Healthy_ADM	0.0668588	0.608742	0.776417
SPRN	Healthy_ADM	0.231362	0.174689	0.43239
SLC45A2	Healthy_ADM	-0.0189614	0.8442	0.92041
GRP	Healthy_ADM	-0.146094	0.0761696	0.326824
ITM2C	Healthy_ADM	0.295096	0.000123861	0.00806463
MYPOP	Healthy_ADM	0.0680549	0.548874	0.735599
DYNC2LI1	Healthy_ADM	-0.0339154	0.659192	0.809166
KRTAP5-3	Healthy_ADM	-0.00734649	0.923563	0.961743
DCTD	Healthy_ADM	0.273882	0.081986	0.334307
ABI1	Healthy_ADM	-0.0291806	0.712556	0.840128
NHLRC3	Healthy_ADM	0.106066	0.364734	0.599
ZNF260	Healthy_ADM	0.189926	0.17432	0.431893
CTU2	Healthy_ADM	-0.237391	0.15528	0.413912
RGMB	Healthy_ADM	-0.158516	0.103404	0.357969
DDX60L	Healthy_ADM	-0.0279529	0.835631	0.915475
ADAL	Healthy_ADM	-0.0883239	0.331865	0.57287
RNASE10	Healthy_ADM	-0.0051177	0.962507	0.980111
PABPC1L2A	Healthy_ADM	0.0228993	0.875823	0.936605
TCEAL5	Healthy_ADM	-0.267769	0.0759246	0.326824
SATL1	Healthy_ADM	-0.0857488	0.315187	0.557285
ZKSCAN2	Healthy_ADM	-0.0342156	0.696956	0.83109
C16orf86	Healthy_ADM	-0.107701	0.309999	0.55202
C9orf152	Healthy_ADM	-0.308507	5.38408e-05	0.00418804
RPS9	Healthy_ADM	-0.036213	0.846175	0.921004
MPST	Healthy_ADM	-0.300048	0.000179432	0.0102879
SEH1L	Healthy_ADM	0.115918	0.218182	0.471856
EPGN	Healthy_ADM	0.0289945	0.801025	0.895558
AWAT1	Healthy_ADM	-0.0271708	0.832419	0.914053
LURAP1	Healthy_ADM	0.259484	0.172474	0.430094
HYKK	Healthy_ADM	-0.0401509	0.761836	0.872308
FAM53A	Healthy_ADM	0.0762546	0.555558	0.73962
ZC2HC1B	Healthy_ADM	0.150633	0.307244	0.550114
CFAP126	Healthy_ADM	-0.215972	0.123432	0.381832
DCAF12L2	Healthy_ADM	-0.120915	0.0915971	0.346141
AADACL4	Healthy_ADM	0.0337323	0.756228	0.868475
CCDC184	Healthy_ADM	-0.262327	0.163618	0.421979
TMEM82	Healthy_ADM	0.0105441	0.923939	0.962004
TRNP1	Healthy_ADM	-0.304456	0.250456	0.500847
FAM209B	Healthy_ADM	0.265904	0.209489	0.464234
FAM227A	Healthy_ADM	0.0523068	0.60858	0.776417
PRR23B	Healthy_ADM	-0.067792	0.5357	0.72461
ZNF793	Healthy_ADM	0.0626258	0.501437	0.700207
FRRS1	Healthy_ADM	-0.399551	0.126856	0.384424
VSIG8	Healthy_ADM	-0.148185	0.0302319	0.230886
PTRHD1	Healthy_ADM	0.463081	0.303764	0.547311
C17orf97	Healthy_ADM	0.0776569	0.593715	0.765483
FIGNL2	Healthy_ADM	0.0229837	0.85744	0.926994
SMCO3	Healthy_ADM	-0.173659	0.426352	0.645347
PLIN5	Healthy_ADM	-0.090491	0.336149	0.576074
CARMIL2	Healthy_ADM	-0.143729	0.0792605	0.330596
SLTM	Healthy_ADM	-0.225206	0.0899837	0.344767
RPS10	Healthy_ADM	-0.0989583	0.51923	0.712238
AKT1	Healthy_ADM	-0.0801392	0.134196	0.392546
CUTA	Healthy_ADM	-0.059488	0.533978	0.723172
ODF3B	Healthy_ADM	-0.0937439	0.486518	0.688383
ETFB	Healthy_ADM	-0.0770815	0.523737	0.716061
TM9SF1	Healthy_ADM	0.0204097	0.865197	0.931909
CFH	Healthy_ADM	0.189835	0.406981	0.631301
LAT	Healthy_ADM	-0.119109	0.415371	0.63724
SLX1A	Healthy_ADM	-0.16164	0.109141	0.362944
CKMT1A	Healthy_ADM	-0.564863	0.0383086	0.25474
LLGL2	Healthy_ADM	-0.121068	0.0927003	0.346141
MPG	Healthy_ADM	-0.216751	0.0326137	0.238837
RTKN	Healthy_ADM	0.0322342	0.733246	0.853823
RPS12	Healthy_ADM	0.0413075	0.863926	0.931193
RPS13	Healthy_ADM	0.197688	0.341558	0.580701
MSMO1	Healthy_ADM	0.101831	0.630677	0.790456
SUGP2	Healthy_ADM	0.113388	0.0961623	0.349156
MAEA	Healthy_ADM	-0.0160107	0.778539	0.881308
ESCO2	Healthy_ADM	-0.17986	0.0622026	0.300667
DNTT	Healthy_ADM	-0.0131692	0.926534	0.963121
ARHGAP8	Healthy_ADM	0.0899808	0.285254	0.530656
OS9	Healthy_ADM	0.033392	0.69767	0.83159
HSP90AA1	Healthy_ADM	0.0799877	0.547649	0.734565
TMEM30B	Healthy_ADM	-0.106702	0.402528	0.627957
SH3PXD2B	Healthy_ADM	-0.0448984	0.705594	0.836137
GNG10	Healthy_ADM	0.130674	0.0602529	0.29759
RPS15	Healthy_ADM	-0.0874018	0.631253	0.790754
SORBS3	Healthy_ADM	0.691858	0.038971	0.256567
MUC1	Healthy_ADM	-0.950096	0.102847	0.357868
SERBP1	Healthy_ADM	-0.0533149	0.487409	0.689262
FPGS	Healthy_ADM	0.122959	0.0924004	0.346141
VPS13C	Healthy_ADM	0.201496	0.114884	0.371077
ICE2	Healthy_ADM	-0.127991	0.0915723	0.346141
RPS16	Healthy_ADM	-0.0722456	0.640937	0.795914
PUM1	Healthy_ADM	0.118302	0.139318	0.397615
MYADM	Healthy_ADM	0.306983	0.150498	0.408866
RPS17	Healthy_ADM	-0.0466615	0.823573	0.909126
RPS19	Healthy_ADM	-0.814886	0.0550752	0.287076
GOLGA8A	Healthy_ADM	-0.595099	0.0151708	0.171833
IQCB1	Healthy_ADM	-0.0163775	0.805169	0.897351
RPS21	Healthy_ADM	-0.237998	0.150222	0.408733
HNMT	Healthy_ADM	0.282975	0.181477	0.43818
S100A13	Healthy_ADM	0.344133	0.0695972	0.313984
FBLIM1	Healthy_ADM	-0.0850928	0.466294	0.673138
ARF1	Healthy_ADM	0.0883041	0.516957	0.709949
KALRN	Healthy_ADM	-0.331711	0.0713269	0.317918
CD276	Healthy_ADM	0.0376082	0.843847	0.920267
TGFBR2	Healthy_ADM	0.00922432	0.91837	0.958413
MINK1	Healthy_ADM	-0.0488998	0.630514	0.79038
YIPF5	Healthy_ADM	-0.292095	0.00854711	0.134289
FNBP1L	Healthy_ADM	0.100396	0.208196	0.463378
SC5D	Healthy_ADM	-0.142591	0.292284	0.536848
RPS14	Healthy_ADM	-0.205428	0.296941	0.541191
CELF4	Healthy_ADM	-0.0439588	0.68785	0.826163
CTRB2	Healthy_ADM	0.168267	0.865726	0.931921
U2AF1	Healthy_ADM	0.012806	0.831173	0.913316
DUT	Healthy_ADM	0.0575741	0.462954	0.670501
RAB12	Healthy_ADM	0.0879119	0.186172	0.443106
VEGFA	Healthy_ADM	0.17153	0.0622478	0.300667
SPAG16	Healthy_ADM	-0.115743	0.248405	0.499521
SCGB2B2	Healthy_ADM	-0.172705	0.0510181	0.278184
ARFIP1	Healthy_ADM	-0.0603731	0.571101	0.751201
RPS24	Healthy_ADM	-0.157308	0.384102	0.614905
RPS25	Healthy_ADM	0.0601016	0.766025	0.875002
RPS26	Healthy_ADM	-0.046418	0.821788	0.907938
AHDC1	Healthy_ADM	0.479839	9.45843e-05	0.00672862
PCARE	Healthy_ADM	0.0786256	0.573733	0.75274
CPTP	Healthy_ADM	-0.139456	0.0798097	0.330911
METTL17	Healthy_ADM	0.0579013	0.543472	0.731071
RPS27	Healthy_ADM	0.0599001	0.764372	0.874353
AP2B1	Healthy_ADM	-0.0444935	0.629601	0.790022
AP1G1	Healthy_ADM	0.099175	0.243155	0.494222
ARHGAP5	Healthy_ADM	0.23813	0.00458968	0.0973438
PLPP4	Healthy_ADM	-0.353835	0.00219963	0.0628243
RPS28	Healthy_ADM	-0.170186	0.483767	0.686133
ZNF451	Healthy_ADM	0.0739612	0.461921	0.669863
SRSF7	Healthy_ADM	0.00710161	0.907766	0.951872
SCMH1	Healthy_ADM	0.0269173	0.717165	0.842871
PLD3	Healthy_ADM	0.162943	0.207094	0.462622
GASK1B	Healthy_ADM	0.0697559	0.421828	0.642208
ERGIC1	Healthy_ADM	0.00389807	0.953504	0.97482
CRELD1	Healthy_ADM	-0.0526517	0.572102	0.751538
DHRS12	Healthy_ADM	-0.00454882	0.968867	0.984026
DDX59	Healthy_ADM	0.0117556	0.882665	0.939529
ALDH3A2	Healthy_ADM	0.556353	0.0210728	0.195584
CSNK1G3	Healthy_ADM	-0.0360934	0.673561	0.818826
SERPINB8	Healthy_ADM	0.0399131	0.712736	0.840128
RPS29	Healthy_ADM	-0.391122	0.0461728	0.268747
TFPI	Healthy_ADM	0.21912	0.429264	0.647261
TMPO	Healthy_ADM	-0.107587	0.179617	0.436293
STK24	Healthy_ADM	-0.116409	0.155966	0.41398
SPINT1	Healthy_ADM	0.3868	0.00103689	0.0374011
RHOBTB1	Healthy_ADM	-0.154265	0.360041	0.595778
ADGRG6	Healthy_ADM	-0.169031	0.535322	0.724401
OAS1	Healthy_ADM	-0.134877	0.266238	0.514076
USP16	Healthy_ADM	0.111444	0.367943	0.60083
FBXO7	Healthy_ADM	0.0967209	0.210463	0.465052
GLUL	Healthy_ADM	0.292475	0.188799	0.4449
NGRN	Healthy_ADM	0.0114264	0.90221	0.948356
PAIP2	Healthy_ADM	0.157323	0.0192457	0.186463
SAR1B	Healthy_ADM	0.00403898	0.972689	0.985646
TMEM98	Healthy_ADM	0.0898693	0.591983	0.76479
CSTF3	Healthy_ADM	-0.0371213	0.649644	0.802576
PPM1B	Healthy_ADM	0.114632	0.221508	0.474755
AMZ2	Healthy_ADM	-0.0214368	0.77835	0.881308
RARA	Healthy_ADM	0.143905	0.137961	0.395652
TRPT1	Healthy_ADM	0.0814908	0.49983	0.698913
ZNF704	Healthy_ADM	0.153844	0.218209	0.471856
SMAGP	Healthy_ADM	-0.397939	0.00556513	0.109136
ERP29	Healthy_ADM	0.125219	0.224589	0.478248
ALDH1L2	Healthy_ADM	-0.164715	0.25493	0.503891
NHP2	Healthy_ADM	0.0132246	0.881029	0.93865
RETREG1	Healthy_ADM	-0.115301	0.362237	0.596908
C18orf32	Healthy_ADM	0.107453	0.176054	0.433116
RGL3	Healthy_ADM	0.12364	0.148433	0.406257
UFD1	Healthy_ADM	-0.133554	0.147135	0.405261
FAM102A	Healthy_ADM	-0.0685154	0.628022	0.789457
RPL38	Healthy_ADM	-0.135769	0.400403	0.627176
EXOC4	Healthy_ADM	-0.0879391	0.140262	0.398533
NRCAM	Healthy_ADM	0.0170115	0.884154	0.940722
CYS1	Healthy_ADM	0.687967	5.45104e-05	0.00418804
FOXK1	Healthy_ADM	0.107825	0.2101	0.464651
EIF3B	Healthy_ADM	-0.13969	0.105983	0.361353
BCO2	Healthy_ADM	-0.0495687	0.743339	0.859713
TRIM16L	Healthy_ADM	-0.0454516	0.824247	0.909281
SIL1	Healthy_ADM	0.0123565	0.898789	0.946204
BTF3	Healthy_ADM	-0.127421	0.058877	0.295632
EEF1B2	Healthy_ADM	-0.307019	0.151602	0.410315
DEFB115	Healthy_ADM	-0.221874	0.0235948	0.206501
DEFB128	Healthy_ADM	-0.431509	0.0272335	0.220712
SKOR2	Healthy_ADM	0.011673	0.904147	0.948982
DEFB130A	Healthy_ADM	-0.0911939	0.248	0.499111
GAB4	Healthy_ADM	-0.0162163	0.903963	0.948963
SLC38A10	Healthy_ADM	0.0537054	0.506418	0.702947
SCNN1A	Healthy_ADM	0.501991	0.000138874	0.00874562
MARVELD2	Healthy_ADM	-0.0772975	0.31003	0.55202
B3GALNT1	Healthy_ADM	-0.0449632	0.623378	0.786827
GOLGA6A	Healthy_ADM	-0.283668	0.0296673	0.229688
CDC42SE2	Healthy_ADM	0.0604174	0.452367	0.662372
GPR149	Healthy_ADM	-0.18974	0.018193	0.183752
CDC42SE1	Healthy_ADM	0.0605157	0.378873	0.610504
SCNN1G	Healthy_ADM	0.028137	0.796876	0.89352
PRPS2	Healthy_ADM	0.0211642	0.859043	0.928143
FER1L6	Healthy_ADM	-0.744152	0.0024364	0.0670504
ZNF718	Healthy_ADM	-0.0666959	0.413044	0.635574
BOLA2B	Healthy_ADM	-0.048677	0.428093	0.646939
TTPAL	Healthy_ADM	-0.120863	0.10843	0.362269
ALG13	Healthy_ADM	0.0658579	0.387292	0.61698
CEACAM16	Healthy_ADM	-0.121817	0.104209	0.35903
SLC25A29	Healthy_ADM	0.0617774	0.62862	0.789778
ZBTB7C	Healthy_ADM	-0.489631	9.20504e-06	0.00104003
PRAMEF10	Healthy_ADM	-0.0967914	0.169768	0.427228
ATP6V1E1	Healthy_ADM	0.143775	0.0259769	0.216083
SPATA6L	Healthy_ADM	-0.0393003	0.768865	0.876888
SRSF5	Healthy_ADM	0.203786	0.144754	0.403828
ETNK1	Healthy_ADM	-0.443126	0.0262702	0.216461
FHL2	Healthy_ADM	-0.74301	0.0779471	0.328776
VWA5B1	Healthy_ADM	-0.191588	0.00896262	0.136087
PRSS53	Healthy_ADM	-0.110687	0.155526	0.413975
SIRPG	Healthy_ADM	-0.053561	0.49102	0.692594
CHRNA1	Healthy_ADM	0.013992	0.874114	0.936133
GK5	Healthy_ADM	0.139601	0.196172	0.453167
AP1S3	Healthy_ADM	-0.0721858	0.533624	0.722948
SEC14L1	Healthy_ADM	-0.141285	0.193591	0.45053
CCNL2	Healthy_ADM	0.812742	0.0962965	0.349156
MAP9	Healthy_ADM	0.185786	0.434489	0.649814
USP9X	Healthy_ADM	0.180759	0.00732795	0.12611
SPAG8	Healthy_ADM	-0.311704	0.0793889	0.330862
IAH1	Healthy_ADM	0.073583	0.269766	0.516475
ZMYM5	Healthy_ADM	0.0220269	0.718693	0.843669
SAPCD1	Healthy_ADM	-0.0778675	0.38535	0.616032
TNFRSF25	Healthy_ADM	-0.0385711	0.580675	0.758261
TYW5	Healthy_ADM	-0.135497	0.0740273	0.32439
SNAPC3	Healthy_ADM	0.0662024	0.414323	0.636268
ENTR1	Healthy_ADM	-0.0758767	0.34252	0.581308
DEDD	Healthy_ADM	-0.0535573	0.46536	0.672419
ABHD18	Healthy_ADM	-0.0925409	0.170178	0.427421
NOSTRIN	Healthy_ADM	0.339896	0.0595991	0.296742
TMPPE	Healthy_ADM	-0.0486866	0.49404	0.695066
CBLN3	Healthy_ADM	-0.108775	0.298997	0.542559
CDC42	Healthy_ADM	0.249816	0.121141	0.379854
CHIC1	Healthy_ADM	-0.0717554	0.513215	0.707101
GPX4	Healthy_ADM	0.253408	0.0233472	0.205472
STRN4	Healthy_ADM	-0.0273751	0.754593	0.866857
PROSER3	Healthy_ADM	-0.0661944	0.429682	0.64743
ZNF384	Healthy_ADM	-0.130439	0.0399522	0.257584
SGSM1	Healthy_ADM	-0.204455	0.0110376	0.151433
PTPN5	Healthy_ADM	-0.290677	0.161315	0.419606
FAM83G	Healthy_ADM	-0.132995	0.297533	0.541763
TCERG1	Healthy_ADM	-0.158609	0.256314	0.504681
FAM3C	Healthy_ADM	0.0110989	0.868548	0.932512
ARL16	Healthy_ADM	0.109225	0.119634	0.377472
C8orf74	Healthy_ADM	-0.304366	0.0351518	0.245296
CD53	Healthy_ADM	0.0120725	0.904004	0.948963
MAPK3	Healthy_ADM	-0.167165	0.0517584	0.278994
OPALIN	Healthy_ADM	-0.0666678	0.634797	0.79238
MUC17	Healthy_ADM	0.106765	0.682947	0.823717
MYH11	Healthy_ADM	-0.0992695	0.193469	0.45053
ARAP1	Healthy_ADM	0.107603	0.119847	0.377681
ACTR3B	Healthy_ADM	0.0629868	0.579789	0.757701
CHTF8	Healthy_ADM	0.00391812	0.964063	0.980927
CEP44	Healthy_ADM	-0.0150856	0.847143	0.921004
AKR1E2	Healthy_ADM	-0.160231	0.249512	0.500246
CLDND1	Healthy_ADM	0.00444111	0.964534	0.981006
TYSND1	Healthy_ADM	-0.152649	0.14556	0.404609
DMRTC2	Healthy_ADM	-0.206195	0.23472	0.486277
U2AF1L4	Healthy_ADM	0.0288555	0.794021	0.891751
PCDH17	Healthy_ADM	0.0474994	0.563047	0.744944
COA3	Healthy_ADM	0.00256872	0.97609	0.987615
MAPK8IP3	Healthy_ADM	-0.0920032	0.133718	0.392454
CCDC112	Healthy_ADM	-0.0857898	0.248428	0.499521
PHF11	Healthy_ADM	-0.0438061	0.472889	0.678344
ASB1	Healthy_ADM	0.0429507	0.591321	0.764449
RUFY1	Healthy_ADM	-0.0188545	0.741799	0.858966
SIDT2	Healthy_ADM	-0.292692	0.0340639	0.242891
RHBDD2	Healthy_ADM	0.158981	0.0667987	0.307498
ERAP1	Healthy_ADM	-0.049576	0.525045	0.716886
LINS1	Healthy_ADM	-0.0380922	0.614249	0.779887
CRCP	Healthy_ADM	-0.100926	0.094487	0.348341
ACP1	Healthy_ADM	-0.0851416	0.176469	0.433444
ZXDC	Healthy_ADM	0.00110247	0.986495	0.993608
TTC23	Healthy_ADM	0.00463197	0.948875	0.972676
SLC29A4	Healthy_ADM	0.106317	0.5675	0.748387
GAGE1	Healthy_ADM	-0.494231	0.0653333	0.30514
INCENP	Healthy_ADM	-0.146929	0.0799151	0.331086
UEVLD	Healthy_ADM	-0.0685083	0.44253	0.65565
KIAA0895L	Healthy_ADM	-0.0164245	0.824208	0.909281
RALGDS	Healthy_ADM	-0.198136	0.00841699	0.133654
RO60	Healthy_ADM	-0.0748069	0.504536	0.702124
PREPL	Healthy_ADM	0.0434354	0.478973	0.682609
PPP4R1	Healthy_ADM	0.00811602	0.89834	0.946166
NAAA	Healthy_ADM	-0.1244	0.0931157	0.34678
ANKZF1	Healthy_ADM	-0.146139	0.277891	0.524708
CYLD	Healthy_ADM	0.0937506	0.194544	0.450921
RUFY2	Healthy_ADM	-0.0334028	0.654555	0.805917
CAST	Healthy_ADM	0.00991862	0.927389	0.963145
TGFB1I1	Healthy_ADM	-0.419969	0.123158	0.381789
TMEM80	Healthy_ADM	-0.0843303	0.33345	0.57436
SUMF2	Healthy_ADM	0.000699295	0.991989	0.996529
GSDMB	Healthy_ADM	-0.483365	0.0242909	0.209694
ACBD5	Healthy_ADM	-0.00490988	0.944208	0.970366
SMIM8	Healthy_ADM	-0.0973114	0.147527	0.405404
DEFA1B	Healthy_ADM	-0.114362	0.17801	0.435003
LGALS7B	Healthy_ADM	-0.662211	0.324771	0.565553
SERPINA9	Healthy_ADM	0.00782767	0.930572	0.964758
C2orf88	Healthy_ADM	-0.191128	0.104945	0.359952
RIOX2	Healthy_ADM	-0.0929301	0.284915	0.530538
SLC9A6	Healthy_ADM	-0.0527469	0.446189	0.659004
NCBP2	Healthy_ADM	-0.058153	0.425763	0.645194
FEZ2	Healthy_ADM	0.0287568	0.799137	0.894879
SMC2	Healthy_ADM	-0.0165506	0.807491	0.89835
EIF4G2	Healthy_ADM	0.315281	0.0132697	0.161469
CHD2	Healthy_ADM	-0.0251559	0.742264	0.859246
ENGASE	Healthy_ADM	-0.129931	0.103516	0.357969
SNUPN	Healthy_ADM	-0.146824	0.0402417	0.257953
TMEM8B	Healthy_ADM	0.00134701	0.983384	0.991644
KDM5A	Healthy_ADM	-0.00583129	0.928531	0.963521
NGDN	Healthy_ADM	-0.0678757	0.402458	0.627957
SHPRH	Healthy_ADM	0.00754722	0.912911	0.954791
PJVK	Healthy_ADM	-0.046952	0.652861	0.804608
GTPBP10	Healthy_ADM	-0.0779706	0.253932	0.503335
NECTIN2	Healthy_ADM	0.021524	0.856982	0.926994
STAG2	Healthy_ADM	0.132107	0.0476584	0.271337
SLC6A2	Healthy_ADM	-0.168999	0.0451048	0.265685
MIDEAS	Healthy_ADM	-0.0614495	0.502798	0.701528
TPM3	Healthy_ADM	0.044444	0.529375	0.720292
SLC6A4	Healthy_ADM	-0.120166	0.14077	0.398944
SLA	Healthy_ADM	-0.160022	0.0438666	0.263662
SLC12A2	Healthy_ADM	-0.162777	0.563471	0.745376
SRD5A1	Healthy_ADM	0.062901	0.715812	0.841994
SST	Healthy_ADM	1.19076	0.0952576	0.349005
STIL	Healthy_ADM	-0.132953	0.335617	0.576051
PHACTR4	Healthy_ADM	0.0571728	0.613184	0.779155
CLCC1	Healthy_ADM	0.0487807	0.605402	0.774443
DBNDD2	Healthy_ADM	-0.115549	0.461651	0.669645
UBL5	Healthy_ADM	0.10359	0.0867757	0.3405
SMIM15	Healthy_ADM	-0.203415	0.000803536	0.0310936
SSTR4	Healthy_ADM	-0.312055	0.129468	0.387949
SULT1A2	Healthy_ADM	0.136051	0.0467902	0.270496
SULT1C2	Healthy_ADM	-0.767088	0.00803552	0.13229
TBXAS1	Healthy_ADM	-0.155909	0.128072	0.386251
TCN1	Healthy_ADM	0.590103	0.390542	0.619433
TKT	Healthy_ADM	-0.229048	0.225252	0.478578
TNFRSF1A	Healthy_ADM	-0.0554958	0.589904	0.763856
TOP2B	Healthy_ADM	0.154747	0.0666015	0.307498
TUBB2A	Healthy_ADM	-0.207712	0.144728	0.403828
UGT2B15	Healthy_ADM	-0.501251	0.270624	0.517549
ACSS2	Healthy_ADM	-0.0735002	0.498404	0.697999
ZNF391	Healthy_ADM	0.0471254	0.422995	0.643029
QSER1	Healthy_ADM	0.0145051	0.841562	0.91934
METTL9	Healthy_ADM	-0.00222232	0.970472	0.984438
CDC14B	Healthy_ADM	-0.0728777	0.528751	0.7199
FSCN2	Healthy_ADM	-0.215022	0.00494587	0.103166
MYH14	Healthy_ADM	-0.147861	0.200007	0.457265
ATG9A	Healthy_ADM	0.0162567	0.827963	0.911615
SPPL2B	Healthy_ADM	0.0938802	0.609339	0.776986
UBXN11	Healthy_ADM	-0.084397	0.521423	0.714098
WIPF1	Healthy_ADM	-0.363225	0.169485	0.427075
BCLAF1	Healthy_ADM	0.157919	0.0184833	0.184425
TSEN34	Healthy_ADM	-0.120671	0.237074	0.488453
SLC38A1	Healthy_ADM	-0.0454393	0.75027	0.864291
NFKB2	Healthy_ADM	-0.0712029	0.699848	0.831956
FAM222B	Healthy_ADM	0.0501413	0.480146	0.683018
KLK10	Healthy_ADM	-0.0026483	0.9942	0.997316
SLC39A7	Healthy_ADM	-0.00866104	0.944681	0.970708
UBXN2B	Healthy_ADM	-0.059345	0.416613	0.637744
VPS37D	Healthy_ADM	-0.0979804	0.280028	0.52631
APH1A	Healthy_ADM	-0.0230113	0.767843	0.876183
TNFAIP8	Healthy_ADM	-0.118682	0.170439	0.427655
ALG9	Healthy_ADM	-0.0925301	0.344576	0.583637
MIER1	Healthy_ADM	-0.0936195	0.181403	0.438138
RTL8C	Healthy_ADM	0.162724	0.104055	0.358874
KTN1	Healthy_ADM	-0.0118769	0.88232	0.939516
IKZF2	Healthy_ADM	-0.16065	0.247917	0.499111
TRAPPC6B	Healthy_ADM	-0.0658575	0.536677	0.72544
HNRNPUL2	Healthy_ADM	-0.0523594	0.474472	0.678936
TMTC4	Healthy_ADM	-0.180132	0.0343494	0.242929
FNDC3A	Healthy_ADM	-0.0137189	0.904269	0.948982
KIAA1191	Healthy_ADM	-0.0395696	0.566768	0.747678
OCIAD1	Healthy_ADM	0.0003944	0.993599	0.997163
CASZ1	Healthy_ADM	-0.239973	0.0204542	0.192586
DBI	Healthy_ADM	0.00698057	0.955747	0.976573
CUL4B	Healthy_ADM	0.0908264	0.388332	0.617841
RASA4	Healthy_ADM	-0.0523965	0.739897	0.857798
PRKD2	Healthy_ADM	0.0615674	0.554589	0.738843
CT47A10	Healthy_ADM	-0.140516	0.182974	0.440272
AATK	Healthy_ADM	-0.266315	0.0126805	0.158915
ECPAS	Healthy_ADM	0.0722743	0.354009	0.591646
PLIN4	Healthy_ADM	-0.0715619	0.451338	0.66225
CCDC88C	Healthy_ADM	-0.295753	0.0816214	0.333972
U2SURP	Healthy_ADM	0.006043	0.921699	0.960739
UNK	Healthy_ADM	0.0478689	0.375329	0.60734
KDM6B	Healthy_ADM	0.221267	0.0390654	0.256969
SLC45A4	Healthy_ADM	0.254293	0.0139674	0.164414
GPR108	Healthy_ADM	0.329498	0.00047965	0.0218532
INTS1	Healthy_ADM	0.228666	0.00840777	0.133654
SYCN	Healthy_ADM	-0.154319	0.846552	0.921004
ARHGEF28	Healthy_ADM	-0.313238	0.000897847	0.0338182
ONECUT3	Healthy_ADM	-0.910854	0.0130652	0.160351
TTC39A	Healthy_ADM	-0.393143	0.000167513	0.00970836
TNRC18	Healthy_ADM	-0.0467588	0.752137	0.865588
RGP1	Healthy_ADM	-0.130283	0.186401	0.443106
BICC1	Healthy_ADM	1.29279	1.54578e-07	3.49302e-05
SETD5	Healthy_ADM	0.023789	0.794844	0.892023
MYO7B	Healthy_ADM	-0.515931	0.18924	0.445308
AKR1B15	Healthy_ADM	-0.961827	0.113906	0.368929
PXN	Healthy_ADM	-0.200359	0.333805	0.574383
ELN	Healthy_ADM	-0.107671	0.470984	0.67678
ASRGL1	Healthy_ADM	-0.0704616	0.803774	0.897032
ZNF655	Healthy_ADM	0.0923391	0.340679	0.579947
PLOD3	Healthy_ADM	0.268596	0.107843	0.362201
SERPINA3	Healthy_ADM	2.68007	0.0666943	0.307498
AADAC	Healthy_ADM	-0.562811	0.0678284	0.309825
AAMP	Healthy_ADM	-0.110358	0.159828	0.417697
AOC1	Healthy_ADM	-0.447846	0.0346735	0.243284
ABR	Healthy_ADM	-0.00957421	0.957148	0.977115
MCRIP1	Healthy_ADM	0.203608	0.269508	0.516475
TXNRD1	Healthy_ADM	0.125159	0.56098	0.743543
ACLY	Healthy_ADM	0.222971	0.134816	0.392699
GPR89A	Healthy_ADM	-0.305074	0.0119455	0.156083
GCNT1	Healthy_ADM	-0.938008	9.36039e-06	0.00104226
ACO2	Healthy_ADM	-0.223333	0.0664532	0.307361
HNRNPF	Healthy_ADM	-0.0311134	0.776601	0.881209
CTNNB1	Healthy_ADM	0.492438	0.0651674	0.304878
HDAC7	Healthy_ADM	0.0734195	0.436542	0.651127
SMARCD2	Healthy_ADM	-0.0379144	0.61678	0.78158
SLC4A4	Healthy_ADM	1.63271	0.0187787	0.185923
PTPRJ	Healthy_ADM	-0.018261	0.881649	0.939097
HTATIP2	Healthy_ADM	-0.449653	0.0499958	0.276941
OBSCN	Healthy_ADM	-0.387076	0.0466471	0.269872
RBM47	Healthy_ADM	-0.0890617	0.453141	0.663013
BET1L	Healthy_ADM	-0.0968565	0.19802	0.455916
TINF2	Healthy_ADM	0.0589642	0.39214	0.621198
MROH1	Healthy_ADM	-0.340299	0.0649154	0.304839
COMMD7	Healthy_ADM	-0.13522	0.185153	0.442476
EHBP1L1	Healthy_ADM	-0.00336071	0.976137	0.987615
BCAS3	Healthy_ADM	-0.22759	0.0481736	0.272546
ULK3	Healthy_ADM	-0.311796	0.000475972	0.0218532
SYBU	Healthy_ADM	-0.543016	0.0117328	0.154372
PDS5A	Healthy_ADM	0.00894722	0.891123	0.944345
SENP6	Healthy_ADM	0.246257	0.00204406	0.0600591
REX1BD	Healthy_ADM	0.000532726	0.995627	0.997949
SPATS2L	Healthy_ADM	0.351871	0.0360576	0.247791
PLEKHB2	Healthy_ADM	-0.0552882	0.736171	0.855414
CXCL16	Healthy_ADM	0.107673	0.675759	0.820329
PACS2	Healthy_ADM	0.106285	0.201463	0.458619
TMEM176B	Healthy_ADM	0.245539	0.415507	0.637321
CXXC1	Healthy_ADM	-0.131716	0.0903452	0.345334
NRDC	Healthy_ADM	0.0377727	0.589569	0.763856
SAMD12	Healthy_ADM	-0.42894	0.147209	0.405261
ACTN1	Healthy_ADM	-0.538575	0.558732	0.741448
DGLUCY	Healthy_ADM	-0.0479265	0.619006	0.783109
TBC1D8	Healthy_ADM	0.18608	0.0578786	0.293519
AQP12B	Healthy_ADM	-0.31122	0.499273	0.698582
BICDL2	Healthy_ADM	-0.447765	0.000371424	0.0182926
ACVR1	Healthy_ADM	-0.402196	0.0820798	0.334362
FBRS	Healthy_ADM	-0.342092	0.0398963	0.257584
CORO1C	Healthy_ADM	0.212047	0.142601	0.401174
TMC5	Healthy_ADM	-0.518197	0.145356	0.404188
FAM135A	Healthy_ADM	-0.352662	0.222442	0.475389
PLA2G2C	Healthy_ADM	-0.444839	0.128616	0.386826
FBXO45	Healthy_ADM	0.164736	0.275781	0.522492
ADAM8	Healthy_ADM	-0.833041	0.0867305	0.340496
HECTD4	Healthy_ADM	-0.12211	0.361642	0.5967
SYNPO	Healthy_ADM	0.959716	0.00377497	0.0889665
ADAM10	Healthy_ADM	0.0738074	0.629283	0.790022
TMEM87A	Healthy_ADM	-0.124417	0.0650696	0.304839
SLC35E2B	Healthy_ADM	0.0303427	0.769359	0.877
MECP2	Healthy_ADM	0.0323388	0.727478	0.848908
ADAR	Healthy_ADM	0.0711386	0.333648	0.574371
DDX54	Healthy_ADM	-0.152873	0.105679	0.361018
TSTD1	Healthy_ADM	0.195547	0.184266	0.441585
LDB1	Healthy_ADM	0.244663	0.0202056	0.191497
ARHGEF7	Healthy_ADM	-0.146751	0.175813	0.433078
LIMA1	Healthy_ADM	-0.626065	0.0476763	0.271337
ENTPD6	Healthy_ADM	0.0381943	0.611235	0.778148
LSM14A	Healthy_ADM	0.128403	0.0593641	0.296457
SEZ6L2	Healthy_ADM	-0.142574	0.308995	0.551546
C1QC	Healthy_ADM	0.628021	0.0236254	0.206501
SLC44A3	Healthy_ADM	0.2435	0.00351892	0.0852865
CTSC	Healthy_ADM	-0.0896165	0.617432	0.782148
AEBP2	Healthy_ADM	0.104779	0.164834	0.42369
CLCN7	Healthy_ADM	-0.0980033	0.178402	0.435269
DHX36	Healthy_ADM	-0.0908888	0.611524	0.778265
SZRD1	Healthy_ADM	0.318935	0.000152545	0.00915627
MGAT1	Healthy_ADM	0.114789	0.26527	0.513626
ENG	Healthy_ADM	1.04566	0.00571671	0.110445
WDR26	Healthy_ADM	0.210322	0.00048354	0.0218532
ADD1	Healthy_ADM	0.188915	0.0583814	0.294225
ADD3	Healthy_ADM	-0.391601	1.9062e-06	0.000298885
DDX3Y	Healthy_ADM	-0.0124062	0.891483	0.944373
ABCD3	Healthy_ADM	0.0963281	0.245558	0.497113
SLC50A1	Healthy_ADM	-0.220826	0.226813	0.479954
ADK	Healthy_ADM	0.076251	0.317169	0.558448
PARK7	Healthy_ADM	0.125227	0.14485	0.403828
PABPC1L	Healthy_ADM	0.322648	0.000381936	0.0186906
SPNS2	Healthy_ADM	0.555057	7.53119e-05	0.00561768
AP1B1	Healthy_ADM	0.143379	0.227097	0.480129
MRO	Healthy_ADM	-0.150002	0.028273	0.225277
CFLAR	Healthy_ADM	0.433306	1.56912e-10	7.57949e-08
PCID2	Healthy_ADM	0.0866917	0.235997	0.487541
HMOX2	Healthy_ADM	-0.0124137	0.878629	0.937298
AURKAIP1	Healthy_ADM	-0.207829	0.109828	0.363867
UBAP2L	Healthy_ADM	0.151684	0.0345702	0.243113
MYRF	Healthy_ADM	0.233438	0.0447241	0.265685
STXBP2	Healthy_ADM	-0.305132	0.150993	0.409706
ERLEC1	Healthy_ADM	-0.0925148	0.279332	0.52631
YPEL5	Healthy_ADM	0.0542022	0.439742	0.653686
MET	Healthy_ADM	-0.578434	0.161945	0.420137
ING4	Healthy_ADM	0.00121196	0.987045	0.993862
BEX4	Healthy_ADM	0.156609	0.460998	0.669154
CTSA	Healthy_ADM	0.101693	0.439326	0.653511
ETFA	Healthy_ADM	-0.11801	0.0973536	0.34978
ATXN7	Healthy_ADM	0.0618673	0.496983	0.69736
PAK3	Healthy_ADM	0.119903	0.512377	0.707004
UGT8	Healthy_ADM	-0.372642	0.00684974	0.122585
VGLL4	Healthy_ADM	0.247639	0.00184858	0.0575005
TPRN	Healthy_ADM	-0.0544294	0.633567	0.791725
TSPAN14	Healthy_ADM	0.161473	0.259257	0.507596
MPV17L	Healthy_ADM	-0.0341878	0.773813	0.879217
MAPKBP1	Healthy_ADM	-0.181911	0.216591	0.470666
USP8	Healthy_ADM	0.110913	0.219434	0.472642
TOMM40	Healthy_ADM	0.0296324	0.714987	0.841618
INPP1	Healthy_ADM	-0.11147	0.180233	0.436811
ENTPD4	Healthy_ADM	0.536419	0.10047	0.355064
AEBP1	Healthy_ADM	0.925374	0.00707951	0.124489
CALHM3	Healthy_ADM	-0.392834	0.0346174	0.243113
KRBOX4	Healthy_ADM	-0.514494	0.163553	0.421979
SLC9A3R2	Healthy_ADM	-0.149655	0.488942	0.691177
ANKRD33	Healthy_ADM	-0.366968	0.0249598	0.211897
ATP6V0A1	Healthy_ADM	0.0337641	0.836256	0.915579
SHC1	Healthy_ADM	-0.0356957	0.636554	0.793611
DOCK9	Healthy_ADM	-0.339236	0.122036	0.381596
ATF7	Healthy_ADM	0.203701	0.00329551	0.0822058
PLD1	Healthy_ADM	0.42754	0.333405	0.57436
PLXNB1	Healthy_ADM	0.602199	1.37181e-09	4.79074e-07
ABHD17A	Healthy_ADM	0.349938	0.118014	0.375065
LTBP3	Healthy_ADM	0.54077	0.017413	0.181525
YAP1	Healthy_ADM	0.415942	0.00286813	0.0752805
MYO1B	Healthy_ADM	0.670994	0.0163682	0.177123
ACAA1	Healthy_ADM	0.119457	0.102129	0.356794
SMARCC2	Healthy_ADM	0.118793	0.273495	0.520501
SPAG9	Healthy_ADM	0.130188	0.187278	0.443955
EIF4E	Healthy_ADM	0.00641589	0.958527	0.978058
HMGB2	Healthy_ADM	-0.321006	0.1079	0.362201
AHCYL2	Healthy_ADM	-0.240011	0.0621058	0.300667
PSMB5	Healthy_ADM	0.239445	0.136213	0.394617
PITPNM1	Healthy_ADM	-0.0762819	0.276336	0.523057
CBLC	Healthy_ADM	-0.200035	0.186632	0.443106
SUGT1	Healthy_ADM	-0.0543549	0.669915	0.816588
SUN1	Healthy_ADM	-0.0351137	0.553698	0.738504
ZNF385A	Healthy_ADM	-0.0690784	0.448328	0.66012
NSMF	Healthy_ADM	0.00475933	0.952928	0.974361
PEX5	Healthy_ADM	-0.00879009	0.902578	0.948373
PSMG3	Healthy_ADM	-0.276143	0.0461408	0.268747
SLC6A6	Healthy_ADM	-0.146163	0.440626	0.654169
ZDHHC4	Healthy_ADM	-0.10913	0.147272	0.405261
C7orf50	Healthy_ADM	-0.12548	0.278653	0.525501
VAV2	Healthy_ADM	0.0436919	0.728656	0.850025
CDV3	Healthy_ADM	0.079403	0.579488	0.757565
DSG4	Healthy_ADM	-0.167589	0.0939058	0.347441
TOMM6	Healthy_ADM	-0.0619169	0.598683	0.768791
DERL1	Healthy_ADM	0.0490771	0.480077	0.683018
NFIA	Healthy_ADM	0.159662	0.0545503	0.285868
OST4	Healthy_ADM	-0.221913	0.000361226	0.0180214
SARDH	Healthy_ADM	-0.508343	0.0187255	0.185923
DEK	Healthy_ADM	-0.0280839	0.767416	0.875826
ARFRP1	Healthy_ADM	0.230428	0.0011345	0.0403534
KLC2	Healthy_ADM	0.0861141	0.309706	0.552005
AHI1	Healthy_ADM	0.128118	0.181072	0.437616
ASAP2	Healthy_ADM	-0.563707	0.162471	0.420717
TAF12	Healthy_ADM	-0.205996	0.135151	0.393233
NDRG1	Healthy_ADM	-1.46995	0.0835415	0.336661
MKNK1	Healthy_ADM	-0.146947	0.452964	0.66288
ARHGAP26	Healthy_ADM	-0.257225	0.157495	0.415677
PTPRK	Healthy_ADM	0.332776	0.110336	0.364534
EIF2AK2	Healthy_ADM	-0.0832219	0.331568	0.572586
PABPC4	Healthy_ADM	-0.319844	0.0797551	0.330911
SMIM19	Healthy_ADM	-0.228926	0.0285287	0.226142
ECD	Healthy_ADM	-0.0684477	0.609656	0.776986
RPN2	Healthy_ADM	0.0359017	0.726838	0.848549
POSTN	Healthy_ADM	-0.0105972	0.937087	0.967688
NDUFB11	Healthy_ADM	0.0348264	0.674513	0.819592
PUF60	Healthy_ADM	-0.00832841	0.941636	0.969471
TRMT1	Healthy_ADM	-0.365775	0.00416789	0.0930049
ZNF415	Healthy_ADM	-0.0443779	0.591051	0.764362
TMUB1	Healthy_ADM	0.000641818	0.994445	0.997431
LRIG3	Healthy_ADM	-0.059314	0.691817	0.828039
OTUD5	Healthy_ADM	-0.120935	0.337835	0.577703
FZR1	Healthy_ADM	-0.093133	0.612655	0.778923
GRAMD1A	Healthy_ADM	-0.226409	0.253921	0.503335
ATXN7L3B	Healthy_ADM	0.322036	0.104117	0.358874
IFFO2	Healthy_ADM	0.427456	0.131911	0.391757
DAZAP2	Healthy_ADM	0.195685	0.007492	0.127066
AKIRIN1	Healthy_ADM	0.110398	0.256384	0.504689
ZNF841	Healthy_ADM	-0.313255	0.0531039	0.281766
SMIM24	Healthy_ADM	-0.763093	4.00225e-05	0.00337904
LRRFIP1	Healthy_ADM	0.131992	0.34239	0.581308
ILF3	Healthy_ADM	0.385992	0.016913	0.178028
BCAP31	Healthy_ADM	0.0857088	0.498188	0.697841
MGRN1	Healthy_ADM	0.225635	0.0221619	0.201083
ARFGAP3	Healthy_ADM	-0.0747798	0.541437	0.72916
TMEM67	Healthy_ADM	-0.561473	0.366477	0.600113
MORF4L2	Healthy_ADM	0.0341649	0.717509	0.842871
EDC3	Healthy_ADM	-0.315717	0.0491741	0.27507
HES4	Healthy_ADM	0.064256	0.898373	0.946166
BMERB1	Healthy_ADM	-0.411786	0.106461	0.361353
CPSF7	Healthy_ADM	0.212988	0.0753244	0.32659
ITPK1	Healthy_ADM	-0.0161353	0.902504	0.948373
FBRSL1	Healthy_ADM	0.0532557	0.532063	0.721865
ATG13	Healthy_ADM	-0.0993947	0.25473	0.503835
CHID1	Healthy_ADM	-0.000260412	0.99797	0.999531
SLC6A8	Healthy_ADM	-0.363314	0.0954555	0.349133
PIEZO1	Healthy_ADM	0.930825	0.12527	0.382929
API5	Healthy_ADM	0.00161902	0.981949	0.990718
AMIGO2	Healthy_ADM	-0.485775	0.151738	0.410315
MPC2	Healthy_ADM	0.0719194	0.751196	0.864831
CTDNEP1	Healthy_ADM	0.150791	0.025276	0.213501
SLC25A39	Healthy_ADM	-0.066192	0.353541	0.591261
BSDC1	Healthy_ADM	-0.115708	0.12471	0.3826
TMEM30A	Healthy_ADM	-0.12802	0.426368	0.645347
CAPN8	Healthy_ADM	-0.883517	0.0450236	0.265685
NDE1	Healthy_ADM	-0.469428	0.106085	0.361353
BANF1	Healthy_ADM	-0.0340922	0.727016	0.848549
AMFR	Healthy_ADM	0.136883	0.1818	0.43882
COPB1	Healthy_ADM	0.0335019	0.684881	0.824553
ABCC3	Healthy_ADM	0.204742	0.233605	0.485436
SCG5	Healthy_ADM	1.00005	0.0677529	0.309825
PHLDB1	Healthy_ADM	0.768246	4.38366e-17	2.34651e-13
MYL12B	Healthy_ADM	0.0412641	0.689392	0.826628
ANG	Healthy_ADM	-0.410127	0.000168061	0.00970836
PALM3	Healthy_ADM	0.31531	0.045583	0.266674
C11orf96	Healthy_ADM	0.490517	0.000151075	0.00915627
AK9	Healthy_ADM	-0.113845	0.0980459	0.350855
SLC1A5	Healthy_ADM	0.0257586	0.898069	0.946166
CRHR1	Healthy_ADM	-0.62167	0.00432774	0.0939266
C12orf75	Healthy_ADM	0.43356	0.00128986	0.0448417
LAMTOR2	Healthy_ADM	-0.0368342	0.774528	0.879217
EXOC7	Healthy_ADM	0.186544	0.0330628	0.239497
ETV3	Healthy_ADM	-0.120703	0.269868	0.516482
ELF1	Healthy_ADM	-0.0844543	0.480238	0.683018
TMEM205	Healthy_ADM	0.216364	0.00555767	0.109136
YPEL3	Healthy_ADM	-0.11517	0.15989	0.417697
PHGR1	Healthy_ADM	-0.434685	0.0331636	0.239602
RASGRF1	Healthy_ADM	0.118156	0.252101	0.502388
ZNF529	Healthy_ADM	-0.362252	0.039877	0.257584
CTAGE9	Healthy_ADM	0.00498719	0.947216	0.971762
GLG1	Healthy_ADM	0.169517	0.109405	0.363407
SORBS2	Healthy_ADM	1.09052	0.00368946	0.0880316
CT47B1	Healthy_ADM	-0.625347	0.0125088	0.158726
FKBP5	Healthy_ADM	-0.290305	0.280537	0.526653
SEMA7A	Healthy_ADM	-0.237891	0.444178	0.656777
MBOAT7	Healthy_ADM	0.0108531	0.94317	0.970134
PARP9	Healthy_ADM	-0.203685	0.163875	0.422358
PTGR1	Healthy_ADM	-0.195656	0.282628	0.527943
PIP4K2C	Healthy_ADM	-0.307605	0.0226567	0.20288
TCF7L2	Healthy_ADM	-0.445459	0.207665	0.463268
SRP54	Healthy_ADM	0.0327856	0.650449	0.803054
KDM4C	Healthy_ADM	-0.203646	0.108122	0.362269
RBM19	Healthy_ADM	-0.262961	0.0634795	0.303298
ANK3	Healthy_ADM	0.227219	0.00588648	0.112214
ANPEP	Healthy_ADM	0.000288462	0.999538	0.999798
SLC25A4	Healthy_ADM	0.155331	0.195202	0.451593
ANXA4	Healthy_ADM	1.03047	6.59249e-09	2.11042e-06
ANXA5	Healthy_ADM	0.558662	0.0619651	0.300667
ANXA7	Healthy_ADM	0.126139	0.262413	0.510959
SH3YL1	Healthy_ADM	0.711983	0.0216821	0.199263
SYNCRIP	Healthy_ADM	0.173653	0.0125043	0.158726
CANT1	Healthy_ADM	-0.24496	0.112211	0.366601
EPS15	Healthy_ADM	0.180826	0.0546784	0.286168
CLDN10	Healthy_ADM	0.865079	0.112165	0.366601
RNF170	Healthy_ADM	-1.14604	0.0518916	0.278994
SPG11	Healthy_ADM	-0.212978	0.00397051	0.0912686
TRAPPC9	Healthy_ADM	0.162818	0.0564462	0.290473
NPTN	Healthy_ADM	0.0310854	0.83848	0.916887
ALDH3B1	Healthy_ADM	0.101222	0.723282	0.846507
TNIK	Healthy_ADM	-0.153962	0.309371	0.55174
MAFF	Healthy_ADM	-1.06519	0.297458	0.541763
WWC1	Healthy_ADM	0.81765	3.3091e-15	3.63197e-12
AHCY	Healthy_ADM	-0.317929	0.0144577	0.167287
PDP1	Healthy_ADM	0.0934224	0.233141	0.485426
PDCD6IP	Healthy_ADM	0.048942	0.595757	0.767214
SH3D21	Healthy_ADM	0.10227	0.431771	0.648636
FBXL17	Healthy_ADM	-0.0966036	0.526584	0.71835
PPP6R3	Healthy_ADM	0.107569	0.20675	0.462164
PLIN3	Healthy_ADM	0.235139	0.0400224	0.257584
DDHD2	Healthy_ADM	-0.0332793	0.622064	0.785555
SLC37A4	Healthy_ADM	0.524275	0.0582376	0.294175
TRAF3IP2	Healthy_ADM	-0.261906	0.243607	0.49488
FLNB	Healthy_ADM	0.304063	0.341212	0.580484
BRD8	Healthy_ADM	0.083	0.391825	0.621084
C6orf132	Healthy_ADM	-0.399113	0.255736	0.50454
ACIN1	Healthy_ADM	0.197544	0.0024135	0.0669421
TMEM41B	Healthy_ADM	-0.256123	0.0464029	0.26927
LDHA	Healthy_ADM	-0.00437561	0.971138	0.984854
DAG1	Healthy_ADM	0.0320226	0.825571	0.909717
STARD3	Healthy_ADM	-0.286828	0.14418	0.403339
HES7	Healthy_ADM	-0.099552	0.32789	0.568719
FRAS1	Healthy_ADM	0.44762	0.0392529	0.25735
NDUFS2	Healthy_ADM	0.103403	0.239513	0.490452
RGMA	Healthy_ADM	0.373599	0.00212148	0.0610461
SHMT2	Healthy_ADM	-0.117401	0.395468	0.623921
MTUS1	Healthy_ADM	0.00870298	0.928151	0.963256
AFF1	Healthy_ADM	0.17193	0.349234	0.587641
XIAP	Healthy_ADM	-0.0261914	0.701805	0.833251
DMAC2	Healthy_ADM	-0.0614519	0.423742	0.643534
BIRC5	Healthy_ADM	-0.0988902	0.233549	0.485436
TBC1D17	Healthy_ADM	-0.175653	0.111606	0.36557
GAREM2	Healthy_ADM	0.00952063	0.890954	0.94431
WWTR1	Healthy_ADM	0.678693	0.356812	0.593888
EDN1	Healthy_ADM	0.0952362	0.740747	0.857877
TESC	Healthy_ADM	-0.0314646	0.892022	0.944385
KRTCAP3	Healthy_ADM	-0.167953	0.0375466	0.251558
TSPAN3	Healthy_ADM	-0.08327	0.47054	0.67667
AQP8	Healthy_ADM	-0.359818	0.14384	0.402937
DZIP1L	Healthy_ADM	-0.0598974	0.603756	0.772961
RMDN2	Healthy_ADM	0.0881656	0.362092	0.596908
ERICH5	Healthy_ADM	0.432059	0.0549056	0.286966
STRBP	Healthy_ADM	-0.143376	0.0345531	0.243113
PET100	Healthy_ADM	-0.0297436	0.795147	0.892102
UBAP1	Healthy_ADM	-0.0467969	0.637393	0.79408
MCFD2	Healthy_ADM	0.00985922	0.930757	0.964758
C3orf52	Healthy_ADM	-0.565136	0.00226302	0.0641391
KXD1	Healthy_ADM	-0.114092	0.140491	0.398889
CDHR2	Healthy_ADM	-0.398017	0.015418	0.173436
MASTL	Healthy_ADM	-0.0483804	0.509559	0.705802
GOLGA3	Healthy_ADM	-0.0771013	0.387383	0.61698
TSFM	Healthy_ADM	-0.334867	0.0404635	0.258182
PGM1	Healthy_ADM	-0.254902	0.0246742	0.211245
YTHDF2	Healthy_ADM	0.0587582	0.42575	0.645194
MAN2B1	Healthy_ADM	0.17976	0.122528	0.381596
DGCR2	Healthy_ADM	0.13802	0.0901093	0.344767
BRD7	Healthy_ADM	-0.246501	0.115507	0.371677
SERINC5	Healthy_ADM	0.00957409	0.926146	0.963032
LDHB	Healthy_ADM	-0.137933	0.497301	0.69736
PRR7	Healthy_ADM	-0.194926	0.233102	0.485426
DMXL2	Healthy_ADM	-0.0500543	0.736352	0.855496
GOLGA7	Healthy_ADM	0.0436679	0.501218	0.700155
RABEPK	Healthy_ADM	-0.0503897	0.473685	0.678562
ARHGDIB	Healthy_ADM	0.271011	0.0527048	0.280829
ARL1	Healthy_ADM	0.0289462	0.734047	0.854289
LGALS3	Healthy_ADM	-0.261678	0.379378	0.61106
PPP2R2A	Healthy_ADM	-0.0906521	0.305212	0.548692
SUCLG2	Healthy_ADM	0.113211	0.456753	0.665131
KLF11	Healthy_ADM	0.0701482	0.532594	0.72202
SRPRA	Healthy_ADM	-0.0826038	0.605881	0.774926
PHETA1	Healthy_ADM	-0.545878	0.0113868	0.153499
STX3	Healthy_ADM	-0.276171	0.0686423	0.311983
BCAT1	Healthy_ADM	-0.0065949	0.981152	0.990044
SCAMP5	Healthy_ADM	-0.272908	0.0167423	0.177545
IGLL5	Healthy_ADM	-0.729113	0.0240971	0.209196
ATP6AP1	Healthy_ADM	0.219683	0.00309769	0.0790683
PIGT	Healthy_ADM	0.00453011	0.973155	0.985784
CTTN	Healthy_ADM	-0.163965	0.10714	0.361797
CLTA	Healthy_ADM	0.0925205	0.172426	0.430094
GNL3L	Healthy_ADM	-0.0167846	0.847635	0.921004
PACSIN2	Healthy_ADM	-0.126809	0.506647	0.703138
MARF1	Healthy_ADM	-0.0723614	0.357821	0.594279
NDUFA2	Healthy_ADM	0.0499934	0.359531	0.595319
TUT7	Healthy_ADM	0.0244299	0.803963	0.897032
ARHGDIA	Healthy_ADM	0.0584224	0.424362	0.644201
BACH1	Healthy_ADM	0.296177	3.64057e-05	0.00310784
BAK1	Healthy_ADM	-0.150506	0.100005	0.354075
BCAT2	Healthy_ADM	0.00291931	0.973177	0.985784
RPH3AL	Healthy_ADM	-0.198876	0.225209	0.478578
TAF6	Healthy_ADM	-0.30084	0.134502	0.392546
MTRNR2L1	Healthy_ADM	0.107519	0.262064	0.510896
KRTAP9-1	Healthy_ADM	-0.596353	0.0182485	0.183752
ALS2CL	Healthy_ADM	0.0921655	0.638126	0.79422
TMEM221	Healthy_ADM	-0.622719	0.10277	0.357868
CNOT4	Healthy_ADM	0.0741273	0.28009	0.52631
PLEKHA5	Healthy_ADM	-0.0523345	0.557812	0.741081
HYI	Healthy_ADM	0.0395839	0.748729	0.863477
FAM193B	Healthy_ADM	-0.0412617	0.669561	0.816287
GSTO1	Healthy_ADM	0.259473	0.0881081	0.34244
SRSF10	Healthy_ADM	-0.0433873	0.503355	0.701528
SEC31A	Healthy_ADM	-0.176497	0.0560087	0.289781
SLC25A22	Healthy_ADM	-0.00829471	0.94233	0.969761
SIRT6	Healthy_ADM	-0.403517	0.0602291	0.29759
DIDO1	Healthy_ADM	-0.0698668	0.593584	0.765442
NDUFA11	Healthy_ADM	0.132115	0.267924	0.51526
UCKL1	Healthy_ADM	0.153738	0.059882	0.297205
PLEKHS1	Healthy_ADM	0.750266	0.0327326	0.239014
KANSL1	Healthy_ADM	0.0280967	0.698045	0.831614
SECISBP2L	Healthy_ADM	0.0134724	0.889599	0.943577
FBXL5	Healthy_ADM	0.211872	0.00719893	0.125703
MATR3	Healthy_ADM	0.177797	0.0745149	0.325176
MEPCE	Healthy_ADM	0.0336954	0.81415	0.902483
PTPRU	Healthy_ADM	0.0454356	0.810235	0.900137
PPIE	Healthy_ADM	-0.194789	0.127691	0.385448
TMEM184B	Healthy_ADM	0.0426667	0.629304	0.790022
C19orf81	Healthy_ADM	-0.463323	0.00635771	0.117702
ANKRD28	Healthy_ADM	-0.096574	0.0886946	0.343641
EFCAB13	Healthy_ADM	-0.139211	0.21201	0.466504
YIPF6	Healthy_ADM	0.254124	0.236941	0.48831
DENND1B	Healthy_ADM	-0.205373	0.0461585	0.268747
ZNF783	Healthy_ADM	-0.224209	0.111627	0.36557
TRPM4	Healthy_ADM	-0.296877	0.0132336	0.161452
TGFBR3L	Healthy_ADM	-0.659864	0.0188902	0.185923
CGGBP1	Healthy_ADM	0.0601399	0.502858	0.701528
RAB9A	Healthy_ADM	0.309067	0.124201	0.3826
LRCOL1	Healthy_ADM	-0.699803	0.0335066	0.24104
MPC1L	Healthy_ADM	-0.573282	0.0126999	0.158915
MLLT10	Healthy_ADM	0.288988	0.153864	0.412578
THAP3	Healthy_ADM	-0.0746303	0.575012	0.754022
CLRN1	Healthy_ADM	-0.562582	0.132276	0.391928
BIK	Healthy_ADM	-0.235804	0.228898	0.481947
ZFP91	Healthy_ADM	0.234226	0.0640087	0.303755
BTN2A1	Healthy_ADM	-0.266254	0.145054	0.403913
BCL7B	Healthy_ADM	0.264398	0.231717	0.48471
BTN3A2	Healthy_ADM	-0.475013	0.058175	0.294052
OXR1	Healthy_ADM	-0.320297	0.00376242	0.0889435
SIGLEC9	Healthy_ADM	-0.351707	0.0763692	0.326824
ATP6V0C	Healthy_ADM	0.339014	0.0491555	0.27507
ARHGEF12	Healthy_ADM	0.118295	0.139655	0.397733
EIF4G3	Healthy_ADM	0.0337143	0.733643	0.854027
RBM4	Healthy_ADM	0.192801	0.009978	0.144371
CPNE1	Healthy_ADM	-0.102193	0.372515	0.604714
CAPN1	Healthy_ADM	0.292268	0.104649	0.359418
ATP6V1F	Healthy_ADM	0.0782978	0.399352	0.626423
DCAF6	Healthy_ADM	0.0535214	0.705906	0.836137
KIAA1522	Healthy_ADM	0.49017	0.0024256	0.0670355
NADK	Healthy_ADM	-0.164129	0.129767	0.38824
DCTN5	Healthy_ADM	-0.272789	0.101711	0.356393
EIF3C	Healthy_ADM	-0.0370228	0.719959	0.844132
ATP2C1	Healthy_ADM	-0.113394	0.474475	0.678936
UCHL5	Healthy_ADM	-0.219296	0.0199715	0.190357
UIMC1	Healthy_ADM	0.0683946	0.293363	0.537413
PEX26	Healthy_ADM	-0.289166	0.166197	0.424697
SUN2	Healthy_ADM	0.112141	0.50835	0.704864
MYL6B	Healthy_ADM	0.11151	0.358815	0.594902
PMF1	Healthy_ADM	0.109242	0.0810966	0.332796
CALU	Healthy_ADM	0.0171259	0.84764	0.921004
CRABP2	Healthy_ADM	-0.731023	0.0973973	0.34978
PPP2R5A	Healthy_ADM	-0.436464	0.000526544	0.0227923
POC1B	Healthy_ADM	-0.0087377	0.947116	0.971762
PGM3	Healthy_ADM	-0.178599	0.22529	0.478578
SH3GL1	Healthy_ADM	-0.0090498	0.919646	0.959354
BMP2	Healthy_ADM	-0.0574446	0.724533	0.847317
SAFB	Healthy_ADM	-0.0329633	0.688614	0.826362
PIGO	Healthy_ADM	0.116808	0.252142	0.502388
SEC22C	Healthy_ADM	0.0441174	0.588323	0.7637
NUBPL	Healthy_ADM	-0.272973	0.0363693	0.24882
BMP4	Healthy_ADM	-0.107373	0.313335	0.555457
ZMYND11	Healthy_ADM	0.193845	0.0396697	0.257584
NIPSNAP2	Healthy_ADM	0.0224072	0.818162	0.905752
UBE2E1	Healthy_ADM	0.0932549	0.219704	0.472918
UBE2G2	Healthy_ADM	0.0389978	0.556172	0.740182
BUD23	Healthy_ADM	-0.064692	0.432979	0.649204
SEMA4G	Healthy_ADM	-0.127823	0.180811	0.437456
BMPR2	Healthy_ADM	-0.0558793	0.672706	0.818562
COX16	Healthy_ADM	-0.382087	1.26469e-08	3.47021e-06
PPT2	Healthy_ADM	-0.36812	0.0368107	0.250341
MDM4	Healthy_ADM	0.119406	0.20729	0.462622
PPP5C	Healthy_ADM	0.0460649	0.657665	0.808325
ZNF664	Healthy_ADM	0.254321	0.134048	0.392546
TINAGL1	Healthy_ADM	0.30892	0.236468	0.487858
ANO6	Healthy_ADM	0.382532	0.000349824	0.0176822
ZNF587	Healthy_ADM	-0.569461	0.550455	0.736528
ZNF568	Healthy_ADM	-0.333462	0.00684155	0.122585
ELOC	Healthy_ADM	0.101088	0.0838953	0.336661
CAPZB	Healthy_ADM	0.0849945	0.358954	0.595004
IFI16	Healthy_ADM	-0.0126584	0.895537	0.945891
TP53I3	Healthy_ADM	-0.164509	0.337516	0.577408
KAT5	Healthy_ADM	0.0224842	0.765813	0.875002
TGOLN2	Healthy_ADM	0.205273	0.019174	0.186463
TCAF1	Healthy_ADM	0.076038	0.264647	0.512753
NR1H4	Healthy_ADM	0.239525	0.138451	0.395729
M6PR	Healthy_ADM	0.0186394	0.832531	0.914053
RNF40	Healthy_ADM	0.16651	0.196883	0.454113
ATRN	Healthy_ADM	0.223077	0.230647	0.484303
CLASP1	Healthy_ADM	0.41214	3.6734e-07	7.23659e-05
CXADR	Healthy_ADM	-0.0274098	0.777516	0.881209
BZW1	Healthy_ADM	0.129961	0.106477	0.361353
C1QBP	Healthy_ADM	-0.0386085	0.754582	0.866857
CAMK2G	Healthy_ADM	-0.287322	0.098716	0.351568
CASP1	Healthy_ADM	-0.160389	0.242004	0.49271
CASP4	Healthy_ADM	0.0693915	0.573961	0.752902
CASP10	Healthy_ADM	-0.220474	0.301102	0.544449
SERPINH1	Healthy_ADM	0.0703176	0.751254	0.864831
CCNT1	Healthy_ADM	-0.0199414	0.848337	0.921631
ANAPC13	Healthy_ADM	-0.00507072	0.957463	0.977307
GDA	Healthy_ADM	0.0490896	0.870205	0.933248
TMEM147	Healthy_ADM	-0.0704037	0.411396	0.634671
ARHGEF38	Healthy_ADM	-0.424354	0.0167268	0.177545
TRIM26	Healthy_ADM	0.0836089	0.316957	0.558448
ELOVL5	Healthy_ADM	-0.143711	0.42238	0.642476
NAXD	Healthy_ADM	-0.104761	0.165169	0.423845
CSDE1	Healthy_ADM	0.227544	0.0759729	0.326824
ZKSCAN3	Healthy_ADM	-0.175714	0.091507	0.346141
ZFAND6	Healthy_ADM	0.0308223	0.713331	0.840571
ANKS3	Healthy_ADM	-0.0584577	0.839113	0.917318
EPDR1	Healthy_ADM	-0.00861541	0.886583	0.941994
ABCB9	Healthy_ADM	-0.489132	0.0190162	0.186117
PDE8A	Healthy_ADM	0.315458	0.101226	0.355723
RAD9A	Healthy_ADM	-0.0613425	0.384243	0.614905
PES1	Healthy_ADM	0.0352744	0.686885	0.825718
HINFP	Healthy_ADM	-0.0931726	0.256268	0.504681
APLP2	Healthy_ADM	0.42992	0.0241701	0.209585
NUB1	Healthy_ADM	-0.125404	0.298273	0.542117
CLCN3	Healthy_ADM	0.100618	0.238818	0.489812
NUDT7	Healthy_ADM	0.134701	0.139515	0.397733
TEX264	Healthy_ADM	0.0691959	0.455401	0.664044
RGL2	Healthy_ADM	0.0591947	0.484709	0.686871
FANCC	Healthy_ADM	-0.106977	0.528211	0.719786
RABGAP1L	Healthy_ADM	-0.115058	0.179932	0.436378
HDLBP	Healthy_ADM	-0.210202	0.27078	0.517641
STX5	Healthy_ADM	-0.0664312	0.535219	0.724401
GFPT1	Healthy_ADM	-0.313543	0.0252289	0.213473
AGAP1	Healthy_ADM	0.0583114	0.600319	0.769772
NFIC	Healthy_ADM	0.195852	0.106203	0.361353
SYT13	Healthy_ADM	0.0709432	0.558198	0.741209
ENTPD5	Healthy_ADM	-0.619533	0.00130522	0.0451713
CD68	Healthy_ADM	-0.556422	0.01511	0.171683
USP15	Healthy_ADM	0.000669788	0.992471	0.996883
NT5C	Healthy_ADM	-0.212192	0.128298	0.386251
TNIP1	Healthy_ADM	0.096298	0.456729	0.665131
CLPS	Healthy_ADM	-0.356061	0.688796	0.826362
THBS3	Healthy_ADM	0.235403	0.0510912	0.278184
ACSS1	Healthy_ADM	0.209384	0.0386138	0.25575
RPL15	Healthy_ADM	0.166538	0.354319	0.591661
SMIM22	Healthy_ADM	-0.225778	0.0095277	0.141043
ZNF444	Healthy_ADM	-0.0422267	0.632956	0.791505
SLC52A2	Healthy_ADM	0.0166573	0.900845	0.947334
UXS1	Healthy_ADM	0.084169	0.406043	0.630966
TBC1D1	Healthy_ADM	0.141251	0.213432	0.467712
CSE1L	Healthy_ADM	-0.0396118	0.725619	0.847641
ANKRD11	Healthy_ADM	-0.340484	0.314426	0.556493
RAB34	Healthy_ADM	-0.406714	0.364584	0.598909
ETF1	Healthy_ADM	0.0930269	0.228808	0.481889
CHD1L	Healthy_ADM	0.026928	0.748197	0.863015
NOL8	Healthy_ADM	0.442316	0.137264	0.395501
PRELID3B	Healthy_ADM	0.0928163	0.478888	0.682609
GOLGB1	Healthy_ADM	-0.0312569	0.718304	0.843584
TMEM250	Healthy_ADM	-0.0242185	0.802852	0.896426
PCGF5	Healthy_ADM	-0.0428184	0.537375	0.726109
GLMP	Healthy_ADM	-0.159168	0.194497	0.450921
R3HCC1L	Healthy_ADM	-0.269286	0.491808	0.692868
TEAD2	Healthy_ADM	0.327155	0.144967	0.403837
COX14	Healthy_ADM	0.0444557	0.528701	0.7199
ITCH	Healthy_ADM	0.53672	0.238427	0.489403
SLC20A2	Healthy_ADM	0.10416	0.553854	0.738504
DDX6	Healthy_ADM	0.146695	0.0190961	0.186463
UBE2V1	Healthy_ADM	-0.0277931	0.750796	0.864564
HARS1	Healthy_ADM	0.161704	0.0429264	0.261935
PGBD5	Healthy_ADM	0.0980886	0.35912	0.595059
TP53I11	Healthy_ADM	-0.294953	0.0696654	0.314108
EPB41L1	Healthy_ADM	0.207297	0.108307	0.362269
EPS15L1	Healthy_ADM	-0.039721	0.63998	0.795554
IDH3B	Healthy_ADM	0.0222354	0.774141	0.879217
RDX	Healthy_ADM	0.170184	0.210375	0.465052
CDK9	Healthy_ADM	0.454934	0.058911	0.295632
CDX2	Healthy_ADM	0.0277479	0.835148	0.915457
CES1	Healthy_ADM	0.112587	0.857184	0.926994
ITPA	Healthy_ADM	-0.180547	0.168576	0.425981
IFT20	Healthy_ADM	-0.360836	0.000689105	0.0280127
SLC12A9	Healthy_ADM	-0.0629534	0.455021	0.663868
PSMD5	Healthy_ADM	-0.0345577	0.648855	0.80173
ACADVL	Healthy_ADM	0.155061	0.366517	0.600113
WWP2	Healthy_ADM	0.0248676	0.703145	0.834456
TST	Healthy_ADM	-0.349257	0.102475	0.357384
RPL18	Healthy_ADM	-0.281436	0.172546	0.430133
SREK1	Healthy_ADM	0.0905176	0.436983	0.651658
WTAP	Healthy_ADM	0.0801379	0.203649	0.460188
SLC16A7	Healthy_ADM	0.614713	0.000185324	0.010547
MED4	Healthy_ADM	0.0623216	0.448901	0.660457
MCU	Healthy_ADM	-0.439186	0.127218	0.384783
BCL2L13	Healthy_ADM	-0.256073	0.113269	0.368126
ZFAND2B	Healthy_ADM	-0.0411315	0.600174	0.769772
STX10	Healthy_ADM	-0.0943216	0.255862	0.50454
PPP1R12C	Healthy_ADM	0.101902	0.151636	0.410315
MEF2D	Healthy_ADM	0.030377	0.800711	0.895337
ZNF138	Healthy_ADM	-0.148555	0.169484	0.427075
NSA2	Healthy_ADM	-0.0716712	0.547479	0.734465
AP3B1	Healthy_ADM	-0.0384245	0.689001	0.826442
PSMD6	Healthy_ADM	-0.113708	0.463628	0.670821
DYNC1I2	Healthy_ADM	-0.0690983	0.452208	0.662279
TBC1D16	Healthy_ADM	0.151899	0.320561	0.562289
CUEDC1	Healthy_ADM	0.0765535	0.407129	0.631403
MEGF8	Healthy_ADM	0.0484091	0.469331	0.676026
SLC39A1	Healthy_ADM	0.168791	0.235888	0.487541
LRRC14	Healthy_ADM	0.0454182	0.578877	0.757152
VWA2	Healthy_ADM	-0.0666236	0.543301	0.73103
STX4	Healthy_ADM	0.0118893	0.875035	0.936168
CHD4	Healthy_ADM	0.0858188	0.291739	0.536742
CHGA	Healthy_ADM	0.878809	0.167796	0.42508
IFNL4	Healthy_ADM	-0.423208	0.0464859	0.269548
C9orf153	Healthy_ADM	-0.534252	0.0101169	0.145831
SEC16A	Healthy_ADM	-0.0353167	0.551066	0.736961
DRGX	Healthy_ADM	-0.648452	0.0242881	0.209694
MT1HL1	Healthy_ADM	-0.612658	0.0670637	0.308067
ANKDD1B	Healthy_ADM	-1.08162	0.0588017	0.295632
MFF	Healthy_ADM	0.0134684	0.868405	0.932488
B3GALNT2	Healthy_ADM	-0.0404265	0.687015	0.825718
MAGEB17	Healthy_ADM	-0.686611	0.0795927	0.330862
AOC3	Healthy_ADM	-0.264925	0.410906	0.634505
CIB1	Healthy_ADM	-0.113515	0.184518	0.441781
CHUK	Healthy_ADM	0.0863599	0.355307	0.592666
ZKSCAN8	Healthy_ADM	-0.45183	0.206215	0.461641
HERC4	Healthy_ADM	-0.0120552	0.846141	0.921004
GANAB	Healthy_ADM	0.202291	0.0386539	0.255795
NUP153	Healthy_ADM	-0.32734	0.0959695	0.349156
RUSC1	Healthy_ADM	-0.134388	0.439829	0.653686
RXYLT1	Healthy_ADM	-0.323719	0.118497	0.375584
TADA3	Healthy_ADM	0.030956	0.651852	0.80414
ANXA11	Healthy_ADM	0.24156	0.0563493	0.290169
DNM1L	Healthy_ADM	0.0408109	0.609988	0.777075
GPATCH11	Healthy_ADM	-0.114879	0.547226	0.734413
ZNF518A	Healthy_ADM	-0.0167383	0.8343	0.914919
WSB2	Healthy_ADM	0.0921138	0.242722	0.493683
ZNF316	Healthy_ADM	0.00770405	0.917297	0.957944
LIAS	Healthy_ADM	-0.0977645	0.274161	0.521124
NUP54	Healthy_ADM	-0.245032	0.0400307	0.257584
NFXL1	Healthy_ADM	-0.0533537	0.464712	0.672135
SNRPD3	Healthy_ADM	0.00954119	0.915209	0.956707
RAB23	Healthy_ADM	-0.072509	0.343729	0.582741
POLR2H	Healthy_ADM	-0.295689	0.0905043	0.345769
TBCB	Healthy_ADM	-0.0797178	0.45943	0.667763
RBPJL	Healthy_ADM	-0.0913499	0.696536	0.831068
MBD3	Healthy_ADM	0.12118	0.204343	0.460941
ATG4D	Healthy_ADM	-0.107605	0.232463	0.485426
ADA2	Healthy_ADM	-0.167641	0.477889	0.681697
PRAC2	Healthy_ADM	-0.323323	0.0159331	0.17504
PRIM2	Healthy_ADM	-0.636412	0.19492	0.451338
GOLGA8N	Healthy_ADM	-0.0957167	0.41659	0.637744
MUC20	Healthy_ADM	0.0708766	0.80216	0.896044
UBAP2	Healthy_ADM	-0.272697	0.000140455	0.00877331
PTGES3	Healthy_ADM	0.0528014	0.384693	0.615365
MICAL2	Healthy_ADM	-0.201831	0.111093	0.364821
GAPVD1	Healthy_ADM	0.0375117	0.583565	0.760239
SENP7	Healthy_ADM	-0.0618836	0.279371	0.52631
CCNY	Healthy_ADM	0.0942515	0.328002	0.568719
TLE3	Healthy_ADM	0.0154399	0.868864	0.932721
RTF2	Healthy_ADM	-0.167563	0.240094	0.490988
USP25	Healthy_ADM	0.0391401	0.684572	0.824553
AP3S1	Healthy_ADM	-0.255479	0.034107	0.242891
CCSER2	Healthy_ADM	-0.437072	0.15468	0.413072
PNOC	Healthy_ADM	-0.257456	0.517	0.709949
PPP4R3A	Healthy_ADM	-0.162651	0.290429	0.535738
TBC1D22A	Healthy_ADM	-0.233852	0.0102369	0.146815
CLCA1	Healthy_ADM	-0.2399	0.269904	0.516482
MRAP	Healthy_ADM	-0.574113	0.224249	0.477922
NEURL3	Healthy_ADM	0.640151	0.00728214	0.126091
RBM7	Healthy_ADM	0.0922581	0.160551	0.418422
SMPDL3A	Healthy_ADM	-0.355882	0.0107696	0.149809
MPZL3	Healthy_ADM	-0.620831	0.193669	0.45053
TMEM117	Healthy_ADM	-0.46006	0.14403	0.403273
SPATA6	Healthy_ADM	0.0362218	0.79853	0.894722
KLHL32	Healthy_ADM	-0.868033	0.0438541	0.263662
SCML4	Healthy_ADM	-0.164446	0.392043	0.621183
EMC4	Healthy_ADM	0.151827	0.0643675	0.304667
DUSP22	Healthy_ADM	-0.205261	0.10116	0.355723
RNPS1	Healthy_ADM	-0.142566	0.0388772	0.256382
MTERF3	Healthy_ADM	-0.758544	0.0895	0.344159
FAM120A	Healthy_ADM	-0.149185	0.0229672	0.204396
SLC44A1	Healthy_ADM	-0.216722	0.0297134	0.229688
OTUD6B	Healthy_ADM	-0.0711397	0.444898	0.657463
MRPS27	Healthy_ADM	-0.17848	0.225068	0.478578
GAK	Healthy_ADM	-0.172804	0.0382557	0.254696
RABGEF1	Healthy_ADM	0.113822	0.510651	0.706717
D2HGDH	Healthy_ADM	-0.121052	0.475997	0.68029
ITPRID2	Healthy_ADM	-0.449715	0.0824133	0.334943
FDFT1	Healthy_ADM	0.301082	0.337365	0.577406
CLIC1	Healthy_ADM	-0.266962	0.12405	0.3826
EPHA7	Healthy_ADM	-0.500367	0.142243	0.401108
DAPK1	Healthy_ADM	0.219493	0.131479	0.390624
CLIC2	Healthy_ADM	-0.362134	0.126306	0.38395
SLC22A17	Healthy_ADM	-0.0549191	0.695857	0.830682
ST6GALNAC1	Healthy_ADM	-0.596896	0.0643992	0.304667
SMARCA2	Healthy_ADM	-0.11773	0.682742	0.8236
MMS19	Healthy_ADM	-0.136045	0.172395	0.430094
SEMA3B	Healthy_ADM	-0.0144216	0.85898	0.928143
VPS11	Healthy_ADM	0.0333822	0.674951	0.819866
DOCK1	Healthy_ADM	0.245944	0.0341359	0.242891
CYB561D2	Healthy_ADM	-0.0959789	0.165605	0.424256
PPP2R2D	Healthy_ADM	-0.300771	0.0561374	0.289781
GGA3	Healthy_ADM	-0.0164257	0.874547	0.936168
GRAP2	Healthy_ADM	-0.279465	0.0965843	0.349408
CLNS1A	Healthy_ADM	-0.134621	0.0317425	0.235787
CLPTM1	Healthy_ADM	0.0696526	0.49121	0.692594
TMEM128	Healthy_ADM	-0.241263	0.280172	0.52631
SIN3B	Healthy_ADM	0.143191	0.0325146	0.238748
ZNF461	Healthy_ADM	-0.295938	0.149474	0.407961
RGL1	Healthy_ADM	0.0326169	0.869194	0.932755
ZNF417	Healthy_ADM	0.322166	0.627146	0.789102
SYNE4	Healthy_ADM	-2.04381	0.176176	0.433247
HELQ	Healthy_ADM	-0.147236	0.0662872	0.307168
CNN1	Healthy_ADM	-0.742231	0.202333	0.458725
LYPLAL1	Healthy_ADM	-0.0401714	0.71595	0.841994
RHOD	Healthy_ADM	-0.145916	0.427967	0.646876
WNT8A	Healthy_ADM	-0.0730437	0.44736	0.659327
EIF3K	Healthy_ADM	-0.192956	0.0542779	0.285061
AMOTL1	Healthy_ADM	0.288974	0.0593612	0.296457
GANC	Healthy_ADM	0.0384951	0.703632	0.834646
NEMF	Healthy_ADM	0.278752	0.51624	0.70953
SS18L1	Healthy_ADM	-0.885224	0.0705594	0.316098
UMAD1	Healthy_ADM	-0.0363397	0.637774	0.79422
KLF13	Healthy_ADM	-0.163546	0.0211747	0.195861
TRIM2	Healthy_ADM	-0.616963	0.0527446	0.280829
DEFB134	Healthy_ADM	-0.263868	0.0858096	0.340008
C3orf35	Healthy_ADM	-0.731985	0.233316	0.485436
TMED4	Healthy_ADM	0.0484893	0.374886	0.607323
HEXIM2	Healthy_ADM	-0.196845	0.659955	0.809456
POLR3C	Healthy_ADM	0.0108898	0.921874	0.960765
SHLD1	Healthy_ADM	-0.35212	0.476839	0.681211
ELK3	Healthy_ADM	-0.397332	0.104793	0.359593
MEIKIN	Healthy_ADM	-0.567044	0.53761	0.726298
MLEC	Healthy_ADM	-0.0922829	0.401399	0.627957
CPD	Healthy_ADM	-0.250402	0.350008	0.588264
ARMC7	Healthy_ADM	-0.0819372	0.567722	0.748552
SLMAP	Healthy_ADM	-0.181727	0.136377	0.394794
TGDS	Healthy_ADM	-0.795256	0.4471	0.659167
GALNT11	Healthy_ADM	-0.229124	0.0511615	0.278184
CIAO3	Healthy_ADM	-0.16569	0.598561	0.768763
CLDN4	Healthy_ADM	0.920649	0.0408464	0.258326
DYNLRB2	Healthy_ADM	-0.679003	0.0946252	0.34835
STK38	Healthy_ADM	-0.107399	0.4105	0.634397
PTOV1	Healthy_ADM	0.169181	0.0102707	0.146815
CLDN3	Healthy_ADM	0.912764	1.59916e-06	0.000255965
DLEU7	Healthy_ADM	-0.543029	0.222615	0.475494
TDRD15	Healthy_ADM	-0.967951	0.162024	0.420137
SPDYE5	Healthy_ADM	0.0882738	0.276117	0.522771
SETD7	Healthy_ADM	0.0930099	0.16915	0.426511
CLDN7	Healthy_ADM	0.424257	0.00572132	0.110445
TM2D3	Healthy_ADM	-0.0908558	0.245897	0.497165
PTPRN2	Healthy_ADM	-0.226072	0.305308	0.548697
SHFL	Healthy_ADM	-0.145722	0.264689	0.512753
TSPAN2	Healthy_ADM	0.0398054	0.796177	0.892867
MYO15B	Healthy_ADM	0.0338693	0.889024	0.943291
CREBL2	Healthy_ADM	0.449204	0.225925	0.478578
CRIP1	Healthy_ADM	-0.700859	0.0160282	0.17504
BLOC1S6	Healthy_ADM	-0.0666175	0.537873	0.726526
CRMP1	Healthy_ADM	-0.0565875	0.638081	0.79422
MAPK14	Healthy_ADM	-0.400203	0.0509514	0.278184
PRRG2	Healthy_ADM	-0.103239	0.131056	0.389914
C2orf81	Healthy_ADM	-0.991419	0.0658987	0.306662
GPALPP1	Healthy_ADM	-0.190448	0.155217	0.413912
SNRPG	Healthy_ADM	0.189773	0.033427	0.240693
SNF8	Healthy_ADM	0.142216	0.311982	0.554058
SPACA3	Healthy_ADM	-1.37742	0.1423	0.401108
MED29	Healthy_ADM	-0.242064	0.236158	0.487592
AK8	Healthy_ADM	-0.545043	0.425063	0.644694
ZDHHC12	Healthy_ADM	-0.384349	0.269677	0.516475
SNCB	Healthy_ADM	-1.10073	0.137633	0.395652
DMAC1	Healthy_ADM	-0.0122002	0.857554	0.926994
SLC6A5	Healthy_ADM	-0.809744	0.0422001	0.26105
SLC35E4	Healthy_ADM	-0.338563	0.342477	0.581308
COX4I1	Healthy_ADM	-0.00777248	0.936813	0.967671
TAF1B	Healthy_ADM	-0.239269	0.446406	0.659136
CSNK1G2	Healthy_ADM	0.0413513	0.541902	0.729659
CSNK2B	Healthy_ADM	0.14189	0.206712	0.462164
RANBP10	Healthy_ADM	-0.231726	0.0110952	0.151951
HSPBAP1	Healthy_ADM	0.0892178	0.585518	0.761559
IL1R1	Healthy_ADM	0.748022	0.000112459	0.00768629
CSRP2	Healthy_ADM	-0.111389	0.538845	0.727327
SLC30A4	Healthy_ADM	-0.625926	0.165704	0.424369
PSTPIP1	Healthy_ADM	0.139768	0.680375	0.822485
SULT1C4	Healthy_ADM	-0.295832	0.575426	0.754436
SFXN1	Healthy_ADM	-0.515074	0.103227	0.357969
CST6	Healthy_ADM	-0.493358	0.58952	0.763856
TMC7	Healthy_ADM	-0.236886	0.107341	0.361797
ACSM5	Healthy_ADM	-0.347779	0.0136581	0.163808
CSTF2	Healthy_ADM	-0.289842	0.0167709	0.177545
CTBP1	Healthy_ADM	0.0839429	0.272659	0.520069
CTBP2	Healthy_ADM	-0.100574	0.039772	0.257584
DNAJC13	Healthy_ADM	-0.090796	0.136184	0.394617
LRP10	Healthy_ADM	-0.0714014	0.720114	0.844132
ZNF208	Healthy_ADM	0.0383837	0.764285	0.874353
MTA3	Healthy_ADM	-0.167711	0.00201471	0.0600591
PLCZ1	Healthy_ADM	-0.435212	0.0841	0.336661
CTNND1	Healthy_ADM	0.223692	0.162277	0.420497
CTNND2	Healthy_ADM	-0.312852	0.313795	0.556145
CTSO	Healthy_ADM	0.259074	0.0237244	0.20713
CTSW	Healthy_ADM	-1.3067	0.590107	0.763856
CTSZ	Healthy_ADM	0.332746	0.449701	0.661213
CX3CR1	Healthy_ADM	0.248867	0.275871	0.522492
DAB2	Healthy_ADM	0.165795	0.684747	0.824553
DAD1	Healthy_ADM	0.0220282	0.790974	0.889325
BRME1	Healthy_ADM	-0.340979	0.316498	0.55836
DGKQ	Healthy_ADM	-0.633301	0.0450585	0.265685
SLC46A3	Healthy_ADM	-1.91704	0.100695	0.355497
DAPK3	Healthy_ADM	-0.303425	0.440425	0.654169
CYP2D7	Healthy_ADM	0.210531	0.0597517	0.296851
REC114	Healthy_ADM	-0.778347	0.0418955	0.260405
DARS1	Healthy_ADM	-0.0395456	0.51378	0.707322
DAXX	Healthy_ADM	-0.415633	0.79611	0.892867
DAZL	Healthy_ADM	-0.819394	0.327994	0.568719
AKR1C1	Healthy_ADM	-0.166649	0.666996	0.814064
FAAH2	Healthy_ADM	-0.299095	0.157875	0.41615
DDT	Healthy_ADM	-0.135527	0.145779	0.404778
NANOGP8	Healthy_ADM	-0.678124	0.0118766	0.155713
DDX3X	Healthy_ADM	0.0651263	0.328654	0.569196
DHX9	Healthy_ADM	-0.0957887	0.664383	0.812345
DHX15	Healthy_ADM	0.0547177	0.6404	0.795812
DECR1	Healthy_ADM	0.139586	0.204617	0.461154
DHCR7	Healthy_ADM	-0.209116	0.439614	0.653686
DHODH	Healthy_ADM	-1.19815	0.067703	0.309805
DIO3	Healthy_ADM	0.285941	0.000166829	0.00970836
DKC1	Healthy_ADM	-0.194131	0.0950598	0.348616
DLG4	Healthy_ADM	0.0590163	0.790421	0.889117
DNAH5	Healthy_ADM	0.258226	0.547407	0.734465
DNAH6	Healthy_ADM	-0.31939	0.225056	0.478578
DNAH9	Healthy_ADM	-0.811167	0.384246	0.614905
DNAH14	Healthy_ADM	-0.32101	0.231648	0.48471
DYNC1H1	Healthy_ADM	0.0665306	0.466187	0.673128
DOK1	Healthy_ADM	-0.157219	0.375047	0.607323
DPH1	Healthy_ADM	-0.0792744	0.532557	0.72202
DUSP9	Healthy_ADM	-1.03891	0.0346086	0.243113
DYRK1A	Healthy_ADM	-0.208046	0.129943	0.388616
ECE1	Healthy_ADM	-0.158082	0.301929	0.545432
LPAR1	Healthy_ADM	0.0863665	0.517383	0.710202
EEF1G	Healthy_ADM	0.0563849	0.747724	0.862836
EFNA2	Healthy_ADM	-0.623629	0.0122237	0.158229
EFNB3	Healthy_ADM	-0.532374	0.203904	0.460577
CELSR3	Healthy_ADM	-0.626047	0.684099	0.82446
CELSR2	Healthy_ADM	-0.170369	0.350363	0.58838
EIF2B1	Healthy_ADM	-0.0185575	0.778559	0.881308
EIF4B	Healthy_ADM	-0.040765	0.724751	0.847317
EMP1	Healthy_ADM	0.492592	0.0926846	0.346141
EMP2	Healthy_ADM	-0.531129	4.37704e-07	8.40721e-05
EMP3	Healthy_ADM	-0.0951954	0.641445	0.796228
EN1	Healthy_ADM	-0.527332	0.0885229	0.343322
ENO1	Healthy_ADM	0.677548	0.0245507	0.210788
EP300	Healthy_ADM	0.0863655	0.215512	0.469591
EPAS1	Healthy_ADM	0.132424	0.0811237	0.332796
EREG	Healthy_ADM	-0.458648	0.0660681	0.306893
ERN1	Healthy_ADM	-0.38261	0.000151855	0.00915627
FBL	Healthy_ADM	-0.0705222	0.512786	0.707004
EXTL3	Healthy_ADM	0.124587	0.0968378	0.349622
FABP1	Healthy_ADM	-0.140233	0.118767	0.37613
FABP5	Healthy_ADM	-0.306491	0.0159416	0.17504
GPC4	Healthy_ADM	-0.170724	0.28316	0.528681
FOXF1	Healthy_ADM	-0.632427	0.225808	0.478578
FOXO3	Healthy_ADM	0.292342	0.00151731	0.0506848
FLNA	Healthy_ADM	1.29534	0.152988	0.410838
XRCC6	Healthy_ADM	0.055409	0.510195	0.706402
GABBR1	Healthy_ADM	0.251391	0.307629	0.550294
GAS8	Healthy_ADM	0.107506	0.115835	0.37171
GATM	Healthy_ADM	0.437875	0.459369	0.667763
TADA2A	Healthy_ADM	0.013878	0.894803	0.945483
GDI1	Healthy_ADM	0.334747	3.83691e-06	0.000483261
GDI2	Healthy_ADM	-0.0815077	0.399144	0.626423
B4GALT1	Healthy_ADM	0.227781	0.26122	0.509766
GCLC	Healthy_ADM	-0.0432341	0.681926	0.823133
GMDS	Healthy_ADM	-0.311613	0.372659	0.604714
GP2	Healthy_ADM	-0.375141	0.672563	0.818518
GPR39	Healthy_ADM	-0.153229	0.200863	0.45766
GSTA4	Healthy_ADM	-0.0317227	0.708872	0.837748
GTF3C1	Healthy_ADM	0.0146259	0.88519	0.941433
GTF3C2	Healthy_ADM	-0.073697	0.252567	0.502844
HDAC2	Healthy_ADM	0.108119	0.118821	0.376145
HIF1A	Healthy_ADM	0.414428	0.0139725	0.164414
PRMT2	Healthy_ADM	0.227466	0.000276895	0.014472
PRMT1	Healthy_ADM	0.060985	0.370001	0.602144
HSBP1	Healthy_ADM	0.11032	0.177282	0.434046
HSPB1	Healthy_ADM	-1.16925	0.175004	0.432416
IGSF3	Healthy_ADM	0.0554975	0.553034	0.738436
NDST1	Healthy_ADM	0.184073	0.00893474	0.136087
IGBP1	Healthy_ADM	-0.0635193	0.55366	0.738504
IGFBP7	Healthy_ADM	1.70456	0.00956835	0.141313
CCN1	Healthy_ADM	0.50881	0.140135	0.398468
IKBKB	Healthy_ADM	-0.132456	0.0744208	0.325057
IL13RA1	Healthy_ADM	-0.0323098	0.77799	0.881308
IL18	Healthy_ADM	-0.0594134	0.636621	0.793611
ING2	Healthy_ADM	-0.168227	0.169834	0.427255
INPPL1	Healthy_ADM	0.0566015	0.369854	0.602036
EIF3E	Healthy_ADM	-0.0354086	0.781632	0.883725
IRAK1	Healthy_ADM	-0.127181	0.300512	0.544023
AARS1	Healthy_ADM	0.0265849	0.789589	0.888661
ACTA2	Healthy_ADM	1.08049	0.0233467	0.205472
PARP1	Healthy_ADM	0.00895038	0.897618	0.946166
GRK2	Healthy_ADM	-0.113179	0.0694998	0.313914
AHNAK	Healthy_ADM	0.423958	0.0110142	0.151382
AHSG	Healthy_ADM	0.0286578	0.774303	0.879217
CRYBG1	Healthy_ADM	0.127769	0.415842	0.637388
AKT2	Healthy_ADM	0.0331644	0.577071	0.755677
ALCAM	Healthy_ADM	0.159467	0.0932799	0.346888
AKR1B1	Healthy_ADM	-0.00903858	0.921724	0.960739
AMBP	Healthy_ADM	1.32523	0.00845447	0.133654
AMD1	Healthy_ADM	0.0615474	0.426299	0.645347
SLC25A6	Healthy_ADM	0.394504	0.0833378	0.336461
APCS	Healthy_ADM	0.19444	0.576967	0.755677
APEX1	Healthy_ADM	0.0235324	0.733079	0.853758
APOC1	Healthy_ADM	-0.0847633	0.677326	0.820776
APOD	Healthy_ADM	1.13696	0.000504093	0.0225171
ARAF	Healthy_ADM	-0.0298875	0.647535	0.800355
ARCN1	Healthy_ADM	0.0962178	0.434362	0.649767
AREG	Healthy_ADM	-0.0206898	0.897155	0.946166
ARF4	Healthy_ADM	-0.212753	0.145937	0.404873
ARF5	Healthy_ADM	0.0816414	0.421241	0.641761
ARF6	Healthy_ADM	-0.0173881	0.83095	0.913201
RHOA	Healthy_ADM	-0.0592245	0.42926	0.647261
ARL2	Healthy_ADM	0.0372989	0.553346	0.738504
ARSD	Healthy_ADM	-0.185132	0.0315888	0.235787
ARVCF	Healthy_ADM	0.0377528	0.671161	0.817458
ASGR1	Healthy_ADM	0.0839885	0.508849	0.705317
ASIP	Healthy_ADM	0.0762093	0.596711	0.767991
ATF4	Healthy_ADM	0.0380952	0.708201	0.837223
ATP1B3	Healthy_ADM	-0.093201	0.358352	0.594655
ATP2B1	Healthy_ADM	-0.0984974	0.295063	0.539176
ATP2B4	Healthy_ADM	0.201149	0.00465397	0.0980273
ATP5F1B	Healthy_ADM	0.0934064	0.323657	0.564559
ATP5F1D	Healthy_ADM	-0.0484602	0.721658	0.845327
ATP5PB	Healthy_ADM	0.171247	0.00977645	0.142799
ATP6V1A	Healthy_ADM	0.24256	0.00767382	0.128575
ATP6V1B1	Healthy_ADM	0.047393	0.62243	0.78576
ATP6V1B2	Healthy_ADM	0.219264	0.0229272	0.204396
ATP6V1C1	Healthy_ADM	0.230611	0.134578	0.392546
ATP5PO	Healthy_ADM	0.196583	0.432142	0.648636
AUH	Healthy_ADM	0.00418204	0.957074	0.977115
BCL6	Healthy_ADM	0.0433456	0.688404	0.826362
[truncated: 59,695 more rows]

## Sheet: Supplemental Table 4
Supplemental Table 4) Kras mutational profiling on select donor samples
Sample ID	IGO ID	Total Input (ng)	Droplet Count Mu	Droplet Count WT	Ratio ([Mu]/[WT])	Accepted Droplets	Mean Ratio	Std Ratio	Average Accepted Droplets
AIFR291_C1	Well 1	9	6	2383	0.00251783	20651
	Well 2	9	13	2380	0.00546218	21779
	Well 3	9	4	2208	0.00181159	19504	0.00326387	0.00193627	20644.7
AII1271_C1	Well 1	9	3	4725	0.000634921	21304
	Well 2	9	9	4427	0.00203298	19803
	Well 3	9	8	3873	0.00206558	18917	0.00157783	0.000816744	20008
Negative	Neg/Water	0	0	0	0	19762
Positive	Positive Control	9	2095	1947	1.07601	20354
gDNAControl	H gDNA Control	9	0	1810	0	19821
Sample ID	IGO ID	Total Input (ng)	Droplet Count Mu	Droplet Count WT	Ratio ([Mu]/[WT])	Accepted Droplets	Mean Ratio	Std Ratio	Average Accepted Droplets
AIFR291_C1	Well 1	9	2	2264	0.000883392	20949
	Well 2	9	3	2281	0.00131521	21384
	Well 3	9	1	2285	0.000437637	19901	0.000878747	0.000438806	20744.7
AII1271_C1	Well 1	9	1	4269	0.000234247	20360
	Well 2	9	2	4710	0.000424628	21184
	Well 3	9	1	4208	0.000237643	20603	0.000298839	0.00010895	20715.7
Negative	Neg/Water	0	0	0	0	19356
Positive	Positive Control	9	191	1795	0.106407	19702
gDNAControl	H gDNA Control	9	0	1753	0	20787
Sample ID	IGO ID	Total Input (ng)	Droplet Count Mu	Droplet Count WT	Ratio ([Mu]/[WT])	Accepted Droplets	Mean Ratio	Std Ratio	Average Accepted Droplets
AIFR291_C1	Well 1	9	1	2443	0.000409333	21557
	Well 2	9	1	2293	0.00043611	20449
	Well 3	9	0	2237	0	18880	0.000281814	0.000244425	20295.3
AII1271_C1	Well 1	9	0	4654	0	20515
	Well 2	9	0	4679	0	19898
	Well 3	9	0	4400	0	20140	0	0	20184.3
Negative	Neg/Water	0	0	0	0	21097
Positive	Positive Control	9	647	1731	0.373772	20601
gDNAControl	H gDNA Control	9	0	1794	0	20530
Mutation Tested	Sample ID	Mean Ratio	Std Ratio	Average Accepted Droplets
KRAS G12D	AIFR291_C1	0.00326387	0.00193627	20644.7
KRAS G12D	AII1271_C1	0.00157783	0.000816744	20008
KRAS G12R	AIFR291_C1	0.000878747	0.000438806	20744.7
KRAS G12R	AII1271_C1	0.000298839	0.00010895	20715.7
KRAS G12V	AIFR291_C1	0.000281814	0.000244425	20295.3
KRAS G12V	AII1271_C1	0	0	20184.3

## Sheet: Supplemental Table 5
Supplemental Table 5) multiplex IF antibodies
Antibodies	Source	Catalog Number
Rabbit anti-human CD3, 1:100	Dako	A0452
Rabbit anti-human CD8, 1:400	Bioss	bs-0648R
Mouse anti-human CD163, 1:400	Leica	6080491
Mouse anti-human Arg1, 1:400	Proteintech	66129-1-Ig
Mouse anti-human Pancytokeratin, 1:500	Dako	M3515
Mouse anti-human FoxP3, 1:400	Biolegend	320201
Rabbit anti-human αSMA, 1:100	Abcam	ab5694
Rabbit anti-human PDGFRb, 1:300	Abcam	ab32570
Rabbit anti-human FAP, 1:100	Abcam	ab53066
Rabbit anti-human Vimentin, 1:1000	Sigma Life Science	HPA001762
Rabbit anti-human CD45, 1:100	Abcam	ab10558

## Sheet: Supplemental Table 6
Table 6A) Immunofluorescence Primary Antibodies Used for co-IF
Antibodies	Source	Catalog Number
Rabbit anti-human Claudin 18, 1:100	Invitrogen	700178
Rabbit anti-human Aqp1, 1:500	Abcam	ab219055
Rabbit anti-human Aqp3, 1:200	Abcam	ab125219
Rabbit anti-human Muc5ac, 1:200	Cell Signaling	61193T
Rabbit anti-human Muc5b, 1:200	Cell Signaling	74978S
Table 6B) Secondary Antibodies used for co-IF
Antibodies	Source	Catalog Number
Goat polyclonal anti-rabbit Alexa Fluor 594, 1:400	Thermo Fisher Scientific	A-32740
Goat polyclonal anti-rabbit Alexa Fluor 488, 1:400	Thermo Fisher Scientific	A-11008
Table 6C) RNAScope Probe used for co-IF/ISH
Probe	Source	Catalog Number
Hs-TFF1	Advanced Cell Diagnostics	417281
